# Supplementary material for: Exploring structural and optical properties of a new series of soft salts based on cyclometalated platinum complexes
Source: Royal Society of Chemistry journal article supplement (doi:10.1039/d4dt01188k), 2024-01-01
Supplement: d4dt01188k1.pdf [file d4dt01188k1.pdf]

## SUPPORTING INFORMATION

### **Exploring Structural and Optical Properties of a New Series of Soft Salts Based on Cyclometalated Platinum Complexes**

Alexandre Rico,<sup>[a]</sup> Pascal Le Poul,<sup>[a]</sup> Julián Rodríguez-López,<sup>[b]</sup>

Sylvain Achelle,<sup>[a]</sup> and Sébastien Gauthier<sup>[a]\*</sup>

<sup>[a]</sup> Univ. Rennes, CNRS, ISCR (Institut des Sciences Chimiques de Rennes), UMR 6226, F-35000 Rennes, France.

<sup>[b]</sup> Universidad de Castilla-La Mancha, Área de Química Orgánica, Facultad de Ciencias y Tecnologías Químicas, Avda. Camilo José Cela 10, 13071, Ciudad Real, Spain.

## Table of contents

|                                                                              |           |
|------------------------------------------------------------------------------|-----------|
| <b>1- General procedure</b>                                                  | <b>3</b>  |
| <b>2- Synthesis of ligands L1-L8</b>                                         | <b>6</b>  |
| <b>3- Synthesis of precursors C1-2 and A1-7</b>                              | <b>8</b>  |
| <b>4- Synthesis of soft salts S1-9</b>                                       | <b>15</b> |
| <b>5- <math>^1\text{H}</math> and <math>^{13}\text{C}</math> NMR Spectra</b> | <b>20</b> |
| <b>A- L1-L8 ligands</b>                                                      | <b>20</b> |
| <b>B- C1-C2 cationic precursors</b>                                          | <b>28</b> |
| <b>C- A1-A7 anionic precursors</b>                                           | <b>29</b> |
| <b>D- S0-S9 soft salts</b>                                                   | <b>36</b> |
| <b>6- Photophysical data in solution</b>                                     | <b>46</b> |
| <b>7- Photophysical data in the solid state</b>                              | <b>52</b> |

## EXPERIMENTAL SECTION

### 1- General Procedures

In air- and moisture-sensitive reactions, all glassware was flame-dried. All reactions under a dry nitrogen atmosphere were conducted using Schlenk techniques. The starting materials were purchased from Sigma-Aldrich, TCI, or Alfa-Aesar and were used as received. Thin layer chromatography (TLC) was conducted on pre-coated aluminum sheets with 0.20 mm Merck Alugram SIL G/UV254, with fluorescent indicator UV254 and 0.25 mm Merck silica gel (60-F254). Column chromatography was carried out using Macherey Nagel silica gel 60 (particle size 63-200  $\mu\text{m}$ ) and Macherey Nagel Aluminum neutral oxide 40 (particle size 40-160  $\mu\text{m}$ ). Nuclear magnetic resonance (NMR) spectra were acquired at room temperature on a Bruker AC-300 spectrometer ( $^1\text{H}$  at 300 MHz,  $^{13}\text{C}$  at 75 MHz,) and referenced as follows:  $^1\text{H}$  NMR, residual  $\text{CHCl}_3$  ( $\delta = 7.26$  ppm);  $^{13}\text{C}\{^1\text{H}\}$  NMR, internal  $\text{CDCl}_3$  ( $\delta = 77.2$  ppm). The chemical shifts  $\delta$  are reported in parts per million relatives to TMS ( $^1\text{H}$ , 0.0 ppm) and  $\text{CDCl}_3$  ( $^{13}\text{C}$ , 77.2 ppm). The coupling constant  $J$  is given in Hz. In the  $^1\text{H}$  NMR data, the following abbreviations are used to describe the peak pattern: s (singlet), d (doublet), dd (doublet of doublet), t (triplet), q (quadruplet) and m (multiplet). Acidic impurities in  $\text{CDCl}_3$  were removed by treatment with anhydrous  $\text{K}_2\text{CO}_3$ . UV-Vis and fluorescence spectra were recorded using standard 1 cm quartz cells on a Jasco V-650 spectrophotometer and a Horiba Fluoromax spectrometer, respectively. Complexes were excited at their absorption maxima (band of lowest energy) to record the emission spectra in degassed DMSO. Fluorescence quantum yields in solution were calculated relative to 9,10-bis(phenylethynyl)anthracene in cyclohexane ( $\Phi_{\text{PL}} = 1$ ) as the reference. Fluorescence quantum yields in solution were calculated relative to 9,10-bis(phenylethynyl)anthracene in cyclohexane ( $\Phi_{\text{PL}} = 1$ ) as the reference using solutions with absorbance below 0.1 at excitation wavelength. Five solutions of different concentration were used for each compound and the standard. Solid-state emission spectra were registered at 1 wt% in a KBr matrix. The phosphorescence lifetimes measurements in the solid state were performed on the same spectrometer in the phosphorimeter mode. Fluorescence quantum yields of solid samples (powder) were calculated using a Jasco FP-8300 spectrofluorometer equipped with a Jasco ILF-835/100 mm integrating sphere. High Resolution Mass Spectrometry (HRMS) analyses were performed at the "Centre Régional de Mesures Physiques de l'Ouest" (CRMPO, University of Rennes, France) using a Thermo scientific Orbitrap Exploris 480 apparatus. Vapochromism tests were performed by depositing a small quantity of product (powder) on a glass plate, which was then introduced into a slope closed test tube containing a small volume of the selected solvent for 10 min (heating is possible for less volatile solvents). Reversible solid-state emission quenching was observed using the same procedure as vapochromism tests, by replacing the solvents with HCl or  $\text{NH}_3$  vapors. In solution, reactions were performed by bubbling ( $\text{N}_2$ ) a solution of HCl/ $\text{NH}_3$ , and the acid/basic vapors were introduced directly into the analytical quartz cells via cannulas for 10 min.

### **A. Synthesis of Ligands**

In an oven-dried Schlenk tube under a N<sub>2</sub> atmosphere 2-bromopyridine or 2-chloropyrimidine (1 eq.) and aryl phenyl boronic acid (1.3 eq.) were added. A mixture of 2 M Na<sub>2</sub>CO<sub>3</sub> aqueous solution/toluene/ethanol (8/30/8) was poured into the flask and Pd(PPh<sub>3</sub>)<sub>4</sub> (0.05 eq.) was added. The mixture was heated to reflux for 24 h. After completion of the reaction, the reaction mixture was cooled to room temperature and the crude compound was extracted with EtOAc. The organic phase was washed with a saturated NH<sub>4</sub>Cl solution and dried over MgSO<sub>4</sub>. The crude product was purified by column chromatography over silica gel using petroleum ether/EtOAc as eluent.

### **B. Synthesis of cyclometalated Platinum (II) dimers**

Platinum(II) dimers [Pt(C<sup>^</sup>N)<sub>2</sub>Cl]<sub>2</sub> were prepared using 1.5 eq. of the C<sup>^</sup>N ligand vs K<sub>2</sub>PtCl<sub>4</sub>. The two reactants were placed in the reaction flask in a deoxygenated mixture of 15 mL of 2-ethoxyethanol and 5 mL of water. The mixture was stirred at 80 °C for 16 h under a nitrogen atmosphere. After cooling down, the mixture was poured into 30 mL of cold water. Yellow solids were obtained by filtration and vacuum drying.

### **C. Synthesis of cationic Platinum complexes**

Platinum(II) dimers [Pt(C<sup>^</sup>N)<sub>2</sub>Cl]<sub>2</sub> were added to a solution of 3 eq. of ethylenediamine in 15 mL of dichloromethane. Under a nitrogen atmosphere, the mixture was stirred at room temperature for 3 h until yellow solid suspensions were observed. Yellow solids were obtained by filtration, which were washed with water (3 × 10 mL) and dichloromethane (3 × 10 mL).

### **D. Synthesis of anionic platinum complexes**

Platinum(II) dimers [Pt(C<sup>^</sup>N)<sub>2</sub>Cl<sub>2</sub>] and 4 eq. of tetrabutylammonium cyanide were refluxed at 50 °C in dichloromethane for 5 h. After cooling, the crude compound was extracted three times with dichloromethane and the organic phase was washed with water. Finally, the desired solid product was obtained by column chromatography over alumina, eluting with dichloromethane/methanol (20/1).

### **E. Synthesis of Soft Salts**

All soft salts were prepared by metathesis reaction. 1 eq. of anionic complex and 1.1 eq. of cationic complex were dissolved in 5 mL ethanol. The yellow solution turned red after ultrasonic treatment for 10 min. Deionized water (50 mL) was then added to the mixture and the ultrasonic treatment was extended for 30 min., until the formation of a solid suspension was observed. Finally, the residue was filtered, washed with 10 mL of deionized water and 10 mL of dichloromethane to provide the desired soft salt.

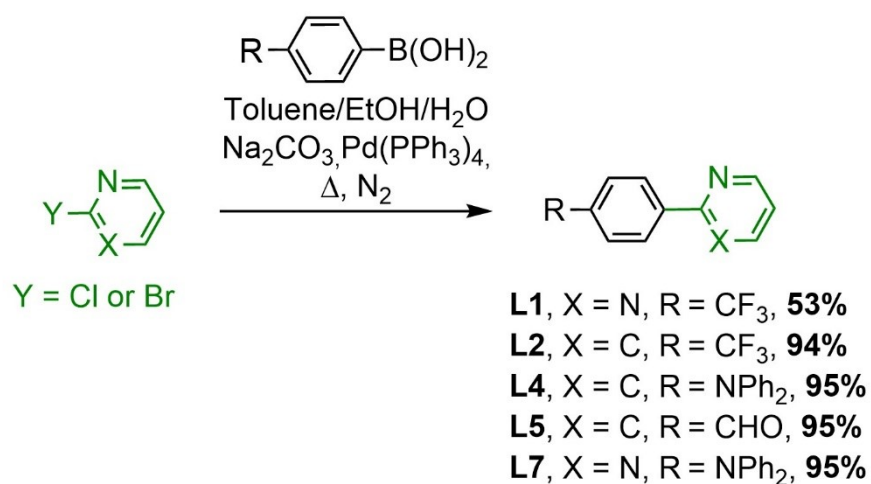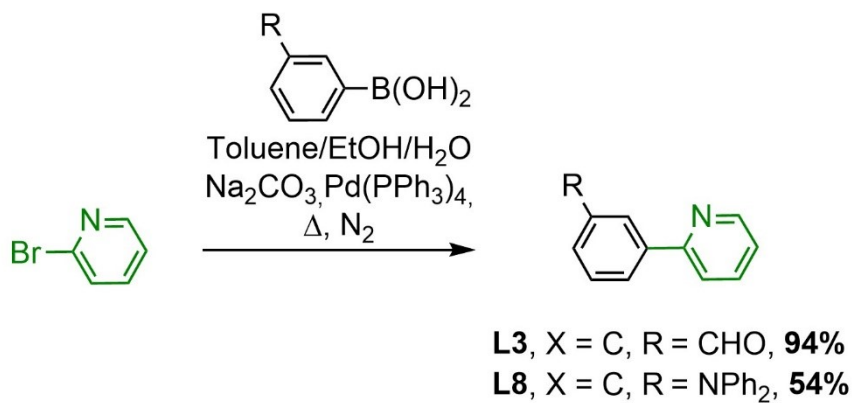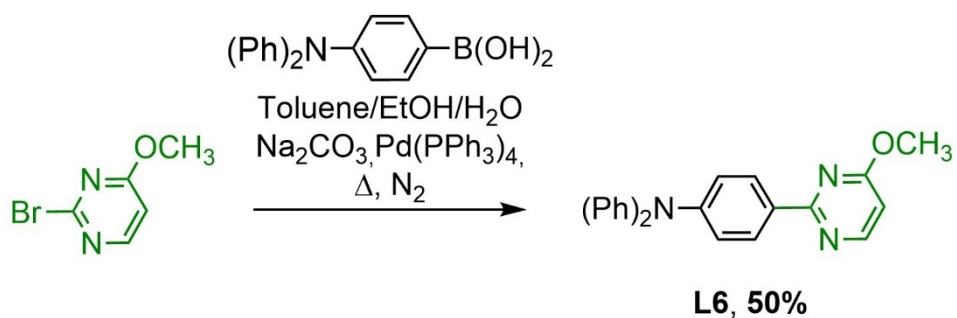

## 2- Synthesis of ligands L1-L8

**Scheme S1** : Synthesis of the C<sup>N</sup> ligands 1-8.

### Ligand 1

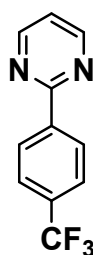

### 2-(4-(trifluoromethyl)phenyl)pyrimidine

Synthesized using general procedure **A** from 2-chloropyrimidine (139 mg, 1.22mmol, 1 eq.), (4-(trifluoromethyl)phenyl)boronic acid (300 mg, 1.58mmol, 1.3 eq.), Pd(PPh<sub>3</sub>)<sub>4</sub> (70 mg, 0.06 mmol, 0.05 eq.). The crude material was purified by column chromatography (Petroleum ether /EtOAc: 8/2) to yield the product as a white solid (145 mg, 53 %).

<sup>1</sup>H NMR (300 MHz, CDCl<sub>3</sub>) δ 8.85 (d, *J* = 4.8 Hz, 2H), 8.57 (d, *J* = 8.7 Hz, 2H), 7.75 (d, *J* = 8.5 Hz, 2H), 7.29 – 7.21 (m, 2H). <sup>13</sup>C NMR (75 MHz, CDCl<sub>3</sub>) δ 164.0, 158.0, 141.4, 132.7 (q, <sup>2</sup>J<sub>C-F</sub> = 32.5 Hz), 129.0, 126.11 (q, <sup>3</sup>J<sub>C-F</sub> = 3.74 Hz), 124.3 (q, <sup>3</sup>J<sub>C-F</sub> = 272.4 Hz), 120.4. Spectroscopic data were similar to literature.<sup>2</sup>

### Ligand 2

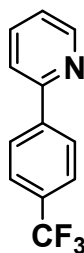

### 2-(4-(trifluoromethyl)phenyl)pyridine

Synthesized using general procedure **A** from 2-bromopyridine (166 mg, 1.05mmol, 1 eq.), (4-(trifluoromethyl)phenyl)boronic acid (300 mg, 1.58 mmol, 1.5 eq.), Pd(PPh<sub>3</sub>)<sub>4</sub> (60 mg, 0.053 mmol, 0.05 eq.). The crude material was purified by column chromatography (Petroleum ether /EtOAc: 9/1) to yield the product as a white solid (225 mg, 94 %).

<sup>1</sup>H NMR (300 MHz, CDCl<sub>3</sub>) δ 8.73 (d, *J* = 5.0 Hz, 1H), 8.11 (d, *J* = 8.1 Hz, 2H), 7.84 – 7.70 (m, 4H), 7.37 – 7.27 (m, 1H). Spectroscopic data were similar to literature.<sup>3</sup>

### Ligand 3

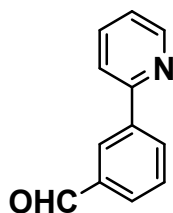

### 3-(pyridin-2-yl)benzaldehyde

Synthesized using general procedure **A** from 2-bromopyridine (243 mg, 146  $\mu$ L, 1.54 mmol, 1 eq.), (3-formylphenyl)boronic acid (300 mg, 2 mmol, 1.3 eq.), Pd(PPh<sub>3</sub>)<sub>4</sub> (89 mg, 0.077 mmol, 0.05 eq.). The crude material was purified by column chromatography (Petroleum ether /EtOAc: 8/2) to yield the product as a white solid (270 mg, 94 %).

<sup>1</sup>H NMR (300 MHz, CDCl<sub>3</sub>)  $\delta$  10.05 (s, 1H), 8.66 (dt,  $J$  = 4.9, 1.5 Hz, 1H), 8.45 (t,  $J$  = 1.8 Hz, 1H), 8.23 (m, 1H), 7.87 (m, 1H), 7.77 – 7.70 (m, 2H), 7.57 (t,  $J$  = 7.7 Hz, 1H), 7.25 – 7.20 (m, 1H). <sup>13</sup>C NMR (75 MHz, CDCl<sub>3</sub>)  $\delta$  191.7, 155.2, 149.4, 139.8, 136.6, 136.5, 132.2, 129.3, 129.0, 127.9, 122.4, 120.1. Spectroscopic data were similar to literature.<sup>4</sup>

### Ligand 4

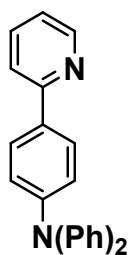

### *N,N*-diphenyl-4-(pyridin-2-yl)aniline

Synthesized using general procedure **A** from 2-bromopyridine (150 mg, 90  $\mu$ L, 0.949 mmol, 1 eq.), (4-(diphenylamino)phenyl)boronic acid (400 mg, 1.38 mmol, 1.5 eq.), Pd(PPh<sub>3</sub>)<sub>4</sub> (53 mg, 0.046 mmol, 0.05 eq.). The crude material was purified by column chromatography (Petroleum ether /EtOAc: 8/2) to yield the product as a white solid (285 mg, 95 %).

<sup>1</sup>H NMR (300 MHz, CDCl<sub>3</sub>)  $\delta$  8.71 – 8.61 (m, 1H), 7.90 – 7.83 (m, 2H), 7.76 – 7.65 (m, 2H), 7.31 – 7.27 (m, 3H), 7.25 (s, 1H), 7.16 (m, 5H), 7.13 (d,  $J$  = 2.6 Hz, 2H), 7.09 – 7.01 (m, 2H). <sup>13</sup>C NMR (75 MHz, CDCl<sub>3</sub>)  $\delta$  157.3, 149.8, 148.9, 147.7, 136.8, 133.3, 129.5, 127.9, 124.9, 123.4, 123.4, 121.6, 120.0. Spectroscopic data were similar to literature.<sup>5</sup>

### Ligand 5

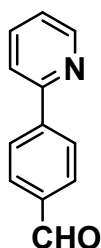

### 4-(pyridin-2-yl)benzaldehyde

Synthesized using general procedure **A** from 2-bromopyridine (260 mg, 156  $\mu$ L, 1.65 mmol, 1 eq.), (4-formylphenyl)boronic acid (800 mg, 5.34 mmol, 3 eq.), Pd(PPh<sub>3</sub>)<sub>4</sub> (237 mg, 0.205 mmol, 0.05 eq.). The crude material was purified by column chromatography (Petroleum ether /EtOAc: 8/2) to yield the product as a white solid (652 mg, 87 %).

<sup>1</sup>H NMR (300 MHz, CDCl<sub>3</sub>)  $\delta$  10.10 (s, 1H), 8.76 (dt,  $J$  = 4.8, 1.4 Hz, 1H), 8.24 – 8.14 (m, 2H), 8.01 (d,  $J$  = 8.3 Hz, 2H), 7.88 – 7.79 (m, 2H), 7.37 – 7.31 (m, 1H). <sup>13</sup>C NMR (75 MHz, CDCl<sub>3</sub>)  $\delta$  192.1, 156.1, 150.1, 145.1, 137.1, 136.6, 130.3, 127.6, 123.3, 121.3. Spectroscopic data were similar to literature.<sup>3</sup>

### Ligand 6

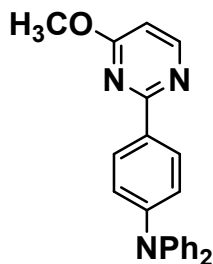

### 4-(4-methoxypyrimidin-2-yl)-N,N-diphenylaniline

Synthesized using general procedure **A** from 2-bromo-4-methoxypyrimidine (436 mg, 2.31 mmol, 1 eq.), (4-(diphenylamino)phenyl)boronic acid (1 g, 3.46 mmol, 1.5 eq.), Pd(PPh<sub>3</sub>)<sub>4</sub> (133 mg, 0.115 mmol, 0.05 eq.). The crude material was purified by column chromatography (Petroleum ether /EtOAc: 9/1) to yield the product as a yellow-white solid (407 mg, 50 %).

<sup>1</sup>H NMR (300 MHz, CDCl<sub>3</sub>)  $\delta$  8.45 (d,  $J$  = 5.7 Hz, 1H), 8.33 – 8.26 (m, 2H), 7.32 – 7.26 (m, 4H), 7.18 – 7.04 (m, 8H), 6.56 (d,  $J$  = 5.7 Hz, 1H), 4.05 (s, 3H). <sup>13</sup>C NMR (75 MHz, CDCl<sub>3</sub>)  $\delta$  169.51, 164.29, 157.5, 150.4, 147.4, 131.1, 129.5, 129.4, 125.5, 123.7, 122.2, 105.4, 53.5.



### Ligand 7

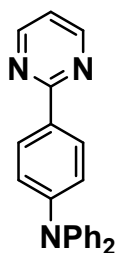

### *N,N*-diphenyl-4-(pyrimidin-2-yl)aniline

Synthesized using general procedure **A** from 2-chloropyrimidine (213 mg, 1.86 mmol, 1 eq.), (4-(diphenylamino)phenyl)boronic acid (700 mg, 2.42 mmol, 1.5 eq.), Pd(PPh<sub>3</sub>)<sub>4</sub> (108 mg, 0.093 mmol, 0.05 eq.). The crude material was purified by column chromatography (Petroleum ether /EtOAc: 9/1) to yield the product as a white solid (400 mg, 66 %).

<sup>1</sup>H NMR (300 MHz, CDCl<sub>3</sub>) δ 8.75 (d, *J* = 4.8 Hz, 2H), 8.36 – 8.26 (m, 2H), 7.36 – 7.27 (m, 5H), 7.18 – 7.04 (m, 8H). <sup>13</sup>C NMR (75 MHz, CDCl<sub>3</sub>) δ 164.7, 157.3, 150.5, 147.4, 131.0, 129.5, 129.3, 125.4, 123.8, 122.3, 118.4. Spectroscopic data were similar to literature.<sup>6</sup>

### Ligand 8

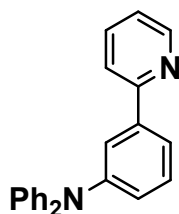

### *N,N*-diphenyl-3-(pyridin-2-yl)aniline

Synthesized using general procedure **A** from 2-bromopyridine (374 mg, 226 μL, 2.37 mmol, 1 eq.), (3-(diphenylamino)phenyl)boronic acid (891 mg, 3.08 mmol, 1.3 eq.), Pd(PPh<sub>3</sub>)<sub>4</sub> (27 mg, 0.118 mmol, 0.05 eq.). The crude material was purified by column chromatography (Petroleum ether /EtOAc: 7/3) to yield the product as a yellow-white solid (535 mg, 54 %).

<sup>1</sup>H NMR (300 MHz, CDCl<sub>3</sub>) δ 8.69 – 8.63 (m, 1H), 7.77 – 7.59 (m, 4H), 7.37 (t, *J* = 7.9 Hz, 1H), 7.32 – 7.23 (m, 5H), 7.18 – 7.11 (m, 5H), 7.07 – 7.00 (m, 2H). <sup>13</sup>C NMR (75 MHz, CDCl<sub>3</sub>) δ 157.4, 149.7, 148.5, 148.0, 140.9, 136.8, 129.8, 129.40, 128.4, 125.0, 124.4, 122.9, 122.3, 121.7, 120.8. Mass spectroscopic data were similar to literature.<sup>7</sup>

### 3- Synthesis of precursors C1-2 and A1-7

#### Cationic platinum complex C1

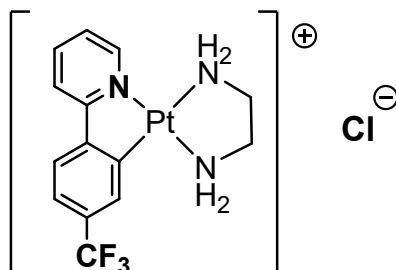

Synthesized using general procedure C from platinum (II) dimers  $[\text{Pt}(\text{C}^{\wedge}\text{N})_2\text{Cl}]_2$  (650 mg, 0.718 mmol, 1 eq.), ethylenediamine (129 mg, 144  $\mu\text{L}$ , 2.15 mmol, 3 eq.). Yellow solid (298 mg, 86%).

$^1\text{H}$  NMR (300 MHz, DMSO)  $\delta$  8.71 (d,  $J = 5.8$  Hz, 1H), 8.20 (d,  $J = 4.6$  Hz, 2H), 7.93 (d,  $J = 8.1$  Hz, 1H), 7.61 (s, 1H), 7.55 – 7.41 (m, 2H), 6.27 (s, 2H), 5.48 (s, 2H), 2.68 (s, 4H). Spectroscopic data were similar to literature.<sup>1a,8</sup>

#### Cationic platinum complex C2

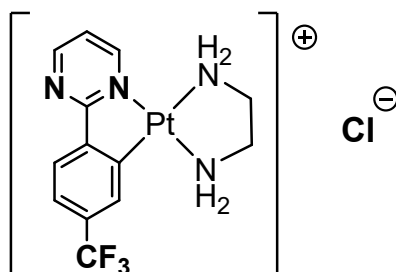

Synthesized using general procedure C from platinum (II) dimers  $[\text{Pt}(\text{C}^{\wedge}\text{N})_2\text{Cl}]_2$  (220 mg, 0.242 mmol, 1 eq.), ethylenediamine (44 mg, 49  $\mu\text{L}$ , 0.727 mmol, 3 eq.). Yellow solid (193 mg, 77%).

$^1\text{H}$  NMR (300 MHz, DMSO)  $\delta$  9.22 – 9.04 (m, 2H), 7.92 (d,  $J = 8.0$  Hz, 1H), 7.69 (s, 1H), 7.58 (t,  $J = 5.3$  Hz, 1H), 7.49 (d,  $J = 8.1$  Hz, 1H), 6.42 (s, 2H), 5.60 (s, 2H), 2.68 (s, 4H).  $^{13}\text{C}$  NMR (75 MHz, DMSO)  $\delta$  172.8, 159.3, 158.7, 145.9, 144.5, 131 (q,  $^2J_{\text{C-F}} = 31$  Hz), 129.8 (q,  $^3J_{\text{C-F}} = 3.62$  Hz), 126.6, 124.3 (q,  $^3J_{\text{C-F}} = 271.3$  Hz), 120.5, 120.3, 47.9, 43.7. HRMS (ESI)  $m/z$  calculated for  $\text{C}^+$  ( $\text{C}_{13}\text{H}_{14}\text{N}_4\text{F}_3^{195}\text{Pt}$ ) = 478.0818, found = 478.0812.

### Anionic platinum complex A1

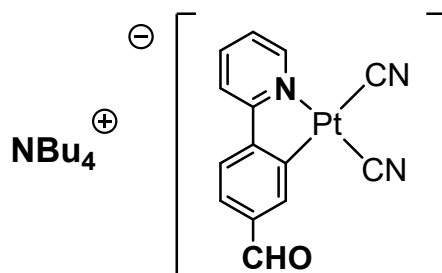

Synthesized using general procedure **D** from platinum (II) dimers [Pt(C<sup>^</sup>N)<sub>2</sub>Cl]<sub>2</sub> (157 mg, 0.190 mmol, 1eq.), tetrabutylammonium cyanide (204 mg, 0.761mmol, 4 eq). Yellow solid (54 mg, 42 %).

<sup>1</sup>H NMR (300 MHz, CDCl<sub>3</sub>) δ 10.07 (s, 1H), 9.60 – 9.46 (m, 1H), 8.77 – 8.57 (m, 1H), 7.97 – 7.87 (m, 1H), 7.81 (d, *J* = 7.9 Hz, 1H), 7.73 – 7.61 (m, 2H), 7.26 – 7.19 (m, 1H), 3.51 – 3.34 (m, 8H), 1.80 – 1.69 (m, 8H), 1.56 – 1.41 (m, 8H), 1.01 (t, *J* = 7.3 Hz, 12H). Spectroscopic data were similar to literature.<sup>7</sup>

### Anionic platinum complex A2

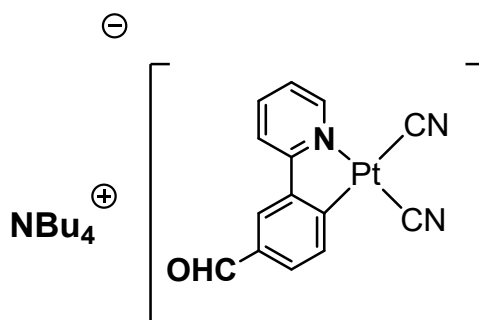

Synthesized using general procedure **D** from platinum (II) dimers [Pt(C<sup>^</sup>N)<sub>2</sub>Cl]<sub>2</sub> (250 mg, 0.303 mmol, 1eq), tetrabutylammonium cyanide (285 mg, 1.06, 4 eq). Yellow solid (90 mg, 44 %).

<sup>1</sup>H NMR (300 MHz, CDCl<sub>3</sub>) δ 9.94 (s, 1H), 9.49 (d, *J* = 5.6 Hz, 1H), 8.41 (d, *J* = 7.6 Hz, 1H), 8.02 (d, *J* = 1.6 Hz, 1H), 7.97 – 7.80 (m, 2H), 7.61 (dd, *J* = 7.6, 1.7 Hz, 1H), 7.23 – 7.14 (m, 1H), 3.48 – 3.27 (m, 8H), 1.79 – 1.66 (m, 8H), 1.53 – 1.39 (m, 8H), 0.98 (t, *J* = 7.3 Hz, 12H). <sup>13</sup>C NMR (75 MHz, DMSO) δ 192.8, 168.6, 166.9, 153.5, 147.9, 146.1, 139.5, 139.0, 132.8, 132.7, 123.6, 122.8, 119.1, 117.7, 59.3, 24.3, 19.9, 13.8. HRMS (ESI) *m/z* calculated for A<sup>-</sup> (C<sub>14</sub>H<sub>8</sub>N<sub>3</sub>O<sup>195</sup>Pt) = 429.0315, found = 429.0321.

### Anionic platinum complex A3

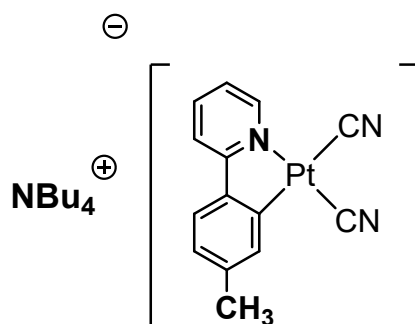

Synthesized using general procedure **D** from platinum (II) dimers  $[\text{Pt}(\text{C}^{\wedge}\text{N})_2\text{Cl}]_2$  (92 mg, 0.115 mmol, 1eq.), tetrabutylammonium cyanide (123 mg, 0.459 mmol, 4 eq.). Yellow solid (31 mg, 65 %).

$^1\text{H}$  NMR (300 MHz,  $\text{CDCl}_3$ )  $\delta$  9.41 (d,  $J = 5.7$  Hz, 1H), 8.02 (s, 1H), 7.76 (t,  $J = 7.9$  Hz, 1H), 7.67 – 7.59 (m, 1H), 7.40 (d,  $J = 7.9$  Hz, 1H), 7.03 (t,  $J = 6.6$  Hz, 1H), 6.89 (d,  $J = 8.5$  Hz, 1H), 3.44 – 3.33 (m, 8H), 2.32 (s, 3H), 1.77 – 1.65 (m, 8H), 1.50 – 1.41 (m, 8H), 0.98 (t,  $J = 7.3$  Hz, 12H).  $^{13}\text{C}$  NMR (75 MHz,  $\text{CDCl}_3$ )  $\delta$  168.4, 157.4, 153.1, 144.1, 140.5, 139.6, 138.24, 124.6, 123.1, 122.1, 122.0, 118.7, 118.1, 59.1, 24.1, 21.7, 19.7, 13.7.\* HRMS (ESI)  $m/z$  calculated for  $\text{A}^-$  ( $\text{C}_{14}\text{H}_{10}\text{N}_3^{195}\text{Pt}$ ) = 415.0523, found = 415.0528.

### Anionic platinum complex A4

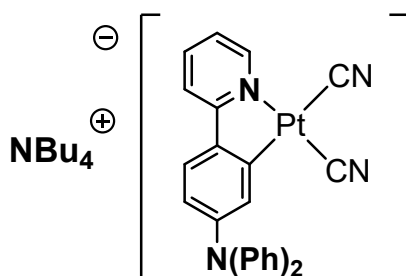

Synthesized using general procedure **D** from platinum (II) dimers  $[\text{Pt}(\text{C}^{\wedge}\text{N})_2\text{Cl}]_2$  (300mg, 0.272 mmol, 1eq.), tetrabutylammonium cyanide (292 mg, 1.09 mmol, 4 eq.). Yellow solid (149 mg, 67 %).

$^1\text{H}$  NMR (300 MHz,  $\text{CDCl}_3$ )  $\delta$  9.40 (d,  $J = 6.0$  Hz, 1H), 7.97 (d,  $J = 2.3$  Hz, 1H), 7.76 (t,  $J = 7.8$  Hz, 1H), 7.58 (d,  $J = 8.2$  Hz, 1H), 7.43 (d,  $J = 8.3$  Hz, 1H), 7.22 (t,  $J = 7.6$  Hz, 4H), 7.12 (d,  $J = 8.1$  Hz, 4H), 6.99 (dt,  $J = 14.6, 6.7$  Hz, 3H), 6.81 – 6.73 (m, 1H), 3.37 (q,  $J = 11.4$  Hz, 8H), 1.71 (d,  $J = 10.1$  Hz, 8H), 1.46 (h,  $J = 7.4$  Hz, 8H), 0.99 (t,  $J = 7.3$  Hz, 12H).  $^{13}\text{C}$  NMR (75 MHz,  $\text{CDCl}_3$ )  $\delta$  167.9, 158.9, 153.2, 149.7, 148.1, 147.3, 141.9, 138.3, 134.6, 129.1, 124.3, 122.4, 121.7, 120.5, 120.5, 118.2, 59.3, 24.3, 19.9, 13.8.\* HRMS (ESI)  $m/z$  calculated for  $\text{A}^-$  ( $\text{C}_{25}\text{H}_{17}\text{N}_4^{195}\text{Pt}$ ) = 568.1101, found = 568.1106.

### Anionic platinum complex A5

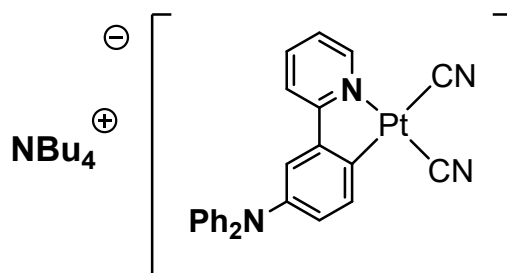

Synthesized using general procedure **D** from platinum (II) dimers  $[\text{Pt}(\text{C}^{\wedge}\text{N})_2\text{Cl}]_2$  (200 mg, 0.172 mmol, 1 eq.), tetrabutylammonium cyanide (184 mg, 0.686 mmol, 4 eq.). Yellow solid (128 mg, 89 %).

$^1\text{H}$  NMR (300 MHz,  $\text{CDCl}_3$ )  $\delta$  9.43 (d,  $J = 5.7$  Hz, 1H), 8.10 (d,  $J = 8.0$  Hz, 1H), 7.73 (t,  $J = 6.9$  Hz, 1H), 7.47 (d,  $J = 7.9$  Hz, 1H), 7.29 (d,  $J = 2.5$  Hz, 1H), 7.19 (t,  $J = 7.9$  Hz, 5H), 7.05 (s, 5H), 7.00 – 6.89 (m, 3H), 3.45 – 3.32 (m, 8H), 1.73 – 1.62 (m, 8H), 1.52 – 1.38 (m, 8H), 0.97 (t,  $J = 7.3$  Hz, 12H).  $^{13}\text{C}$  NMR (75 MHz,  $\text{CDCl}_3$ )  $\delta$  167.9, 153.4, 153.0, 148.3, 147.4, 144.0, 140.6, 139.0, 129.9, 129.1, 125.4, 123.2, 122.9, 121.9, 121.2, 118.8, 118.2, 59.3, 24.3, 19.9, 13.9. HRMS (ESI)  $m/z$  calculated for  $\text{A}^- (\text{C}_{25}\text{H}_{17}\text{N}_4^{195}\text{Pt}) = 568.1101$ , found = 568.1107.

### Anionic platinum complex A6

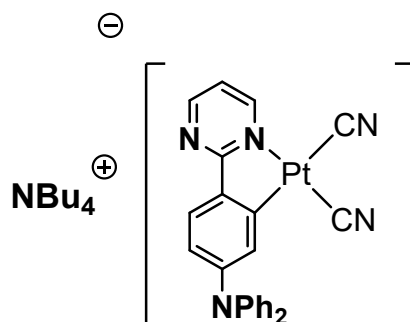

Synthesized using general procedure **D** from platinum (II) dimers  $[\text{Pt}(\text{C}^{\wedge}\text{N})_2\text{Cl}]_2$  (250 mg, 0.226 mmol, 1 eq.), tetrabutylammonium cyanide (243 mg, 0.904 mmol, 4 eq.). Yellow solid (104 mg, 56 %).

$^1\text{H}$  NMR (300 MHz,  $\text{CDCl}_3$ )  $\delta$  9.46 (dd,  $J = 5.8, 2.3$  Hz, 1H), 8.80 – 8.67 (m, 1H), 7.93 – 7.83 (m, 1H), 7.79 (d,  $J = 8.4$  Hz, 1H), 7.26 – 7.17 (m, 4H), 7.17 – 7.05 (m, 4H), 7.04 – 6.87 (m, 3H), 6.79 – 6.71 (m, 1H), 3.37 – 3.24 (m, 8H), 1.71 – 1.60 (m, 8H), 1.50 – 1.38 (m, 8H), 0.98 (t,  $J = 7.2$  Hz, 12H).  $^{13}\text{C}$  NMR (75 MHz,  $\text{CDCl}_3$ )  $\delta$  176.2, 159.8, 158.6, 158.1, 152.1, 148.2, 146.3, 138.4, 133.24, 129.6, 128.9, 126.7, 125.4, 123.4, 120.3, 117.6, 60.7, 26.4, 19.8, 13.1.\* HRMS (ESI)  $m/z$  calculated for  $\text{A}^- (\text{C}_{24}\text{H}_{16}\text{N}_5^{195}\text{Pt}) = 569.1054$ , found = 569.1062.

### Anionic platinum complex A7

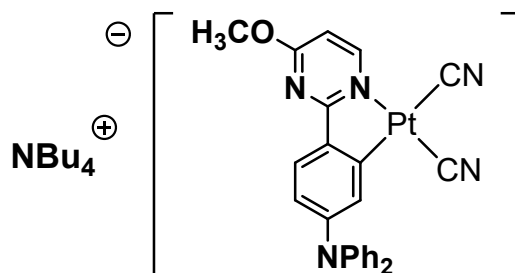

Synthesized using general procedure **D** from platinum (II) dimers  $[\text{Pt}(\text{C}^{\wedge}\text{N})_2\text{Cl}]_2$  (200 mg, 0.171 mmol, 1eq.), tetrabutylammonium cyanide (184 mg, 0.686 mmol, 4 eq. Yellow solid (94 mg, 65 %).

$^1\text{H}$  NMR (300 MHz,  $\text{CDCl}_3$ )  $\delta$  9.08 (d,  $J = 6.6$  Hz, 1H), 7.87 (d,  $J = 2.3$  Hz, 1H), 7.77 (d,  $J = 8.4$  Hz, 1H), 7.24 – 7.17 (m, 4H), 7.15 – 7.08 (m, 4H), 6.97 (t,  $J = 7.2$  Hz, 2H), 6.73 (dd,  $J = 8.4, 2.3$  Hz, 1H), 6.38 (d,  $J = 6.5$  Hz, 1H), 4.05 (s, 3H), 3.39 – 3.29 (m, 8H), 1.75 – 1.65 (m, 8H), 1.45 (q,  $J = 7.4$  Hz, 8H), 0.98 (t,  $J = 7.3$  Hz, 12H).  $^{13}\text{C}$  NMR (75 MHz,  $\text{CDCl}_3$ )  $\delta$  176.3, 169.3, 159.2, 151.6, 147.9, 145.5, 138.6, 133.0, 129.2, 128.4, 128.2, 124.8, 124.0, 122.9, 119.8, 104.4, 59.3, 54.2, 24.3, 19.9, 13.9. HRMS (ESI)  $m/z$  calculated for  $\text{A}^-$  ( $\text{C}_{25}\text{H}_{18}\text{N}_5\text{O}^{195}\text{Pt}$ ) = 599.1159, found = 569.1166.

## 4- Synthesis of soft salts S1-9

### Soft Salt S0

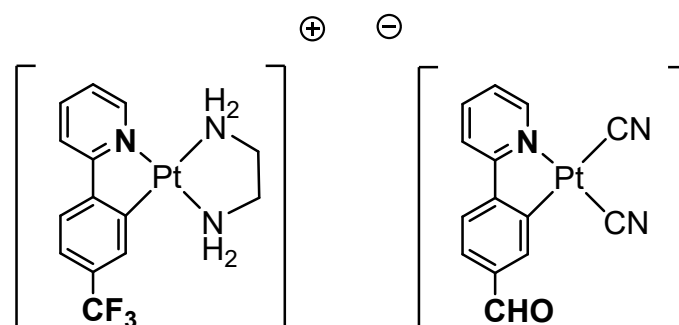

Synthesized using general procedure E from **C1** (20 mg, 0.039 mmol, 1.1 eq), **A1** (24 mg, 0.036 mmol, 1 eq.). Red solid (24 mg, 75 %).

$^1\text{H}$  NMR (300 MHz, DMSO)  $\delta$  9.96 (s, 1H), 9.29 (d,  $J = 5.8$  Hz, 1H), 8.66 (d,  $J = 5.7$  Hz, 1H), 8.43 (d,  $J = 23.9$  Hz, 1H), 8.25 – 8.12 (m, 4H), 7.99 – 7.87 (m, 2H), 7.58 (d,  $J = 6.5$  Hz, 2H), 7.54 – 7.40 (m, 3H), 6.22 (s, 2H), 5.38 (s, 2H), 2.68 (s, 4H). Spectroscopic data were similar to literature.<sup>7</sup>

### Soft Salt S1

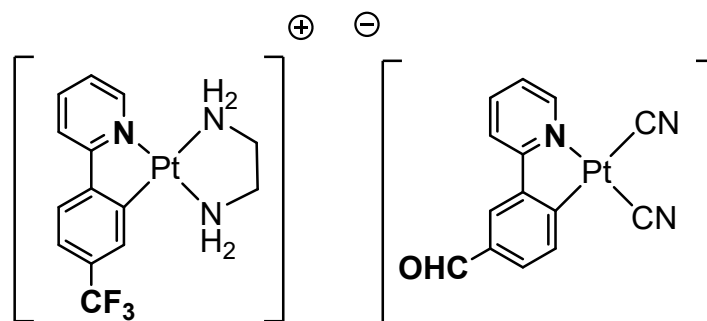

Synthesized using general procedure E from **C1** (30 mg, 0.059 mmol, 1.1 eq.), **A2** (36 mg, 0.053 mmol, 1 eq.). Red solid (18 mg, 56 %).

$^1\text{H}$  NMR (300 MHz, DMSO)  $\delta$  9.93 (s, 1H), 9.27 (d,  $J = 5.8$  Hz, 1H), 8.66 (d,  $J = 5.8$  Hz, 1H), 8.18 (dt,  $J = 15.9, 8.0$  Hz, 6H), 7.92 (d,  $J = 8.1$  Hz, 1H), 7.61 (d,  $J = 8.8$  Hz, 2H), 7.48 (d,  $J = 8.9$  Hz, 3H), 6.22 (s, 2H), 5.38 (s, 2H).  $^{13}\text{C}$  NMR (75 MHz, DMSO)  $\delta$  193.1, 166.1, 165.2, 163.0, 159.3, 152.8, 151.8, 149.7, 148.1, 145.2, 144.1, 140.8, 140.8, 140.2, 138.9, 132.9, 130.6 (q,  $^2J_{\text{C-F}} = 30.5$  Hz), 130.2, 129.6, 125.0, 124.5 (q,  $^3J_{\text{C-F}} = 3.5$  Hz), 123.5, 122.3 (q,  $^1J_{\text{C-F}} = 276.7$  Hz), 121.0, 120.8, 120.4, 48.2, 44.1.\* HRMS (ESI)  $m/z$  calculated for  $\text{C}^+$  ( $\text{C}_{14}\text{H}_{15}\text{N}_3\text{F}_3^{195}\text{Pt}$ ) = 477.0866, found = 477.0859;  $\text{A}^-$  ( $\text{C}_{14}\text{H}_8\text{N}_3\text{O}^{195}\text{Pt}$ ) = 429.0315, found = 429.0321.

### Soft Salt S2

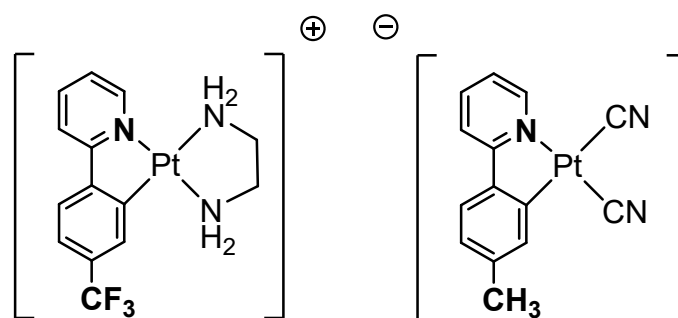

Synthesized using general procedure E from **C1** (20 mg, 0.039 mmol, 1.1 eq.), **A3** (23 mg, 0.035 mmol, 1 eq.). Red solid (20 mg, 63 %).

$^1\text{H}$  NMR (300 MHz, DMSO)  $\delta$  9.18 (d,  $J = 5.6$  Hz, 1H), 8.66 (d,  $J = 5.8$  Hz, 1H), 8.20 (d,  $J = 4.5$  Hz, 2H), 8.05 – 7.89 (m, 3H), 7.72 (s, 1H), 7.62 – 7.54 (m, 2H), 7.53 – 7.41 (m, 2H), 7.32 (t,  $J = 6.8$  Hz, 1H), 6.91 – 6.81 (m, 1H), 6.22 (s, 2H), 5.38 (s, 2H), 2.68 (s, 4H), 2.25 (s, 3H).  $^{13}\text{C}$  NMR (75 MHz, DMSO)  $\delta$  167.3, 164.7, 157.9, 152.0, 151.3, 149.2, 144.7, 144.4, 144.1, 140.3, 139.4, 139.1, 138.7, 129.7 (q,  $^3J_{\text{C-F}} = 3.75$  Hz), 128.9 (q,  $^2J_{\text{C-F}} = 30.7$  Hz), 124.6, 124.3 (q,  $^1J_{\text{C-F}} = 273$  Hz), 124.2, 124.1, 123.5, 123.0, 120.5, 120.4, 118.9, 115.8, 47.8, 43.66, 21.4. HRMS (ESI)  $m/z$  calculated for  $\text{C}^+$  ( $\text{C}_{14}\text{H}_{15}\text{N}_3\text{F}_3^{195}\text{Pt}$ ) = 477.0866, found = 477.0858;  $\text{A}^-$  ( $\text{C}_{14}\text{H}_{10}\text{N}_3^{195}\text{Pt}$ ) = 415.0523, found = 415.0528.

### Soft Salt S3

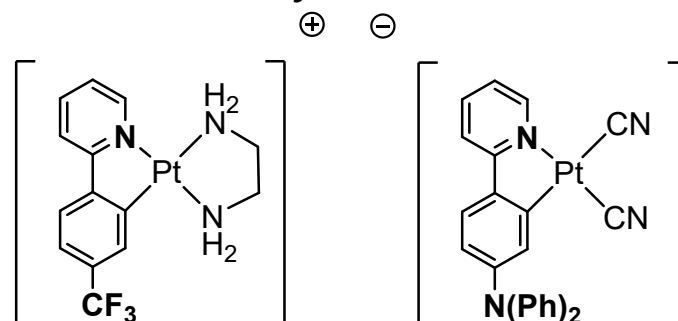

Synthesized using general procedure E from **C1** (20 mg, 0.039 mmol, 1.1 eq.), **A4** (29 mg, 0.035 mmol, 1 eq.). Yellow solid (35 mg, 94 %).

$^1\text{H}$  NMR (300 MHz, DMSO)  $\delta$  9.16 (d,  $J = 5.7$  Hz, 1H), 8.66 (d,  $J = 5.8$  Hz, 1H), 8.20 (d,  $J = 4.5$  Hz, 2H), 8.11 – 7.76 (m, 4H), 7.75 – 7.63 (m, 2H), 7.61 (d,  $J = 6.2$  Hz, 1H), 7.55 – 7.41 (m, 2H), 7.40 – 7.19 (m, 5H), 7.12 – 6.96 (m, 5H), 6.66 – 6.55 (m, 1H), 6.23 (s, 2H), 5.38 (s, 2H), 2.68 (s, 4H).  $^{13}\text{C}$  NMR (75 MHz, DMSO)  $\delta$  166.7, 164.7, 159.5, 151.9, 151.4, 149.3, 148.6, 147.3, 144.7, 143.8, 141.5, 140.4, 139.3, 133.0, 129.7 (q,  $^3J_{\text{C-F}} = 3.75$  Hz), 129.4, 129.0 (q,  $^2J_{\text{C-F}} = 30.3$  Hz), 124.9, 124.6 (q,  $^1J_{\text{C-F}} = 252.1$  Hz), 124.6, 124.1, 123.8, 122.7, 122.6, 120.6, 120.4, 119.3, 118.9, 115.2, 47.8, 43.7. HRMS (ESI)  $m/z$  calculated for  $\text{C}^+$  ( $\text{C}_{14}\text{H}_{13}\text{N}_3\text{F}_3^{195}\text{Pt}$ ) = 477.0866, found = 477.0858;  $\text{A}^-$  ( $\text{C}_{25}\text{H}_{17}\text{N}_4^{195}\text{Pt}$ ) = 568.1101, found = 568.1106.



### Soft Salt S4

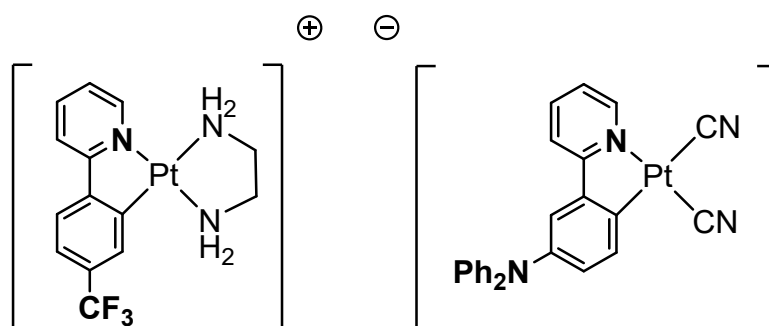

Synthesized using general procedure E from **C1** (30 mg, 0.059 mmol, 1.1 eq.), **A7** (43 mg, 0.053 mmol, 1 eq.). Yellow solid (48 mg, 86 %).

$^1\text{H}$  NMR (300 MHz, DMSO)  $\delta$  9.31 – 9.12 (m, 1H), 8.79 – 8.58 (m, 1H), 8.29 – 8.13 (m, 2H), 8.05 – 7.78 (m, 4H), 7.65 – 7.56 (m, 1H), 7.52 – 7.40 (m, 3H), 7.40 – 7.34 (m, 1H), 7.30 – 7.16 (m, 4H), 7.12 – 6.79 (m, 7H), 6.22 (s, 2H), 5.38 (s, 2H), 2.69 (s, 4H).  $^{13}\text{C}$  NMR (75 MHz, DMSO)  $\delta$  166.4, 164.7, 154.2, 152.2, 151.3, 149.2, 148.2, 147.5, 144.7, 144.0, 143.0, 140.3, 139.6, 139.3, 129.77 (q,  $^3J_{\text{C-F}}=3.75$  Hz), 129.4 (q,  $^2J_{\text{C-F}}=38.07$  Hz), 129.2, 128.4, 124.9, 124.0, 123.9, 123.1 (q,  $^1J_{\text{C-F}}=237$  Hz), 122.2, 121.8, 120.5, 120.3, 120.3, 119.4, 115.1, 47.8, 43.7. HRMS (ESI)  $m/z$  calculated for  $\text{C}^+$  ( $\text{C}_{14}\text{H}_{15}\text{N}_3\text{F}_3^{195}\text{Pt}$ ) = 477.0866, found = 477.0860;  $\text{A}^-$  ( $\text{C}_{25}\text{H}_{17}\text{N}_4^{195}\text{Pt}$ ) = 568.1101, found = 568.1107.

### Soft Salt S5

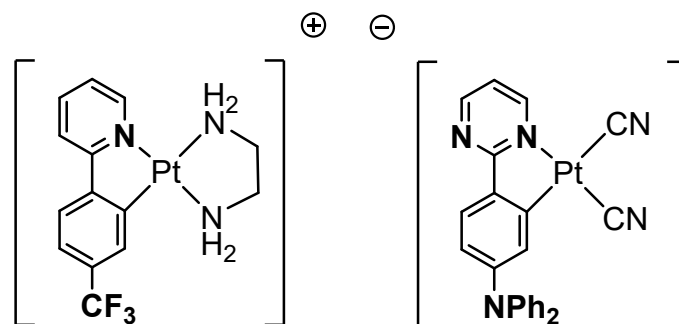

Synthesized using general procedure E from **C1** (30 mg, 0.059 mmol, 1.1 eq.), **A6** (43 mg, 0.053 mmol, 1 eq.). Yellow solid (43 mg, 77 %).

$^1\text{H}$  NMR (300 MHz, DMSO)  $\delta$  9.26 (d,  $J=5.7$  Hz, 1H), 8.94 (s, 1H), 8.66 (s, 1H), 8.19 (s, 2H), 7.97 – 7.89 (m, 1H), 7.72 (d,  $J=8.3$  Hz, 1H), 7.60 (d,  $J=5.8$  Hz, 2H), 7.55 – 7.42 (m, 3H), 7.39 – 7.27 (m, 5H), 7.09 – 7.01 (m, 5H), 6.61 (d,  $J=8.6$  Hz, 1H), 6.21 (s, 2H), 5.37 (s, 2H), 2.68 (s, 4H).  $^{13}\text{C}$  NMR (75 MHz, DMSO)  $\delta$  174.2, 164.7, 158.9, 158.7, 158.3, 151.3, 150.5, 149.2, 147.0, 144.7, 142.3, 140.3, 137.5, 131.3, 129.4, 129.4 (q,  $^2J_{\text{C-F}}=31.4$  Hz), 129.2 (q,  $^3J_{\text{C-F}}=3.75$  Hz), 127.8, 126.3, 124.6, 124.5, 123.3, 122.5, 122.3 (q,  $^1J_{\text{C-F}}=262.1$  Hz), 120.5, 120.3, 118.6, 118.4, 47.8, 43.7.\* HRMS (ESI)  $m/z$  calculated for  $\text{C}^+$  ( $\text{C}_{14}\text{H}_{15}\text{N}_3\text{F}_3^{195}\text{Pt}$ ) = 477.0866, found = 477.0860;  $\text{A}^-$  ( $\text{C}_{24}\text{H}_{16}\text{N}_5^{195}\text{Pt}$ ) = 569.1054, found = 569.1062.

### Soft Salt S6

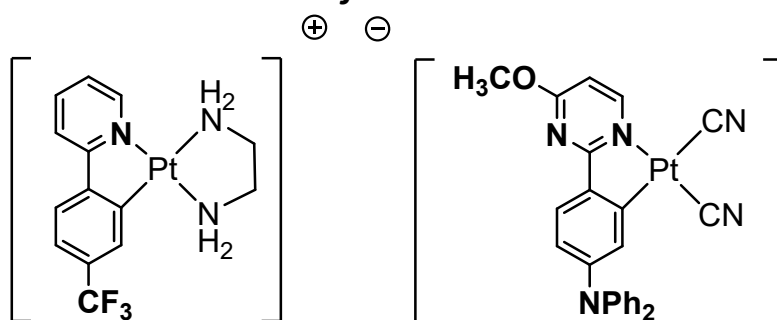

Synthesized using general procedure **E** from **C1** (30 mg, 0.059 mmol, 1.1 eq.), **A5** (45 mg, 0.053 mmol, 1 eq.). Yellow solid (30 mg, 52 %).

$^1\text{H}$  NMR (300 MHz, DMSO)  $\delta$  9.16 (d,  $J = 5.7$  Hz, 1H), 8.66 (d,  $J = 5.9$  Hz, 1H), 8.19 (d,  $J = 4.5$  Hz, 2H), 7.99 (t,  $J = 7.7$  Hz, 1H), 7.91 (t,  $J = 9.8$  Hz, 2H), 7.65 (s, 1H), 7.60 (d,  $J = 6.0$  Hz, 1H), 7.52 – 7.42 (m, 2H), 7.34 – 7.23 (m, 5H), 7.04 – 6.97 (m, 5H), 6.60 (d,  $J = 8.3$  Hz, 1H), 6.22 (s, 2H), 5.37 (s, 2H), 3.50 (s, 3H), 2.68 (s, 4H).  $^{13}\text{C}$  NMR (75 MHz, DMSO)  $\delta$  167.2, 165.2, 156.0, 152.4, 151.8, 149.7, 149.0, 147.8, 145.2, 144.2, 142.0, 140.8, 139.7, 133.5, 132.7, 130.1 (q,  $^3J_{\text{C-F}} = 3.9$  Hz), 129.8, 125.3, 124.8 (q,  $^2J_{\text{C-F}} = 40$  Hz), 124.2, 123.1, 123.0, 121.2 (q,  $^1J_{\text{C-F}} = 278.4$  Hz), 121.0, 120.8, 119.7, 115.5, 100.4, 85.0, 48.3, 44.1.\* HRMS (ESI)  $m/z$  calculated for  $\text{C}^+$  ( $\text{C}_{14}\text{H}_{15}\text{N}_3\text{F}_3^{195}\text{Pt}$ ) = 477.0866, found = 477.0859;  $\text{A}^-$  ( $\text{C}_{25}\text{H}_{18}\text{N}_5\text{O}^{195}\text{Pt}$ ) = 599.1159, found = 599.1166.

### Soft Salt S7

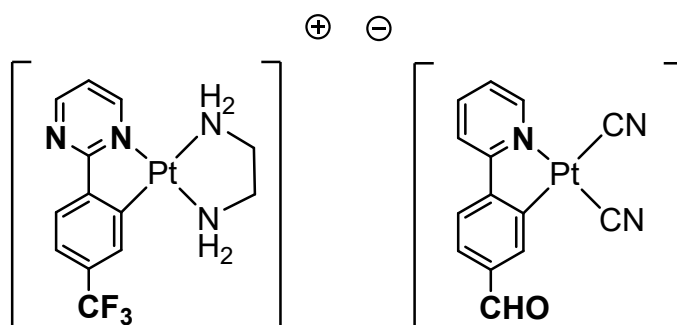

Synthesized using general procedure **E** from **C2** (20 mg, 0.039 mmol, 1.1 eq.), **A1** (24 mg, 0.036 mmol, 1 eq.). Red solid (23 mg, 48 %).

$^1\text{H}$  NMR (300 MHz, DMSO)  $\delta$  9.95 (s, 1H), 9.28 (s, 1H), 9.12 (s, 1H), 8.98 (s, 1H), 8.34 (d,  $J = 23.1$  Hz, 1H), 8.17 (s, 2H), 7.92 (d,  $J = 7.5$  Hz, 2H), 7.58 (t,  $J = 27.5$  Hz, 5H), 6.34 (s, 2H), 5.38 (s, 2H), 2.70 (s, 4H).  $^{13}\text{C}$  NMR (75 MHz, DMSO)  $\delta$  194.2, 173.3, 165.9, 163.3, 159.9, 158.9, 158.9, 158.5, 153.1, 153.0, 146.4, 144.6, 140.4, 140.0, 139.4, 136.7, 131.3 (q,  $^2J_{\text{C-F}} = 31$  Hz), 130.1 (q,  $^3J_{\text{C-F}} = 3.37$  Hz), 127.2, 125.5, 125.4, 122.6 (q,  $^1J_{\text{C-F}} = 245.01$  Hz) 121.2, 121.1, 120.8, 48.3, 44.2.\* HRMS (ESI)  $m/z$  calculated for  $\text{C}^+$  ( $\text{C}_{13}\text{H}_{14}\text{N}_4\text{F}_3^{195}\text{Pt}$ ) = 478.0818, found = 478.0812;  $\text{A}^-$  ( $\text{C}_{14}\text{H}_8\text{N}_3\text{O}^{195}\text{Pt}$ ) = 429.0315, found = 429.0320.

### Soft Salt S8

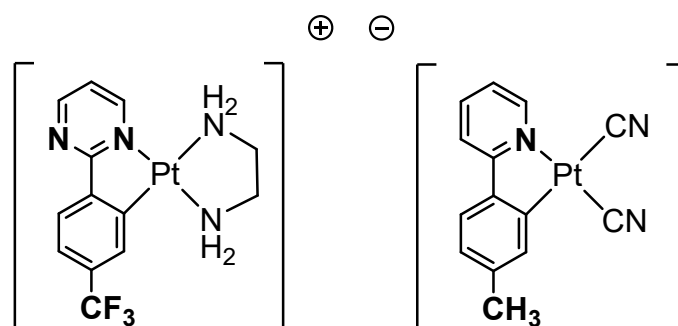

Synthesized using general procedure E from **C2** (20 mg, 0.039 mmol, 1.1 eq.), **A1** (23 mg, 0.035 mmol, 1 eq.). Red solid (25 mg, 79 %).

<sup>1</sup>H NMR (300 MHz, DMSO) δ 9.25 – 9.08 (m, 2H), 8.99 (d, *J* = 5.8 Hz, 1H), 8.08 – 7.88 (m, 3H), 7.78 – 7.44 (m, 5H), 7.31 (t, *J* = 6.5 Hz, 1H), 6.86 (d, *J* = 7.9 Hz, 1H), 6.35 (s, 2H), 5.40 (s, 2H), 2.70 (s, 4H), 2.25 (s, 3H). <sup>13</sup>C NMR (75 MHz, DMSO) δ 173.3, 167.8, 159.9, 158.9, 158.4, 152.4, 146.4, 144.9, 144.7, 144.5, 139.8, 139.5, 139.2, 131.3 (q, <sup>2</sup>*J*<sub>C-F</sub> = 31 Hz), 130.2 (q, <sup>3</sup>*J*<sub>C-F</sub> = 3.9 Hz), 127.2, 124.7 (q, <sup>1</sup>*J*<sub>C-F</sub> = 271.6 Hz) 124.6, 123.9, 123.5, 121.0, 120.8, 119.3, 116.2, 48.3, 44.2, 21.9. HRMS (ESI) *m/z* calculated for C<sup>+</sup> (C<sub>13</sub>H<sub>14</sub>N<sub>4</sub>F<sub>3</sub><sup>195</sup>Pt) = 478.0818, found = 478.0814; A<sup>-</sup> (C<sub>14</sub>H<sub>10</sub>N<sub>3</sub><sup>195</sup>Pt) = 415.0523, found = 415.0528.

### Soft Salt S9

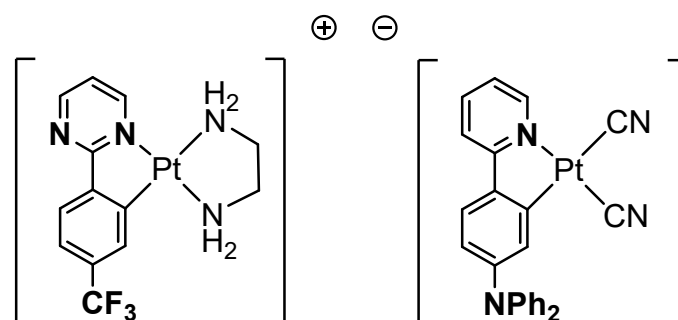

Synthesized using general procedure E from **C2** (20 mg, 0.039 mmol, 1.1 eq.), **A4** (29 mg, 0.035 mmol, 1 eq.). Yellow solid (29 mg, 78 %).

<sup>1</sup>H NMR (300 MHz, DMSO) δ 9.30 – 9.07 (m, 2H), 9.07 – 8.88 (m, 1H), 8.12 – 7.82 (m, 3H), 7.77 – 7.44 (m, 5H), 7.42 – 7.19 (m, 5H), 7.13 – 6.87 (m, 6H), 6.67 – 6.51 (m, 1H), 6.46 – 6.19 (m, 2H), 5.38 (s, 2H), 2.69 (s, 4H). <sup>13</sup>C NMR (75 MHz, DMSO) δ 172.8, 166.7, 159.5, 159.4, 158.4, 151.9, 148.5, 147.3, 145.9, 144.2, 143.7, 141.5, 139.2, 133.0, 130.8 (q, <sup>2</sup>*J*<sub>C-F</sub> = 30.2 Hz) 129.7 (q, <sup>3</sup>*J*<sub>C-F</sub> = 3.9 Hz), 129.3, 126.7, 124.8, 124.1, 124.2 (q, <sup>1</sup>*J*<sub>C-F</sub> = 271.5 Hz), 123.7, 122.6, 122.5, 120.6, 120.4, 119.2, 118.8, 115.1, 47.8, 43.7. HRMS (ESI) *m/z* calculated for C<sup>+</sup> (C<sub>13</sub>H<sub>14</sub>N<sub>4</sub>F<sub>3</sub><sup>195</sup>Pt) = 478.0818, found = 478.0814; A<sup>-</sup> (C<sub>14</sub>H<sub>10</sub>N<sub>3</sub><sup>195</sup>Pt) = 568.1101, found = 568.1109

# 5- <sup>1</sup>H and <sup>13</sup>C NMR Spectra

## A- L1-L8 ligands

### L1

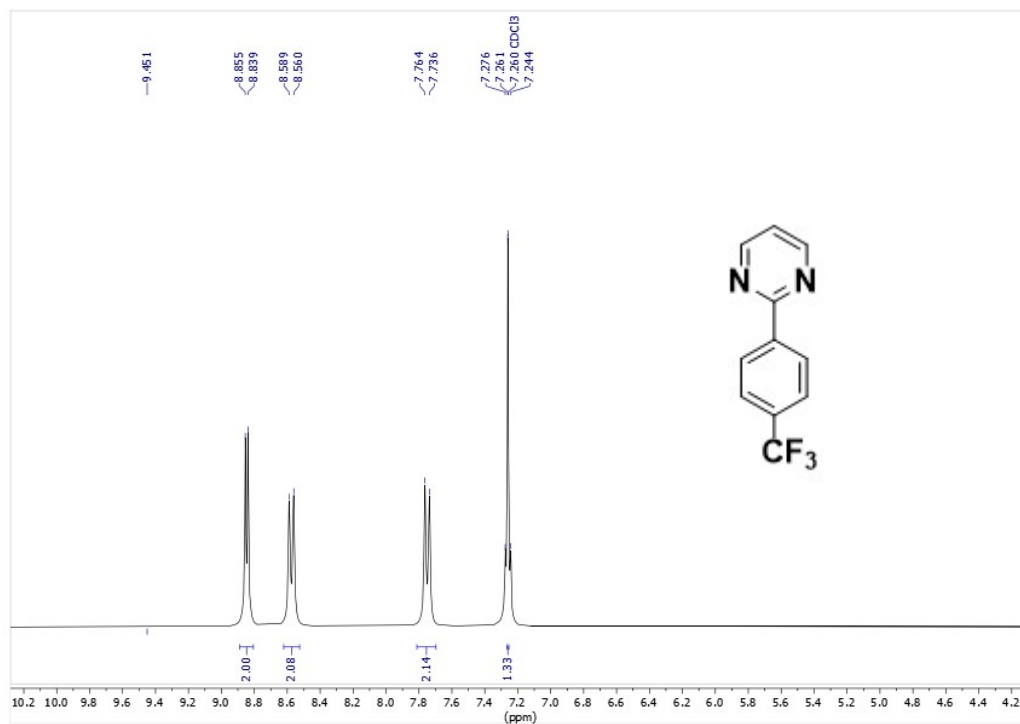

Figure S1 : <sup>1</sup>H NMR spectrum for ligand L1 in CDCl<sub>3</sub>

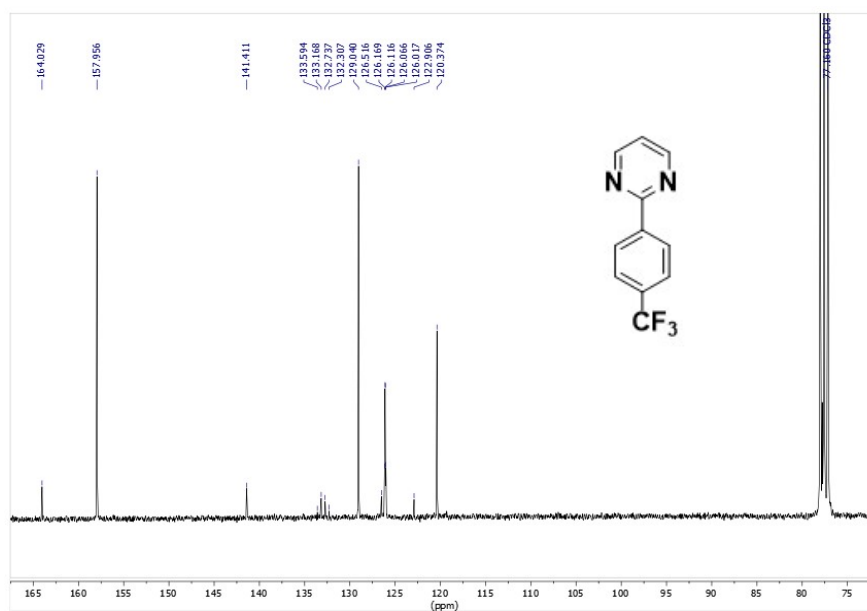

Figure S2 :  $^{13}\text{C}$  NMR spectrum for ligand L1 in  $\text{CDCl}_3$

L2

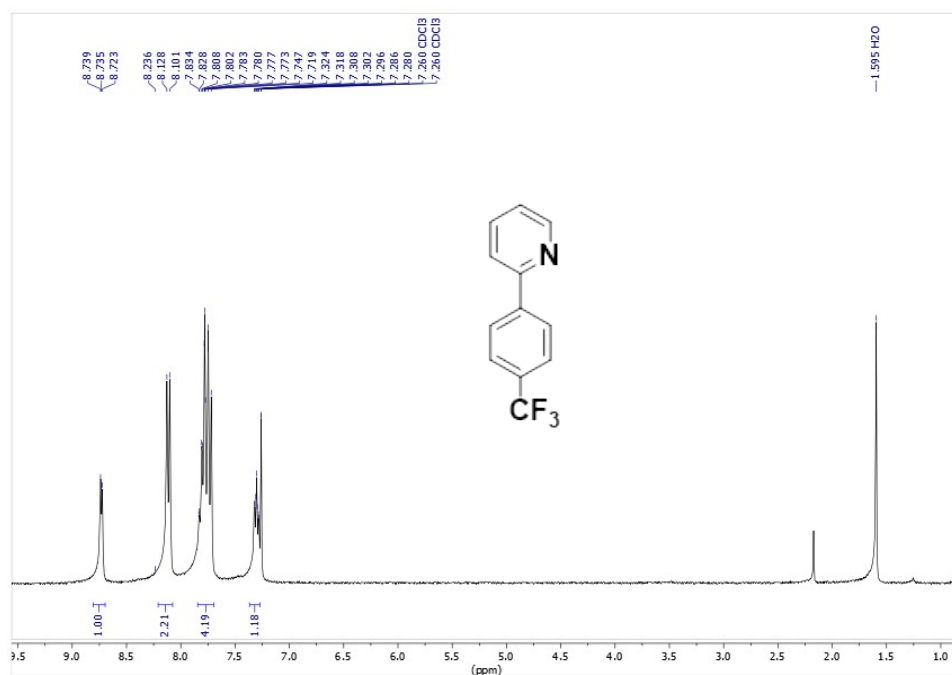

Figure S3 :  $^1\text{H}$  NMR spectrum for ligand L2 in  $\text{CDCl}_3$

L3

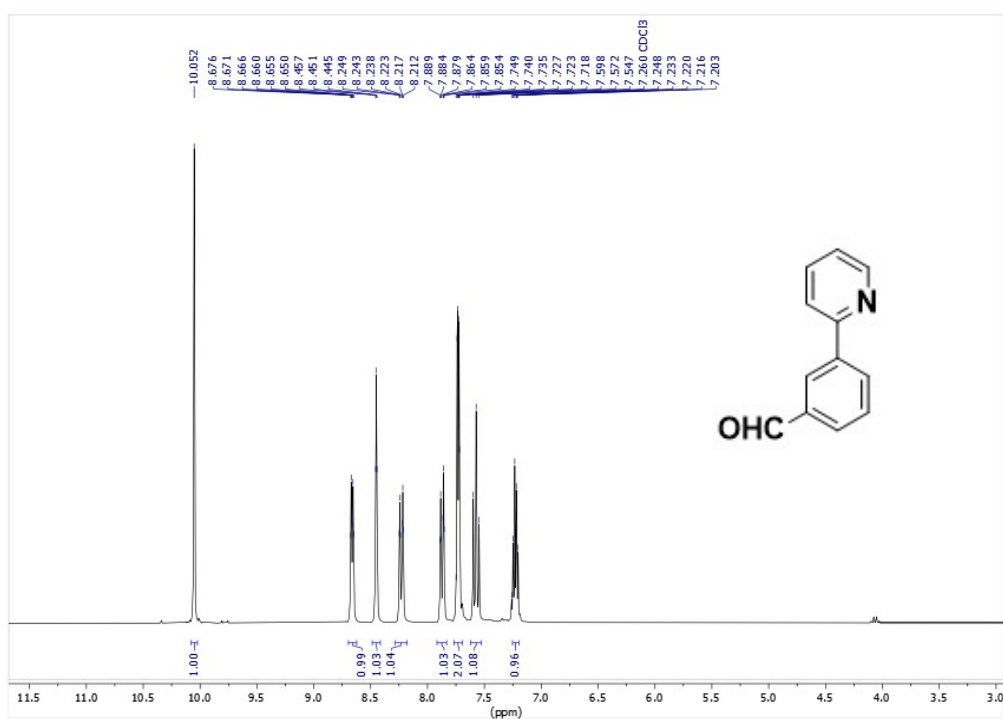

Figure S4 :  $^1\text{H}$  NMR spectrum for ligand L3 in  $\text{CDCl}_3$

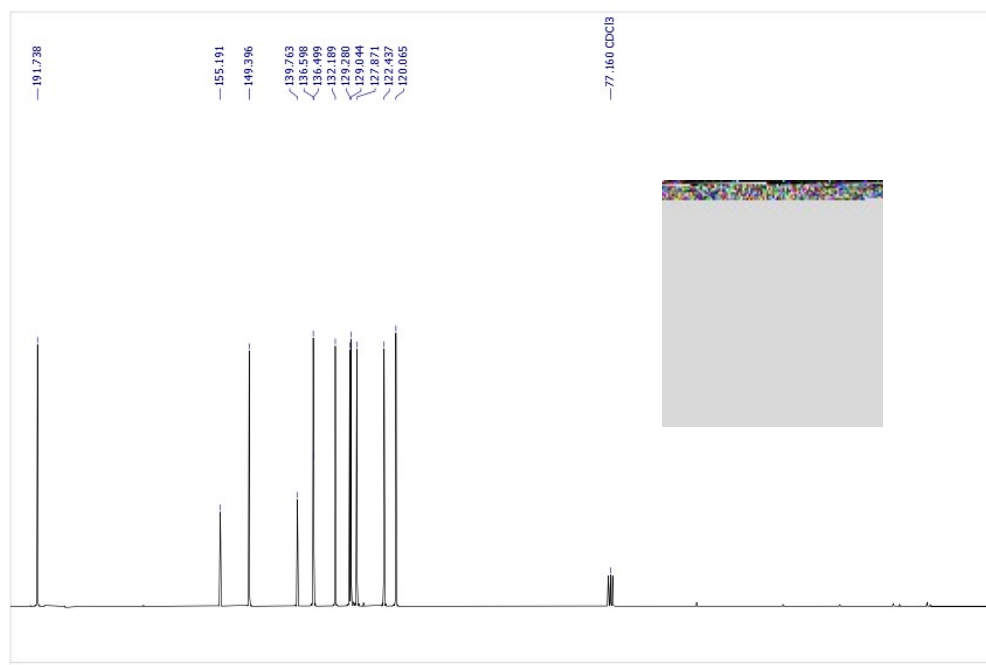

Figure S5 :  $^{13}\text{C}$  NMR spectrum for ligand **L3** in  $\text{CDCl}_3$

**L4**

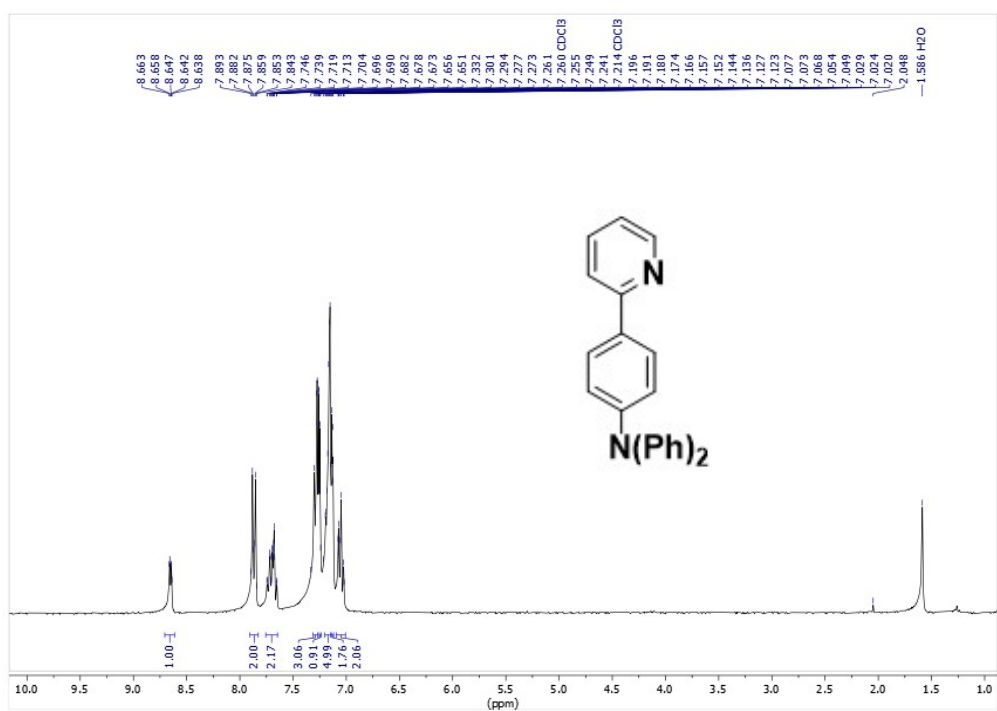

Figure S6 :  $^1\text{H}$  NMR spectrum for ligand L4 in  $\text{CDCl}_3$

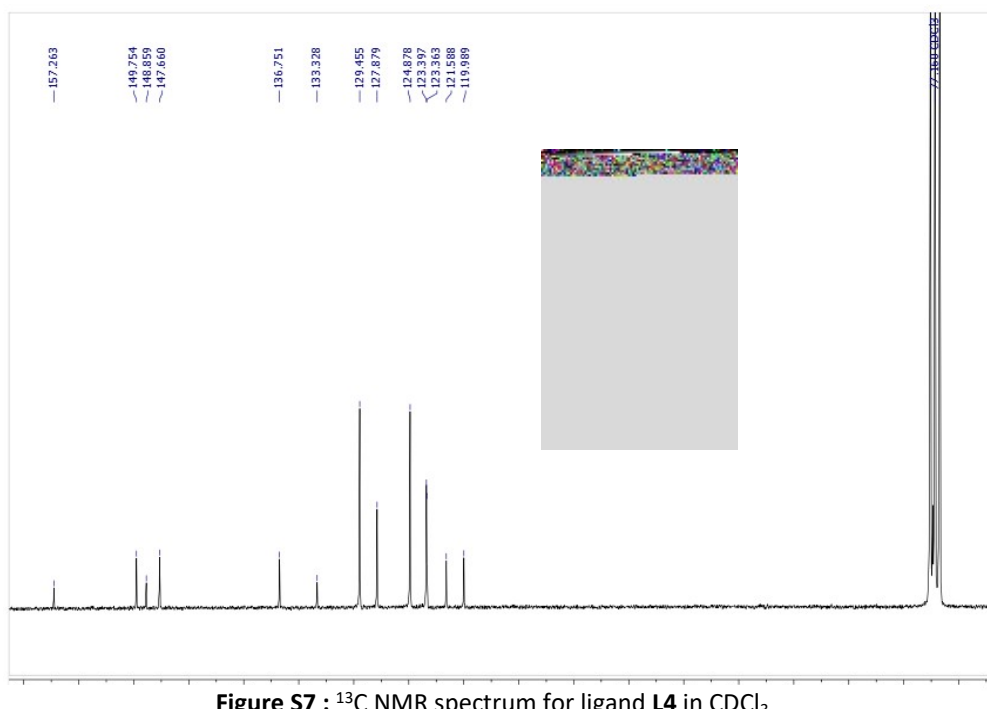

L5

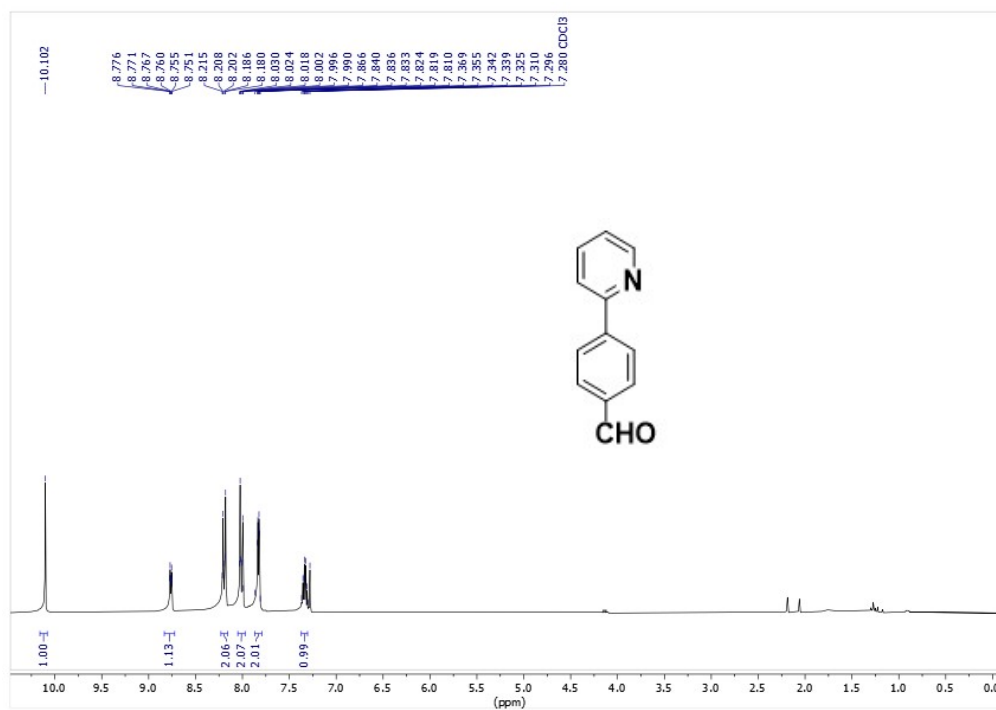

Figure S8 :  $^1\text{H}$  NMR spectrum for ligand L5 in  $\text{CDCl}_3$

L6

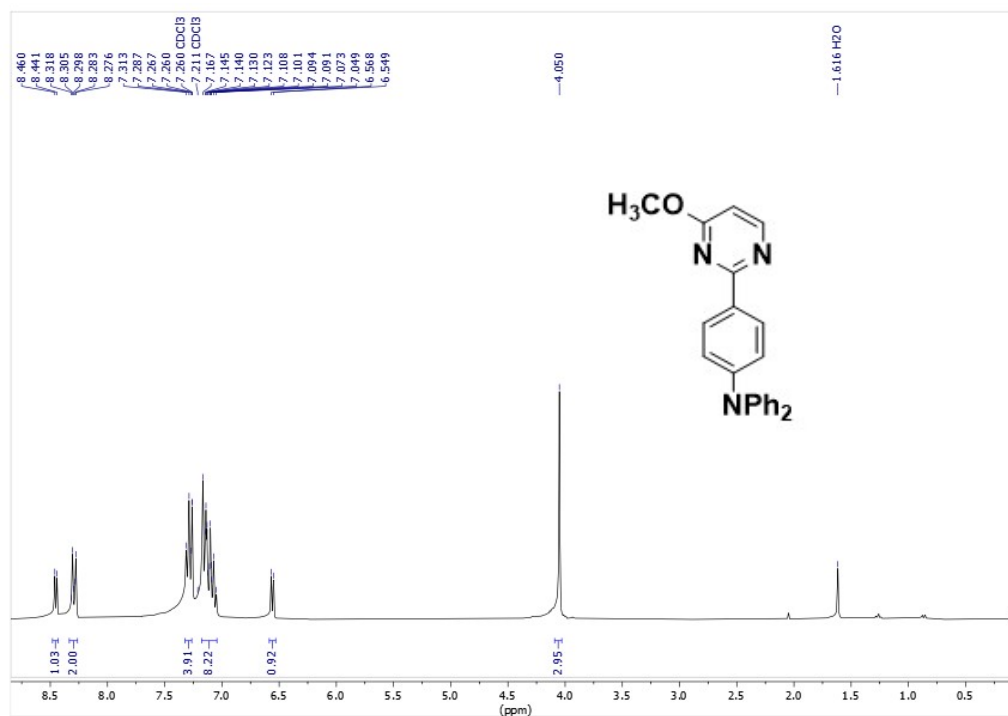

Figure S9 :  $^1\text{H}$  NMR spectrum for ligand L6 in  $\text{CDCl}_3$

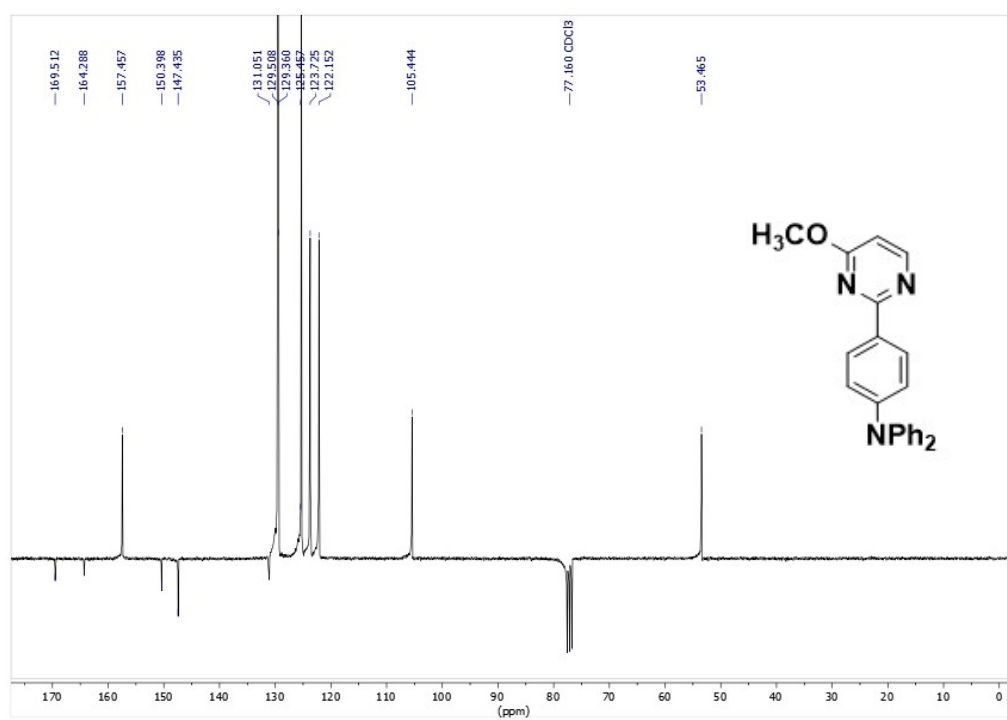



Figure S10 : J-mod  $^{13}\text{C}$  NMR spectrum for ligand L6 in  $\text{CDCl}_3$

L7

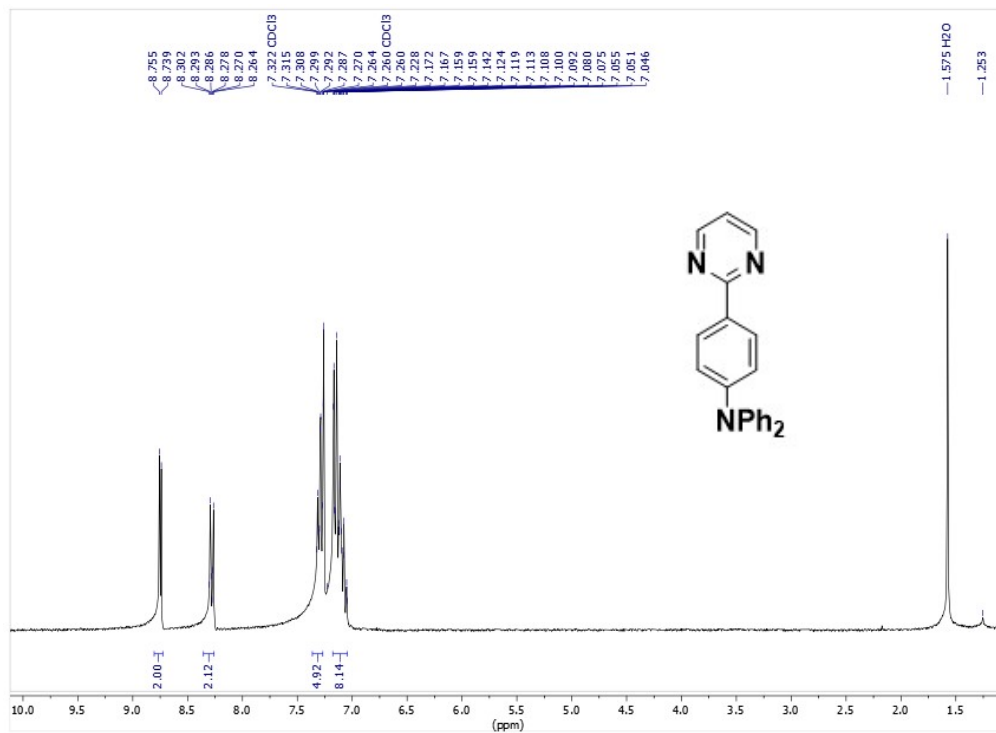

Figure S11 :  $^1\text{H}$  NMR spectrum for ligand L7 in  $\text{CDCl}_3$

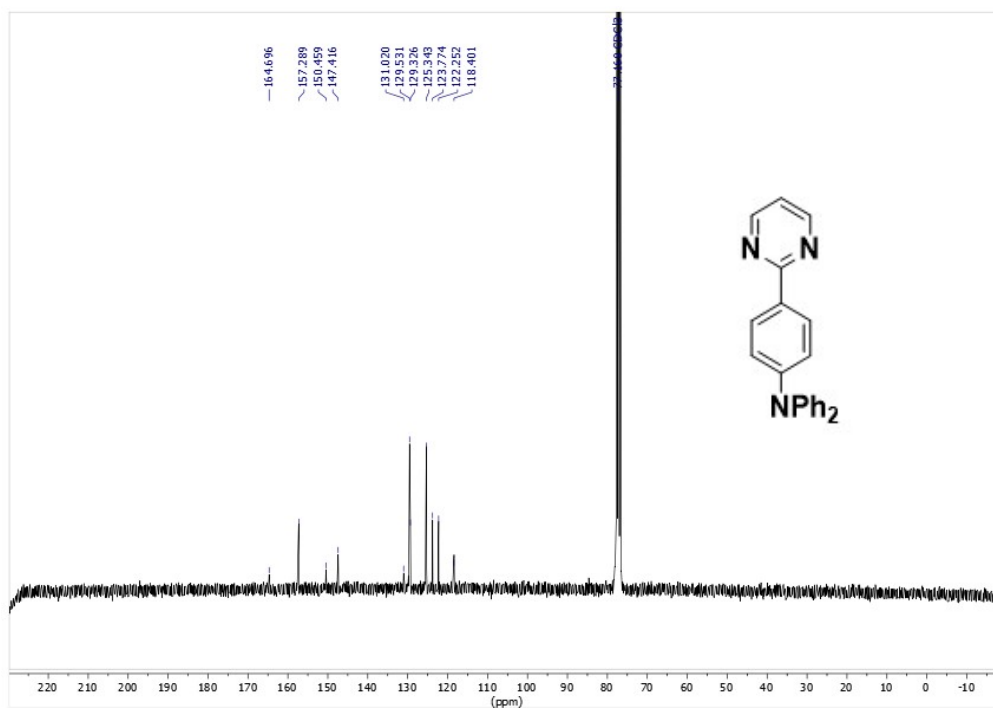

Figure S12 :  $^{13}\text{C}$  NMR spectrum for ligand L7 in  $\text{CDCl}_3$

L8

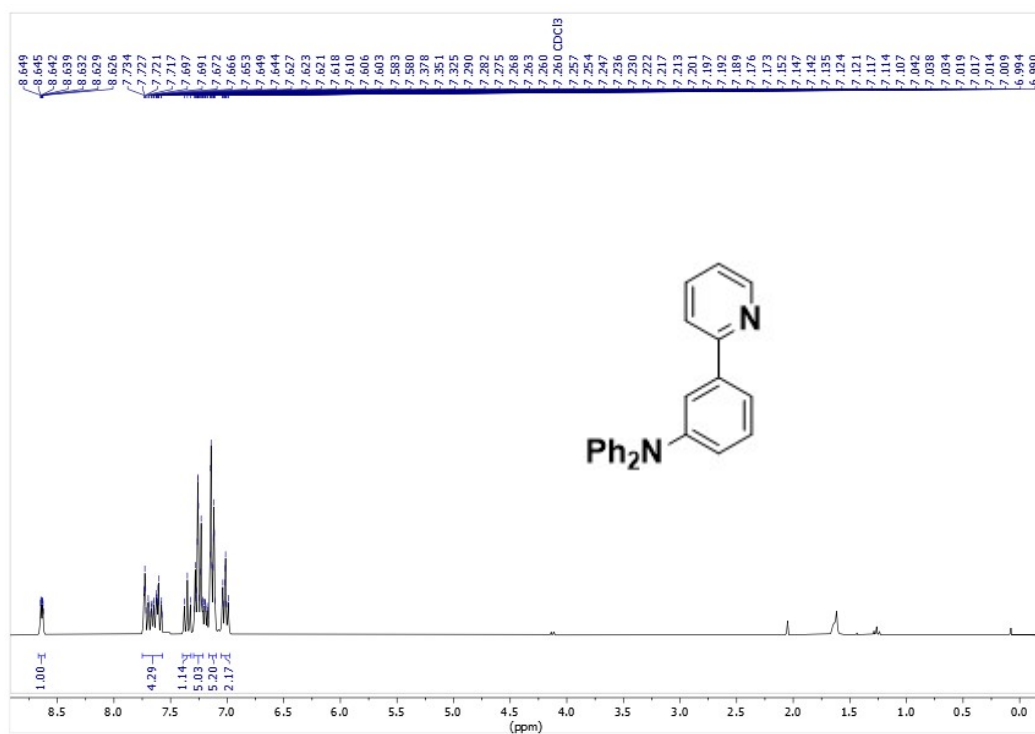

Figure S13 :  $^1\text{H}$  NMR spectrum for ligand L8 in  $\text{CDCl}_3$

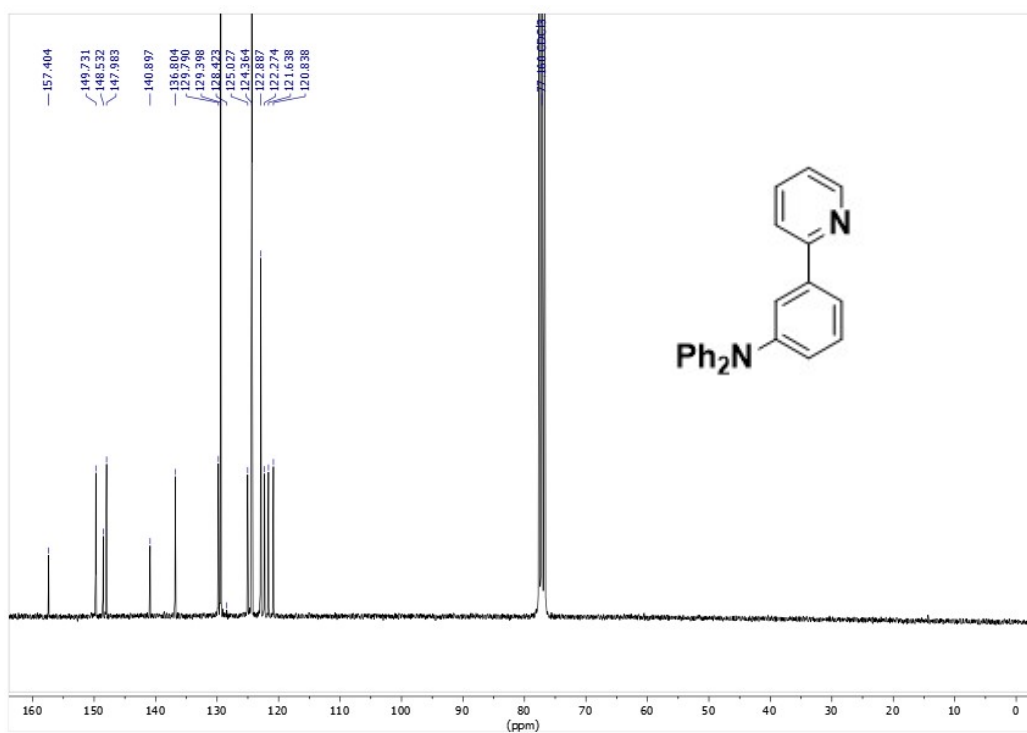

Figure S14 :  $^{13}\text{C}$  NMR spectrum for ligand L8 in  $\text{CDCl}_3$

## B- C1-C2 cationic precursors

C1

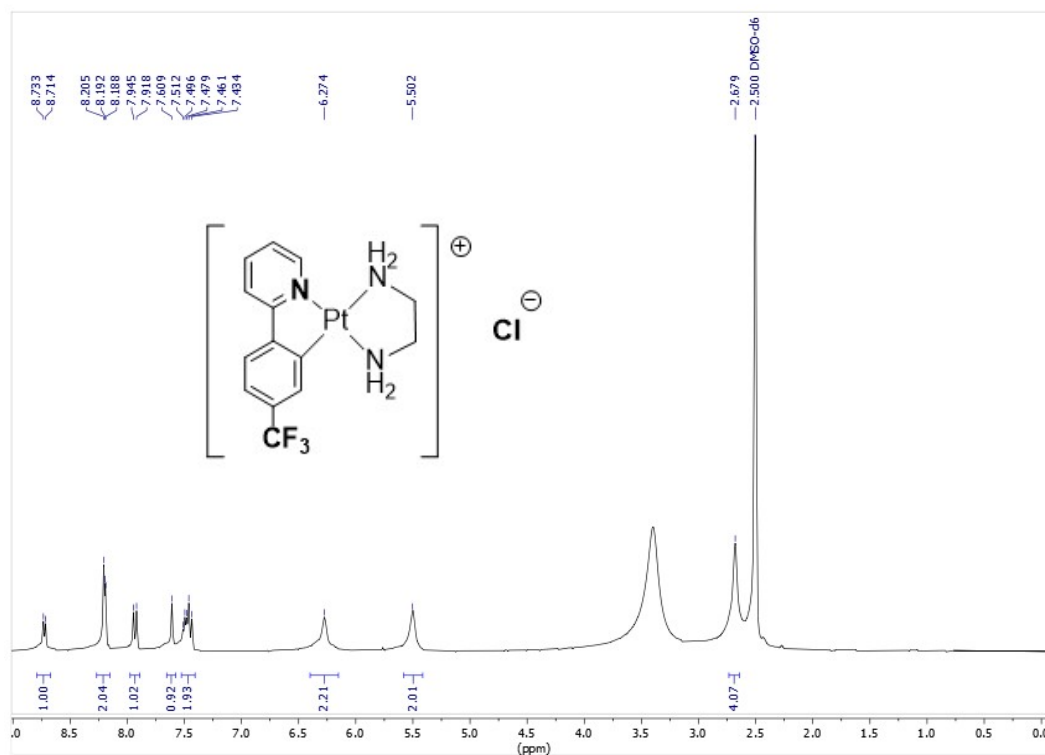

Figure S15 :  $^1\text{H}$  NMR spectrum for cationic platinum complex **C1** in DMSO-d6

C2

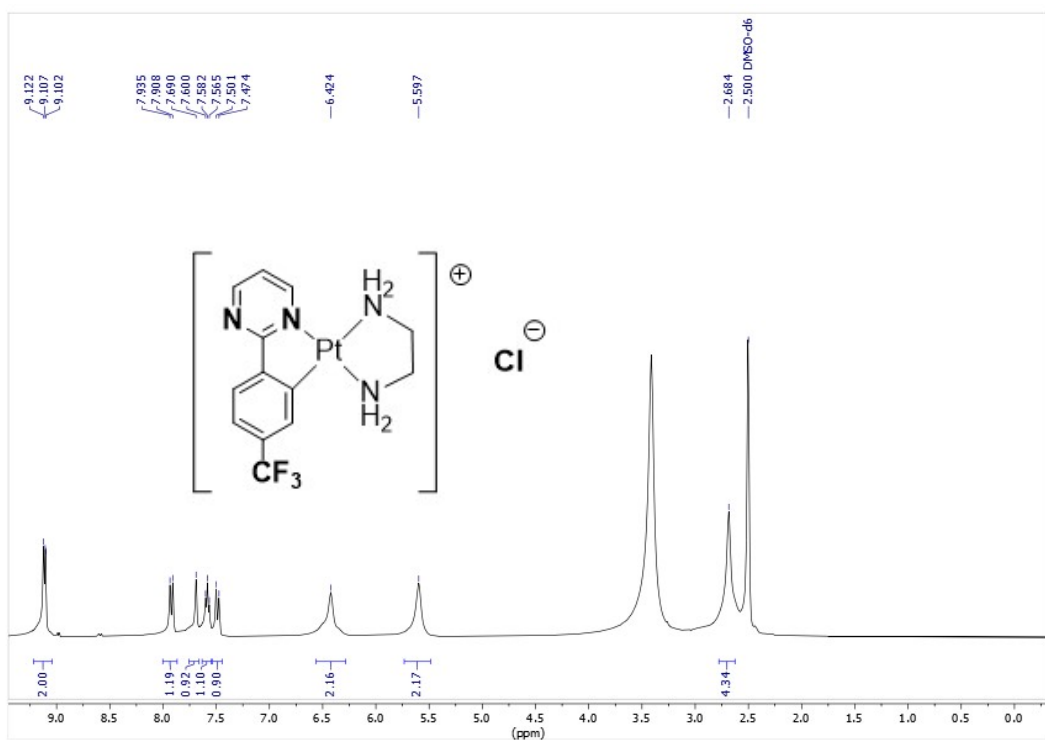

Figure S16 :  $^1\text{H}$  NMR spectrum for cationic platinum complex **C2** in DMSO-d6

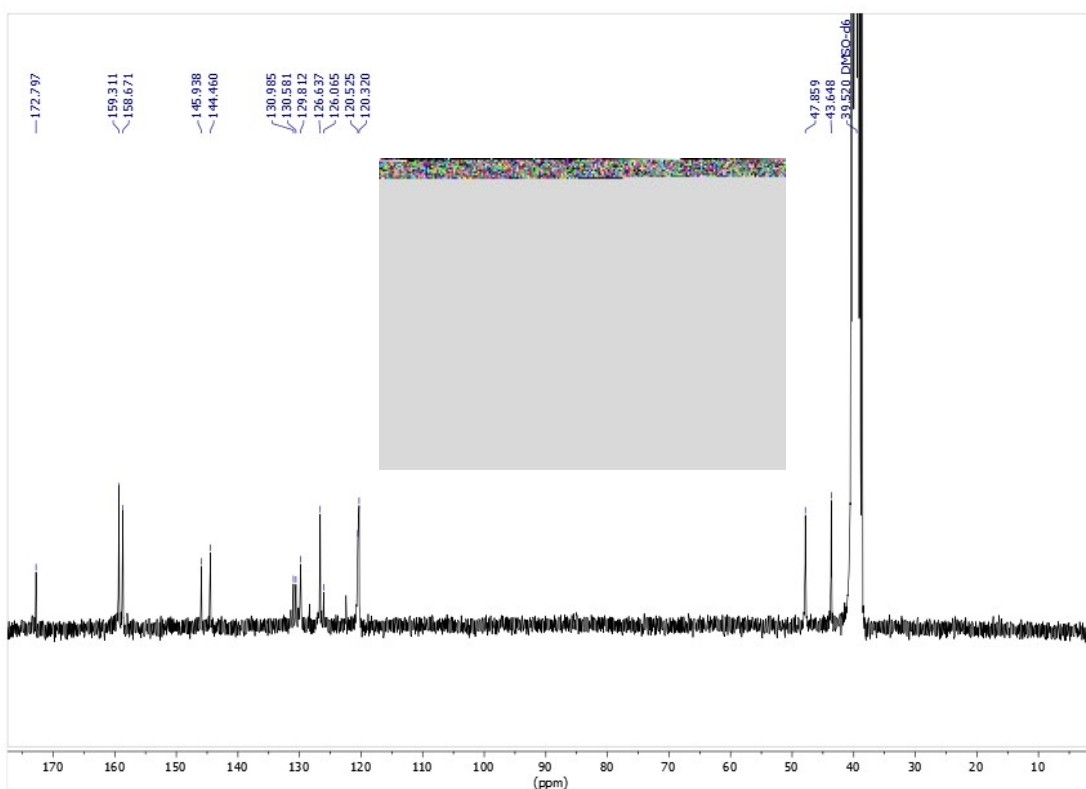

Figure S17 :  $^{13}\text{C}$  NMR spectrum for cationic platinum complex **C2** in DMSO-d6

## C- A1-A7 anionic precursors

### A1

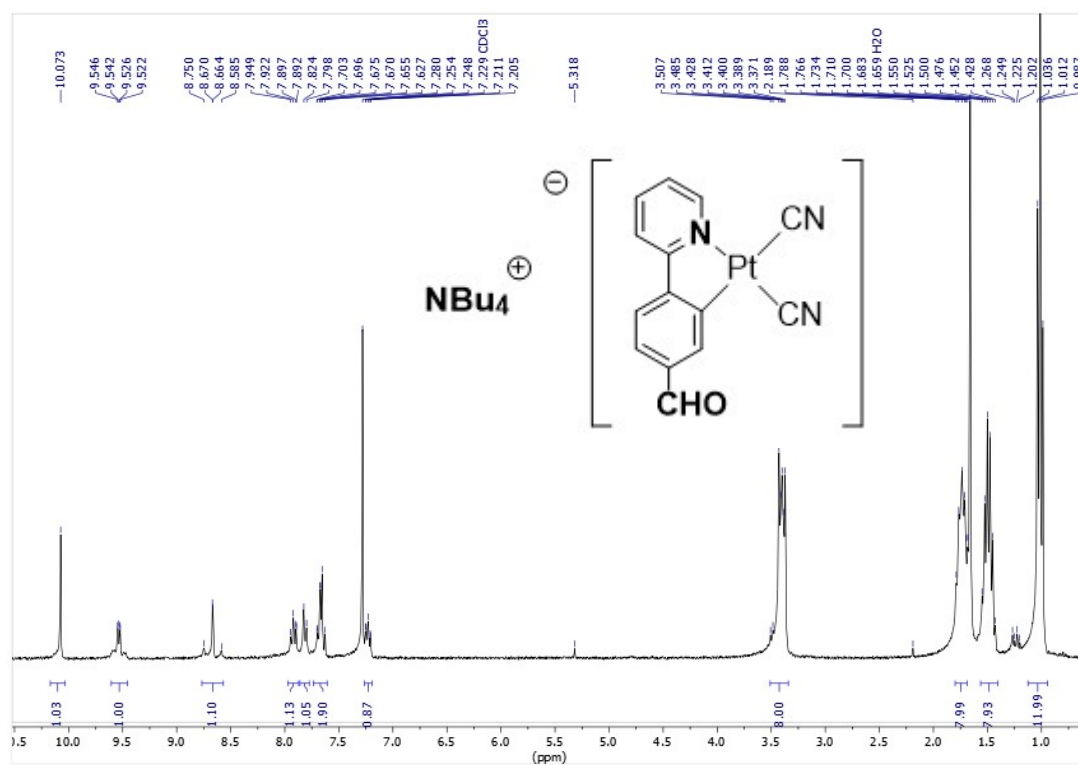

Figure S18 :  $^1\text{H}$  NMR spectrum for anionic platinum complex **A1** in  $\text{CDCl}_3$

A2

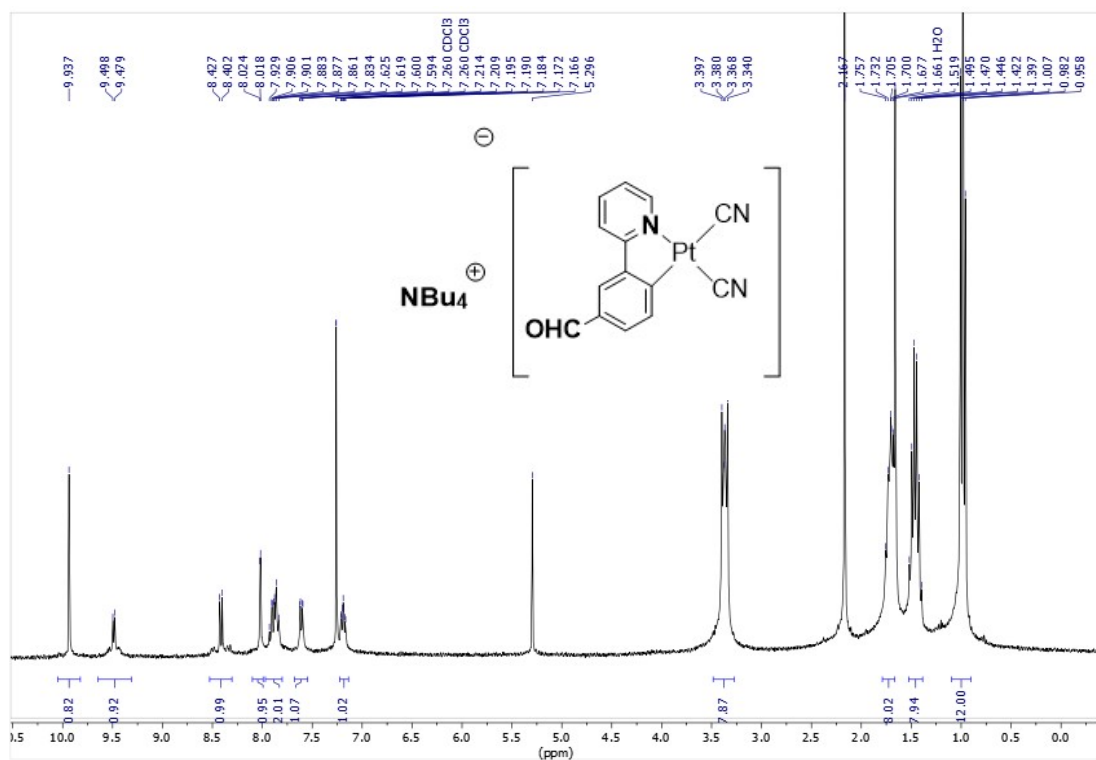

**Figure S19** :  $^1\text{H}$  NMR spectrum for anionic platinum complex **A2** in  $\text{CDCl}_3$

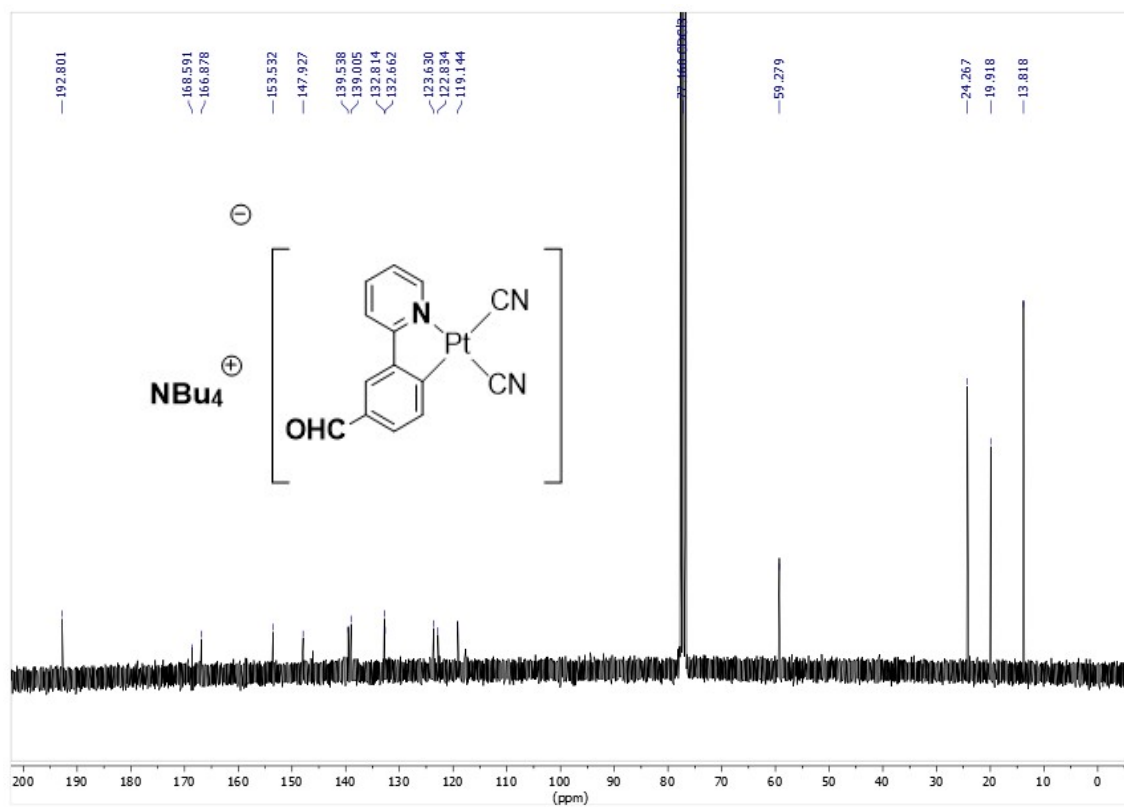

**Figure S20** :  $^{13}\text{C}$  NMR spectrum for anionic platinum complex **A2** in  $\text{CDCl}_3$

A3

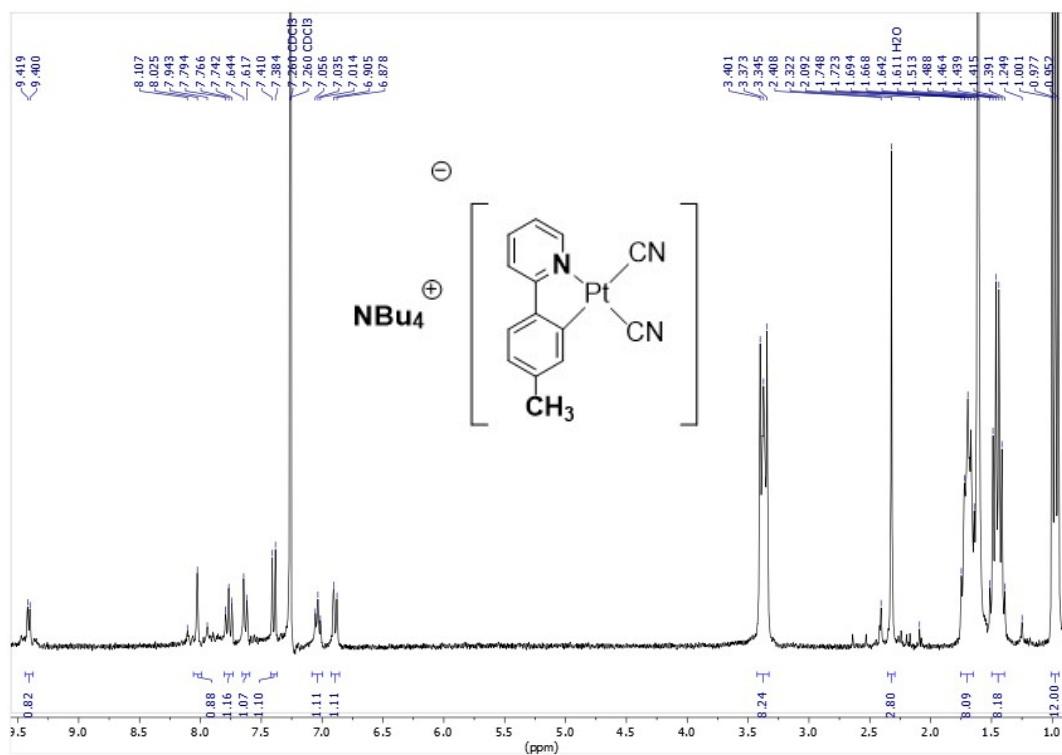

**Figure S21** :  $^1\text{H}$  NMR spectrum for anionic platinum complex **A3** in  $\text{CDCl}_3$

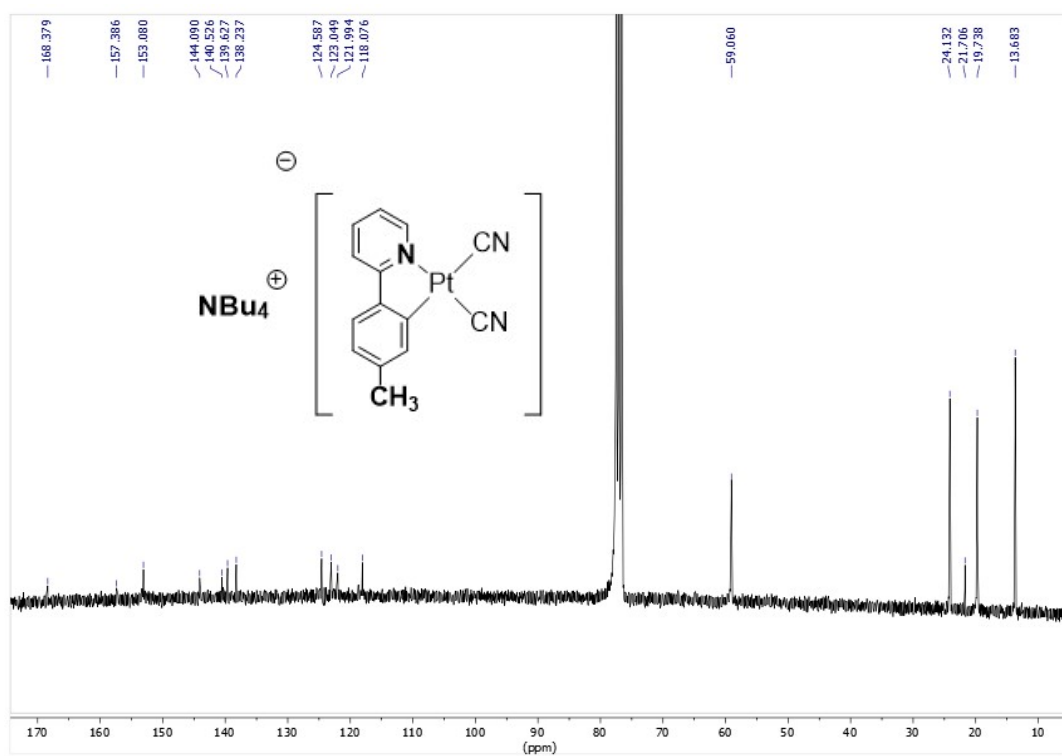

**Figure S22** :  $^{13}\text{C}$  NMR spectrum for anionic platinum complex **A3** in  $\text{CDCl}_3$

A4

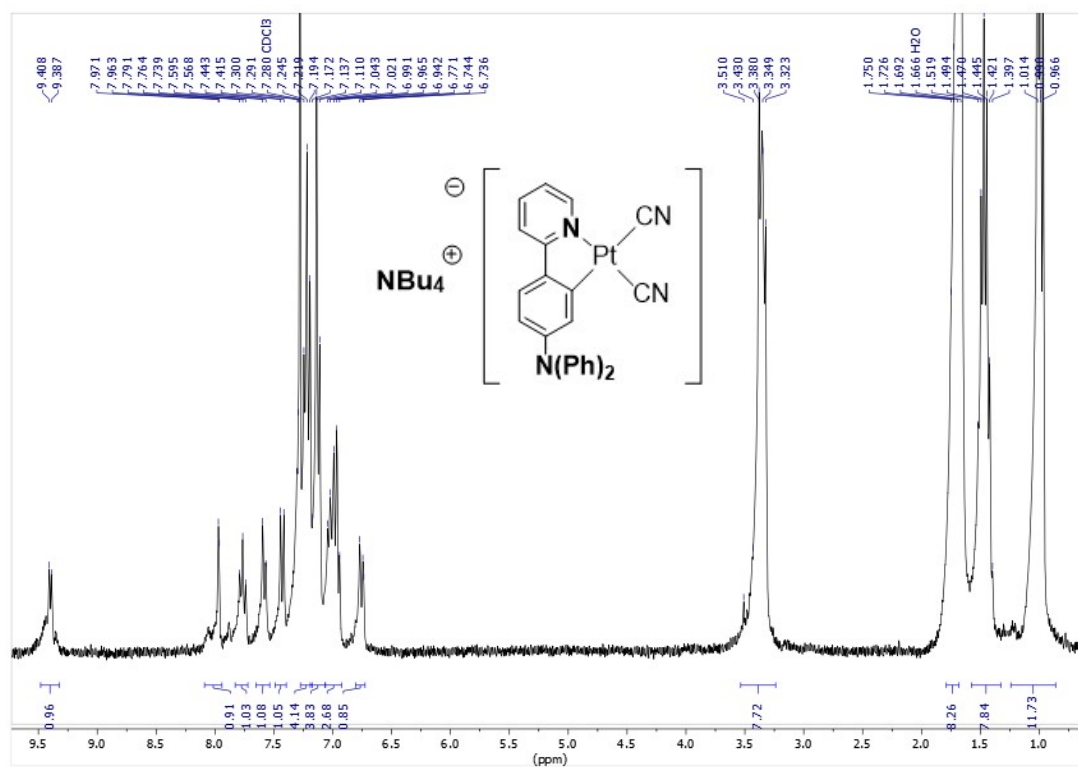

**Figure S23** :  $^1\text{H}$  NMR spectrum for anionic platinum complex **A4** in  $\text{CDCl}_3$

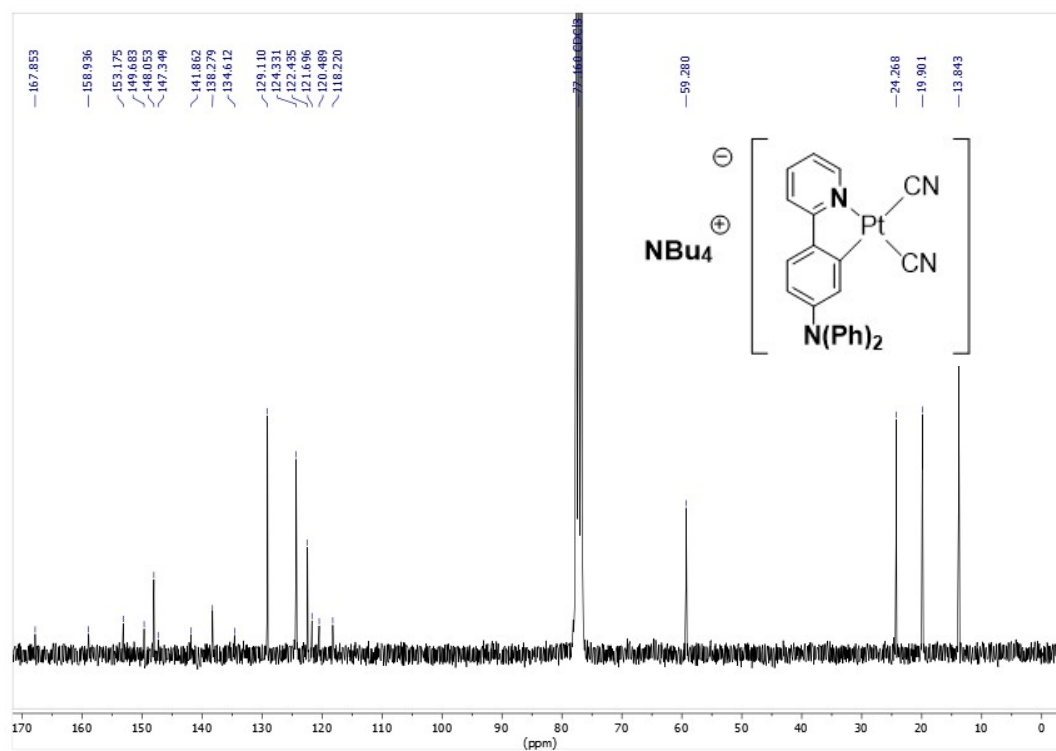

**Figure S24** :  $^{13}\text{C}$  NMR spectrum for anionic platinum complex **A4** in  $\text{CDCl}_3$

A5

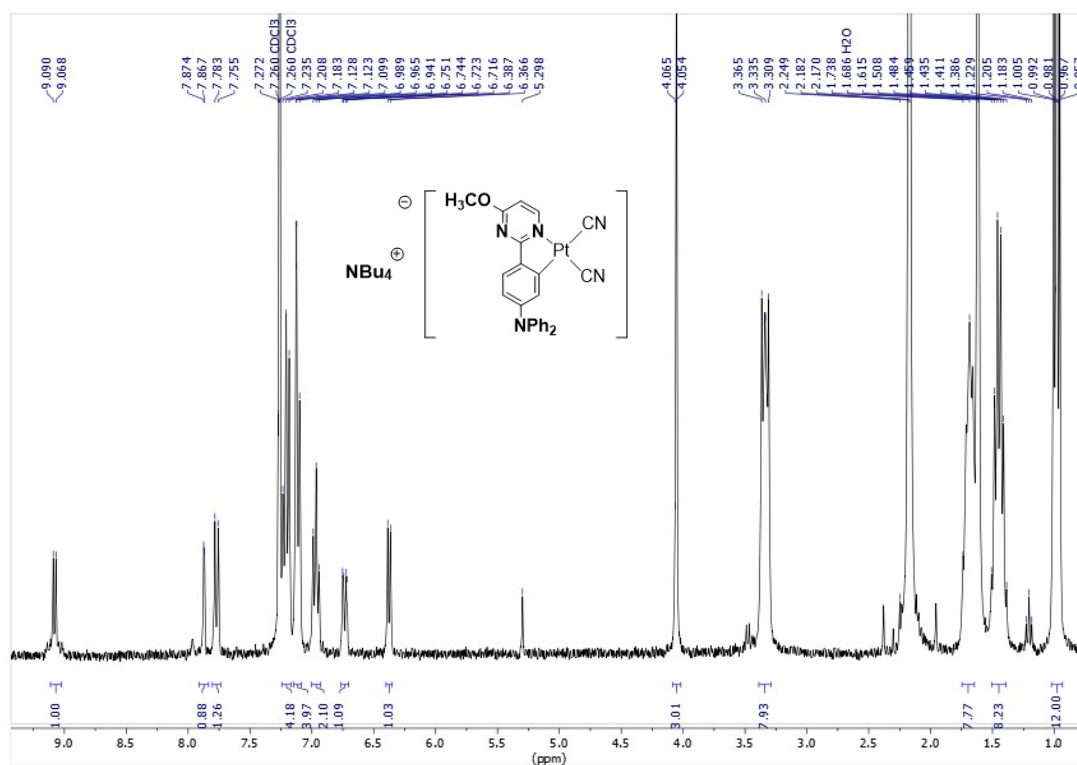

Figure S25 :  $^1\text{H}$  NMR spectrum for anionic platinum complex A5 in  $\text{CDCl}_3$

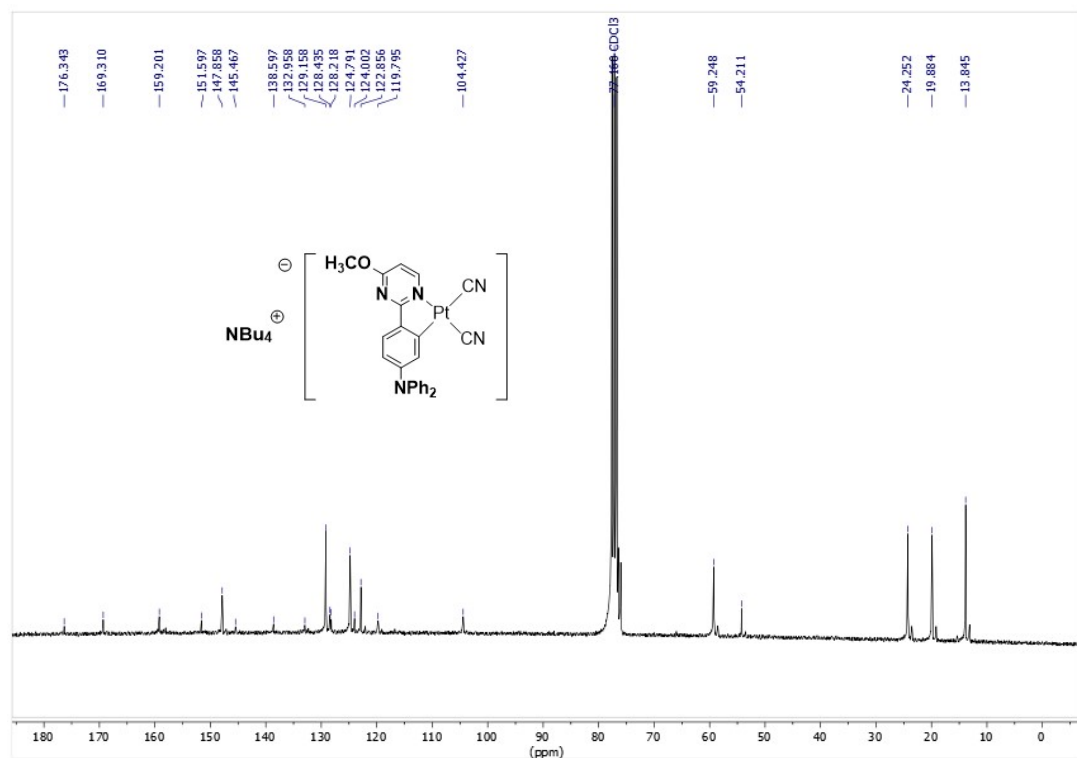

Figure S26 :  $^{13}\text{C}$  NMR spectrum for anionic platinum complex A5 in  $\text{CDCl}_3$



A6

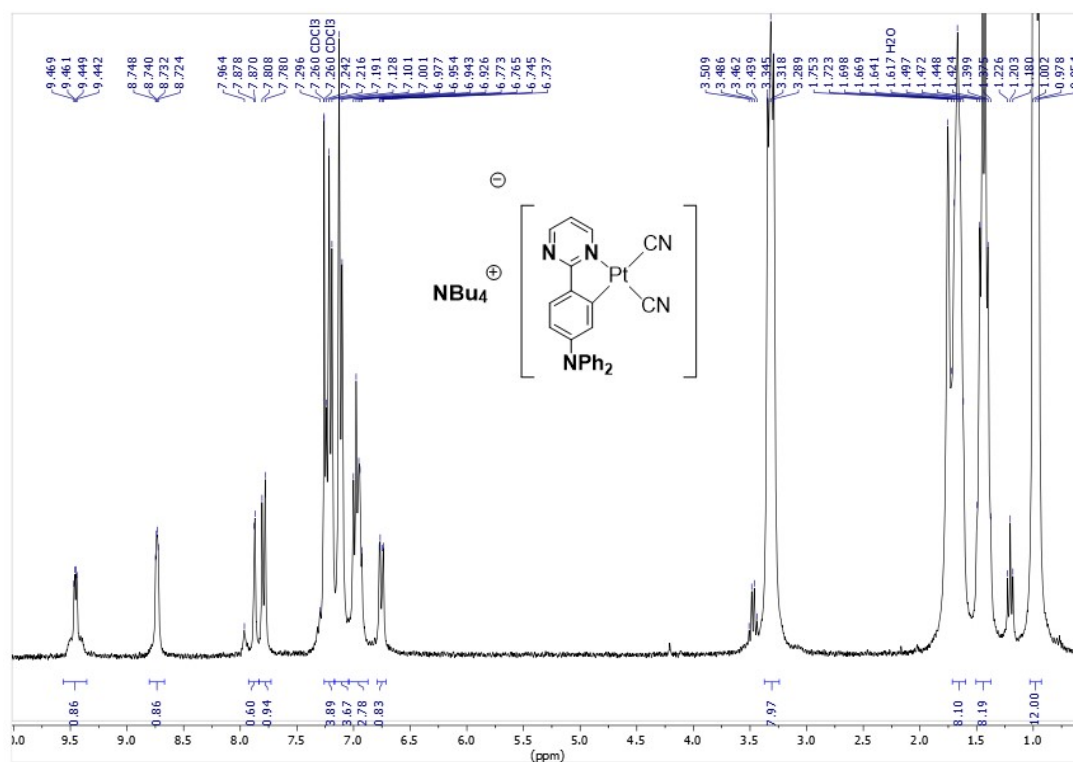

**Figure S27** :  $^1\text{H}$  NMR spectrum for anionic platinum complex **A6** in  $\text{CDCl}_3$

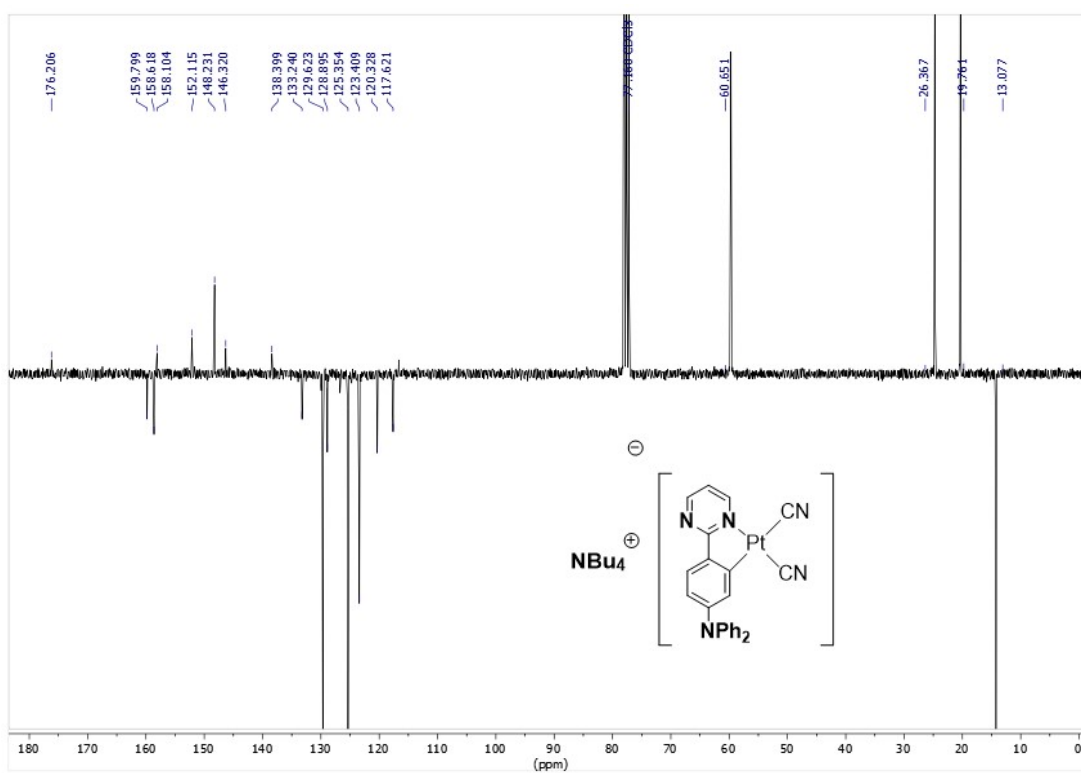

**Figure S28** : J-mod  $^{13}\text{C}$  NMR spectrum for anionic platinum complex **A6** in  $\text{CDCl}_3$

A7

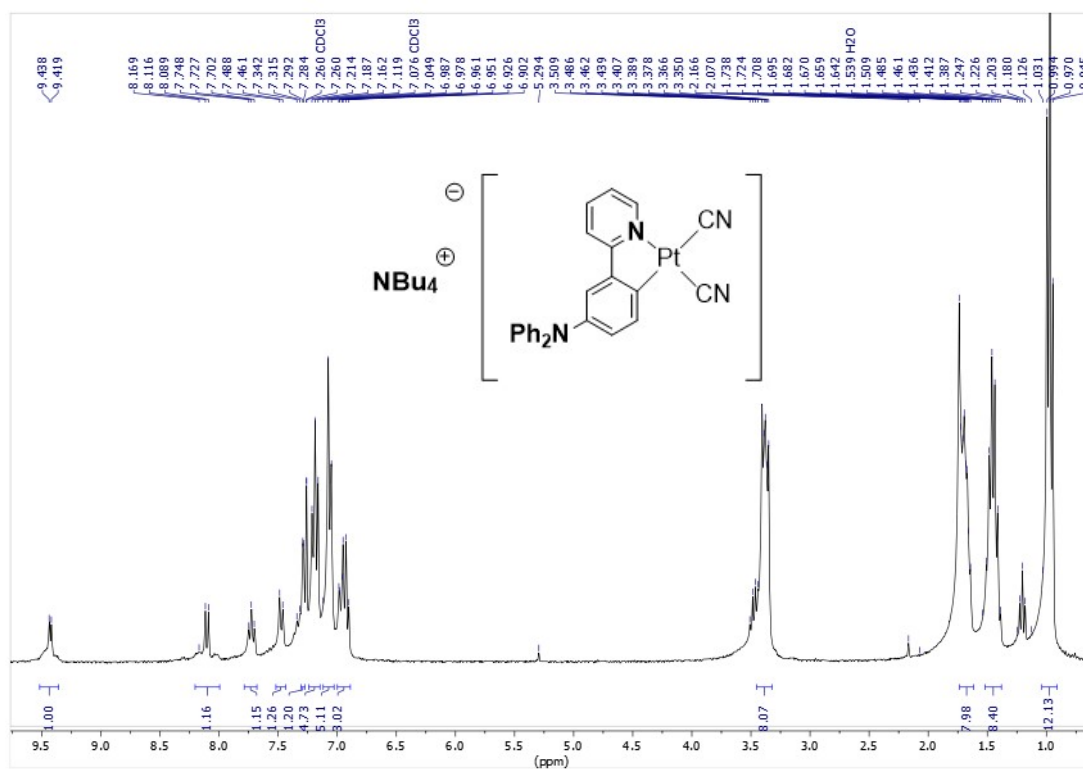

Figure S29 :  $^1\text{H}$  NMR spectrum for anionic platinum complex A7 in  $\text{CDCl}_3$

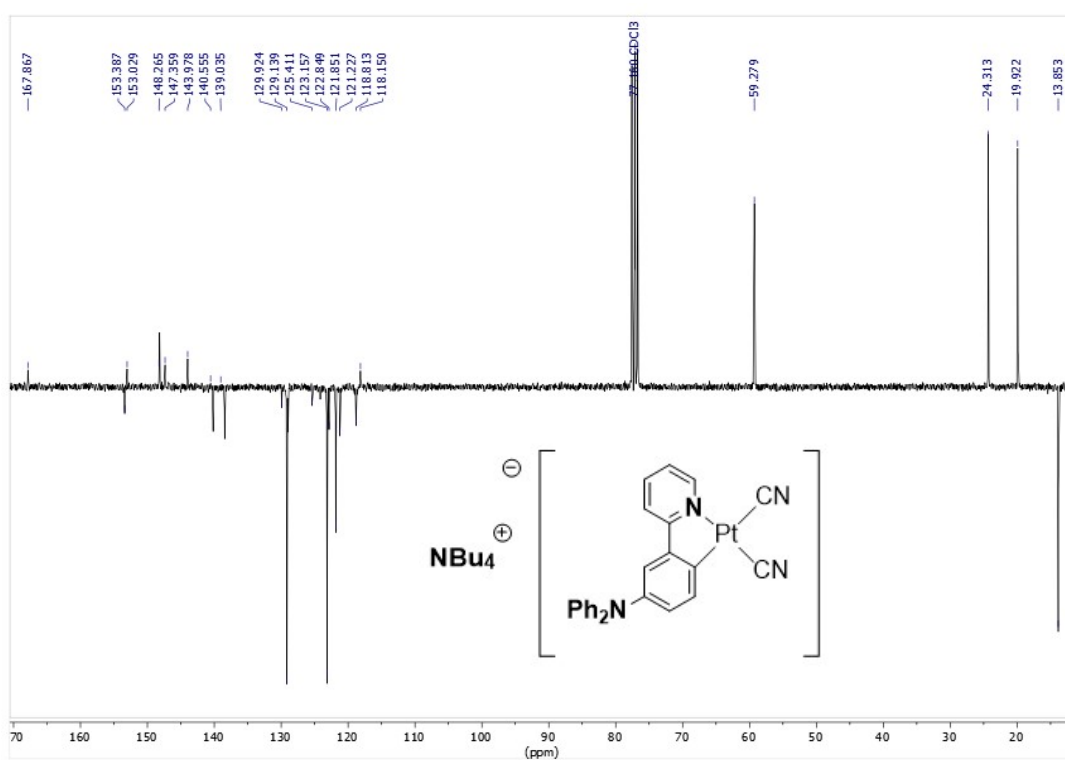

Figure S30 : J-mod  $^{13}\text{C}$  NMR spectrum for anionic platinum complex A7 in  $\text{CDCl}_3$

## D- S0-S9 soft salts

S0

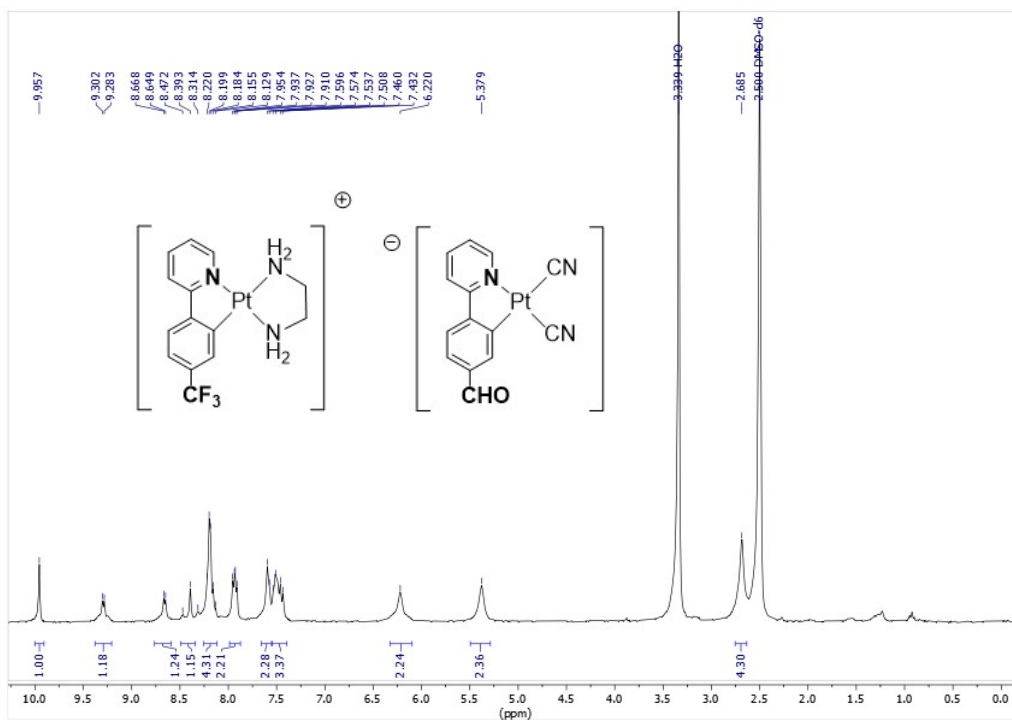

Figure S31 :  $^1\text{H}$  NMR spectrum soft salt S0 in DMSO-d6

S1

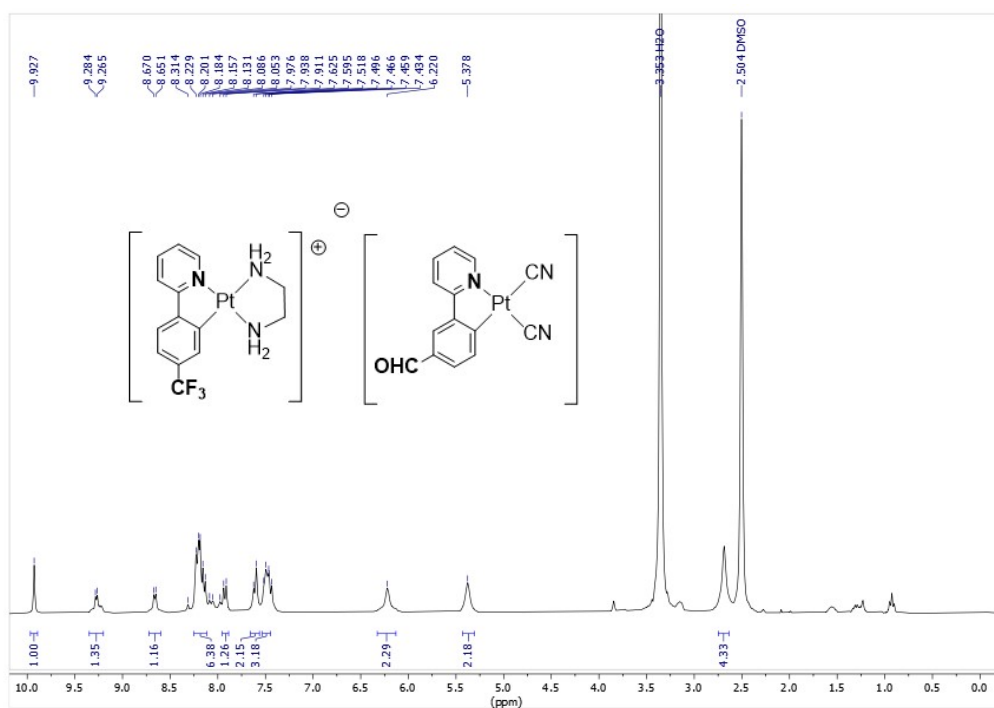

Figure S32 :  $^1\text{H}$  NMR spectrum soft salt S1 in DMSO-d6

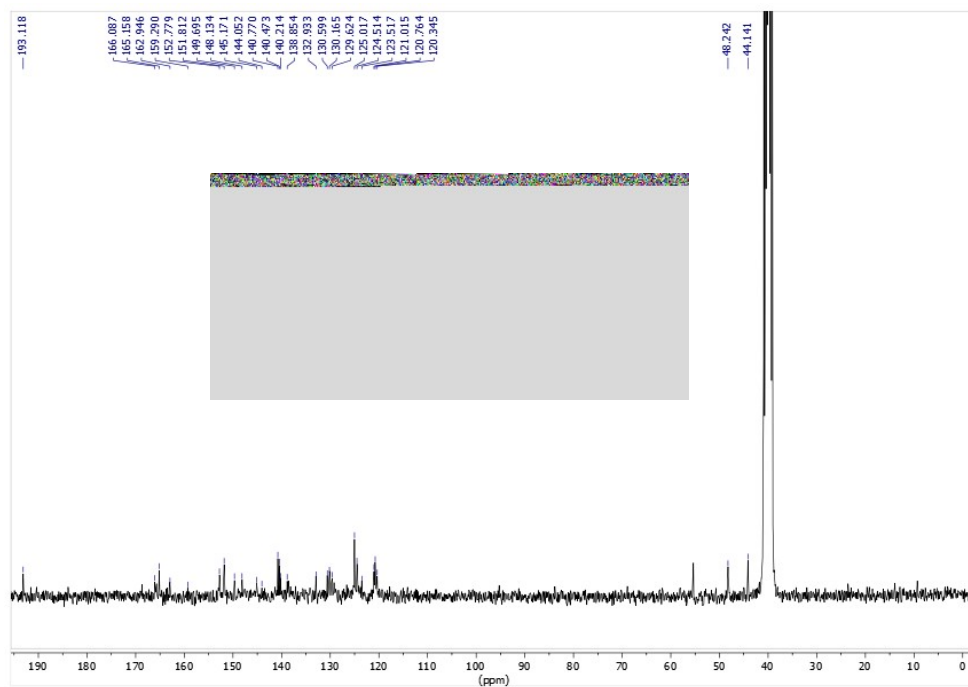

Figure S33 :  $^{13}\text{C}$  NMR spectrum for soft salt S1 in DMSO-d6

S2

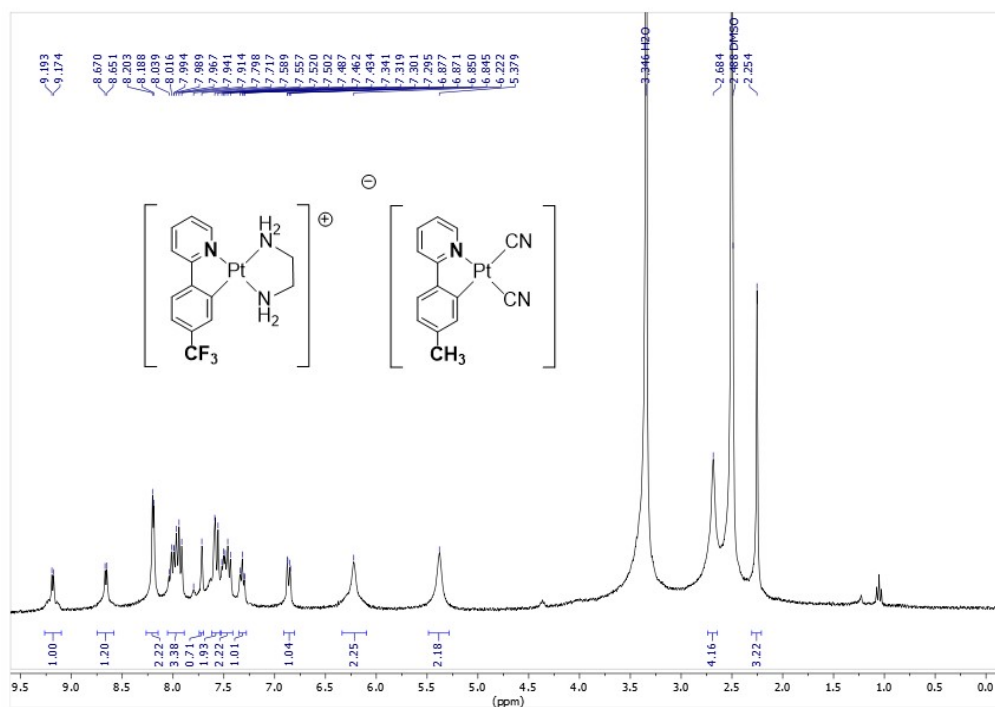

Figure S34 :  $^1\text{H}$  NMR spectrum soft salt S2 in DMSO-d6

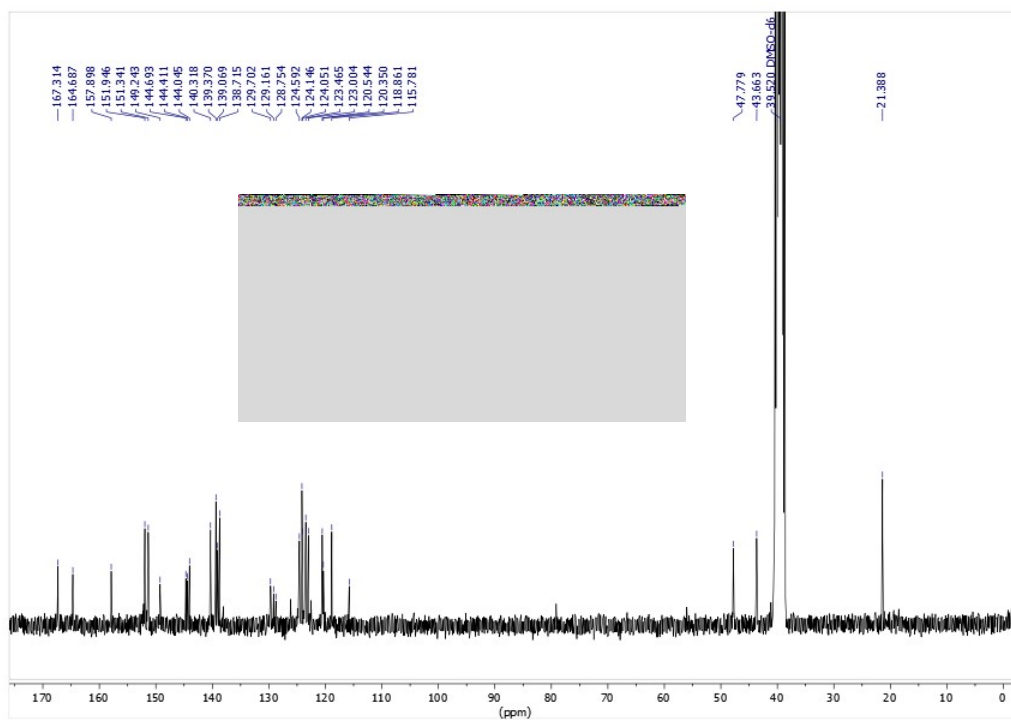

Figure S35 :  $^{13}\text{C}$  NMR spectrum for soft salt **S2** in DMSO-d<sub>6</sub>

S3

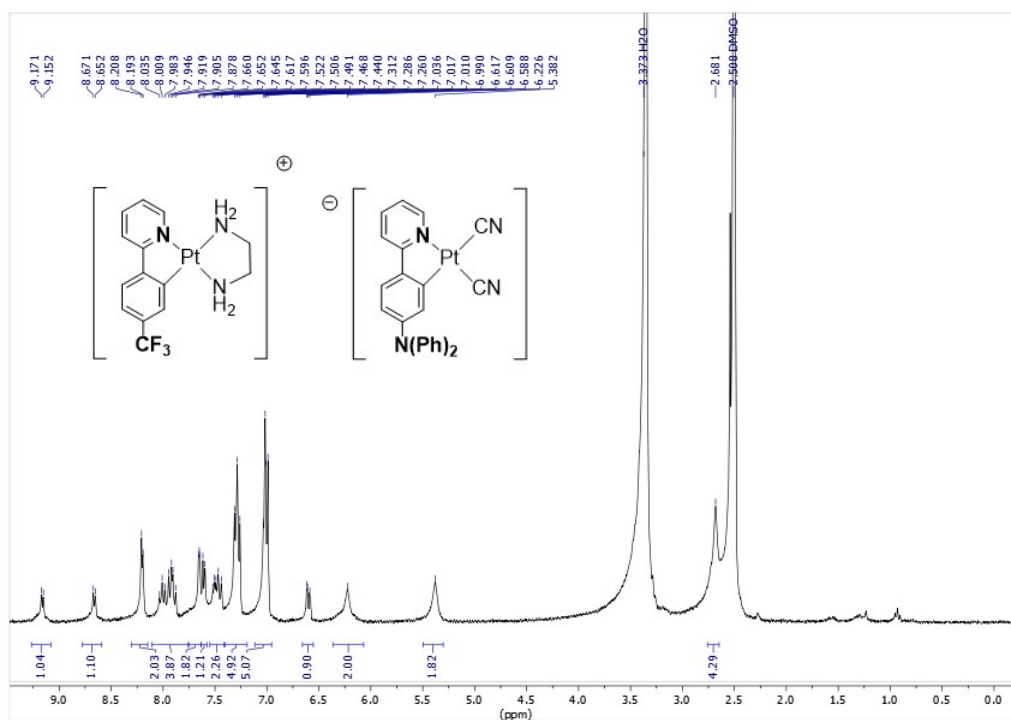

Figure S36 :  $^1\text{H}$  NMR spectrum for soft salt **S3** in DMSO-d<sub>6</sub>

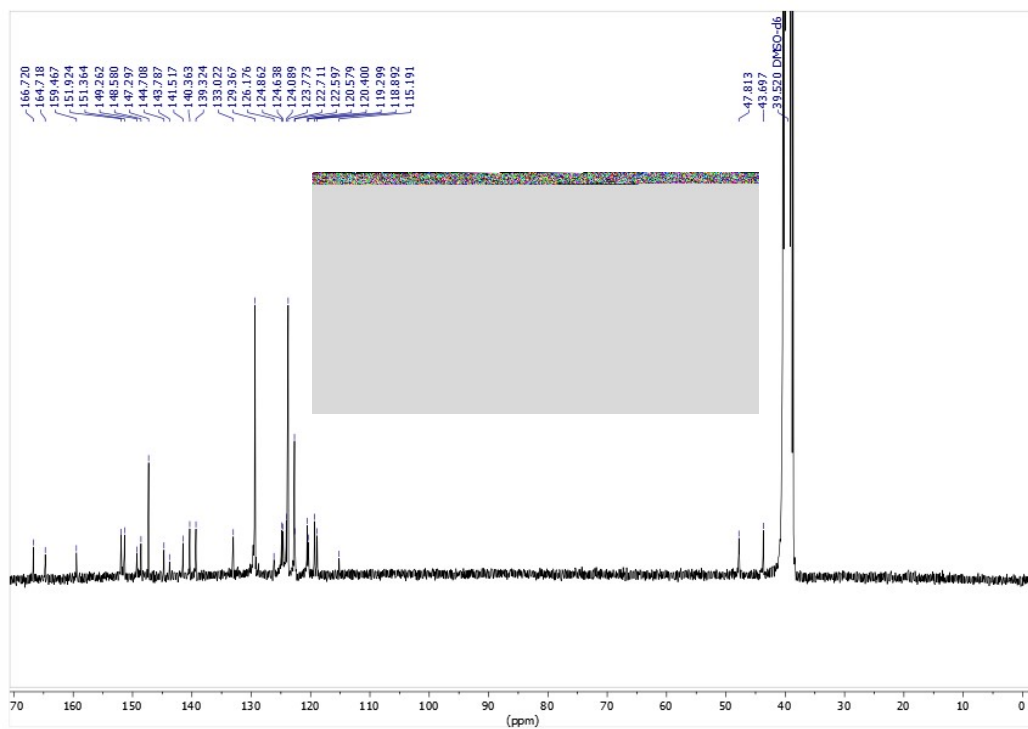

Figure S37 :  $^{13}\text{C}$  NMR spectrum for soft salt **S3** in DMSO-d6

S4

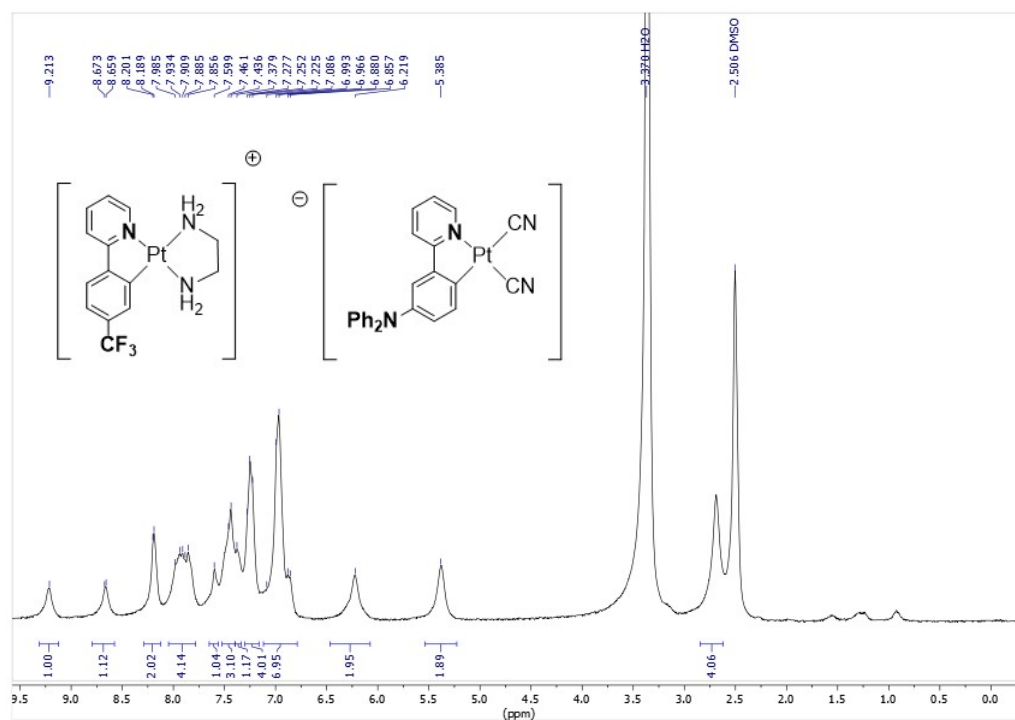

Figure S38 :  $^1\text{H}$  NMR spectrum for soft salt **S4** in DMSO-d6

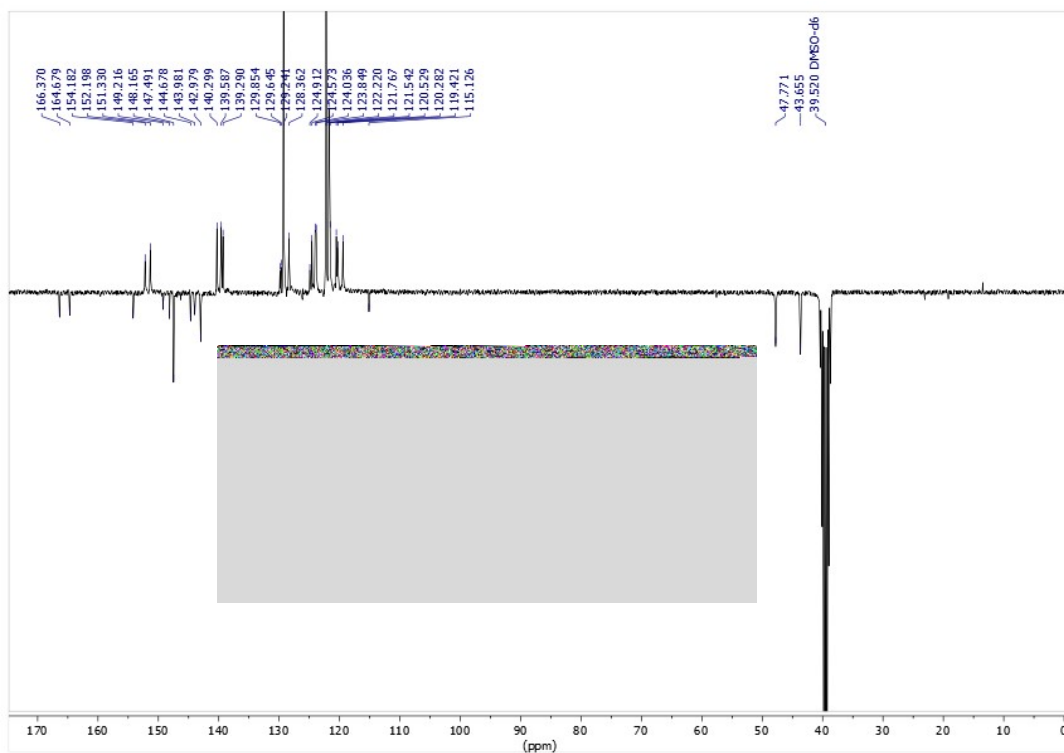

Figure S39 : J-mod  $^{13}\text{C}$  NMR spectrum for soft salt **S4** in DMSO-d6

S5

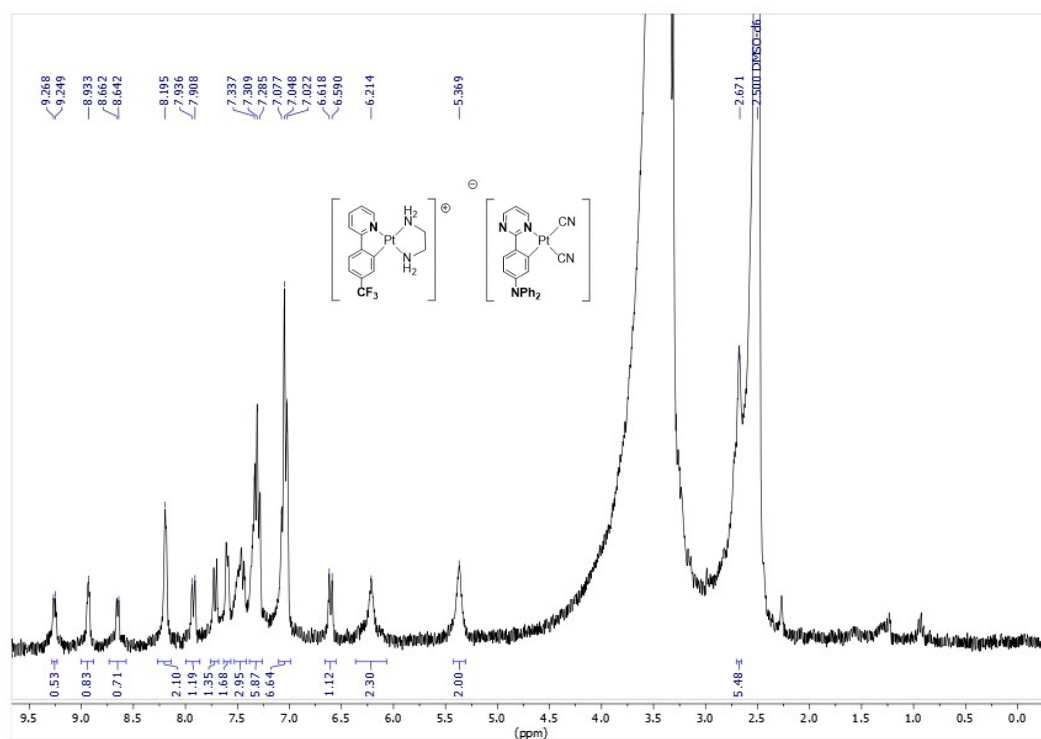

Figure S40 :  $^1\text{H}$  NMR spectrum for soft salt **S5** in DMSO-d6

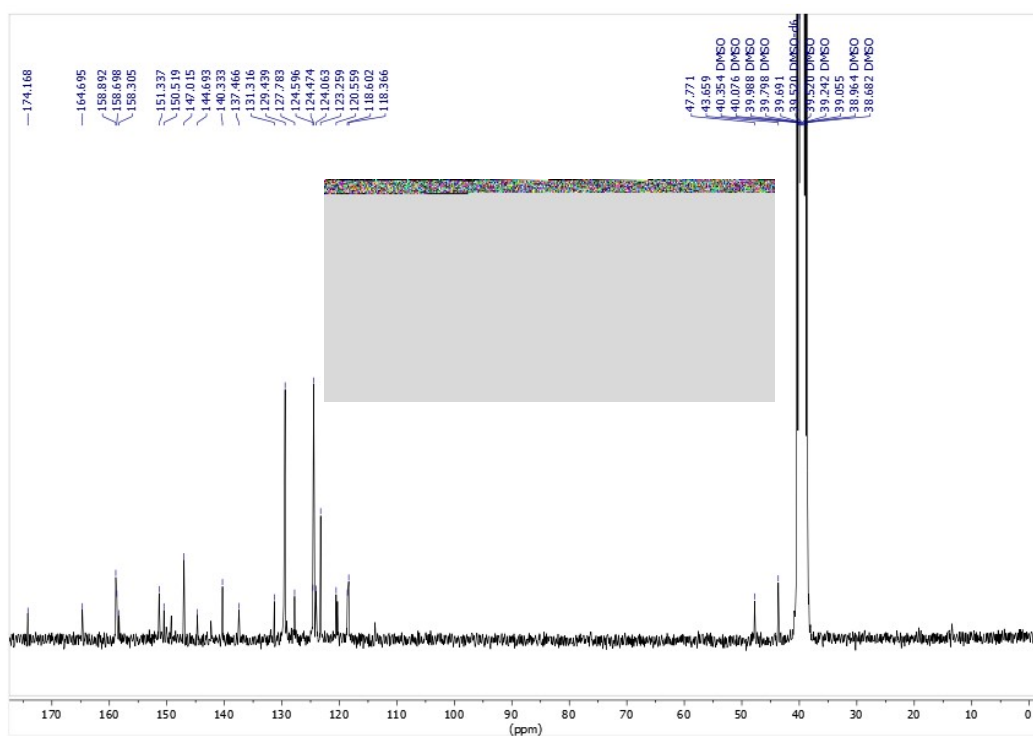

Figure S41 :  $^{13}\text{C}$  NMR spectrum for soft salt **S5** in DMSO-d<sub>6</sub>

**S6**

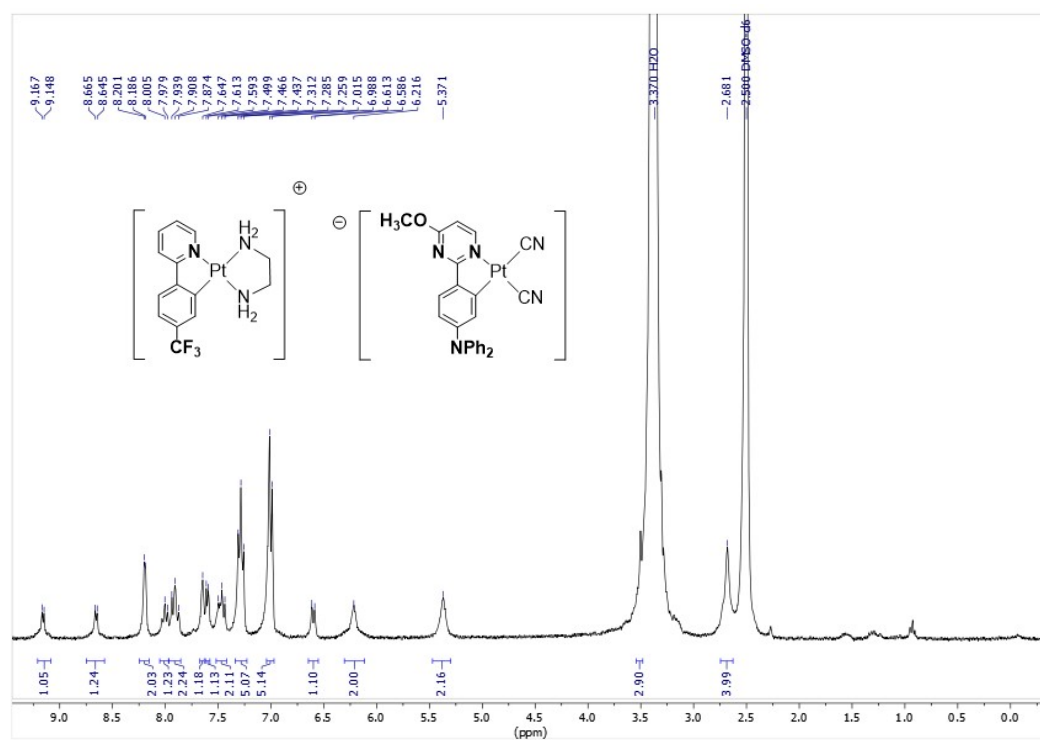

Figure S42 :  $^1\text{H}$  NMR spectrum for soft salt **S6** in DMSO-d<sub>6</sub>



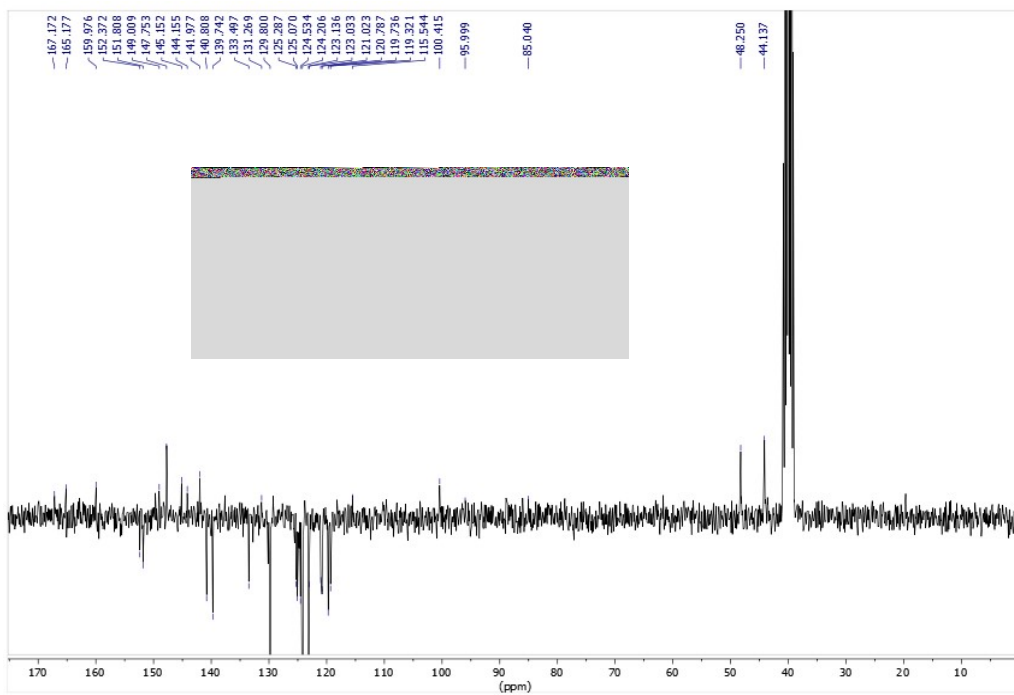

Figure S43 : J-mod  $^{13}\text{C}$  NMR spectrum for soft salt **S6** in DMSO-d<sub>6</sub>

**S7**

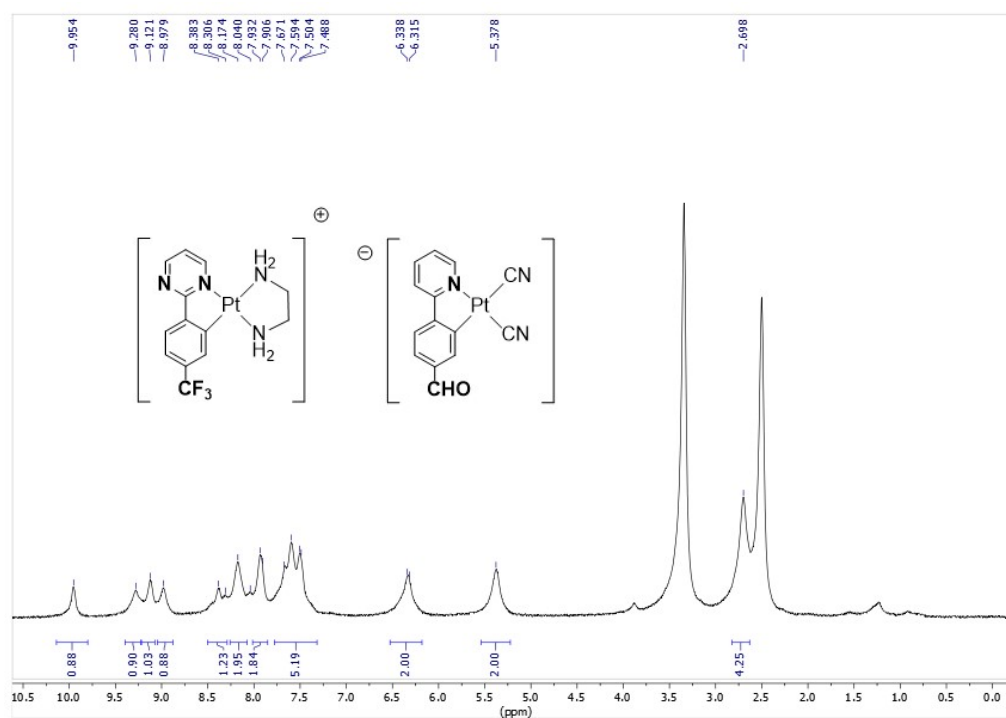

Figure S44 :  $^1\text{H}$  NMR spectrum for soft salt **S7** in DMSO-d<sub>6</sub>

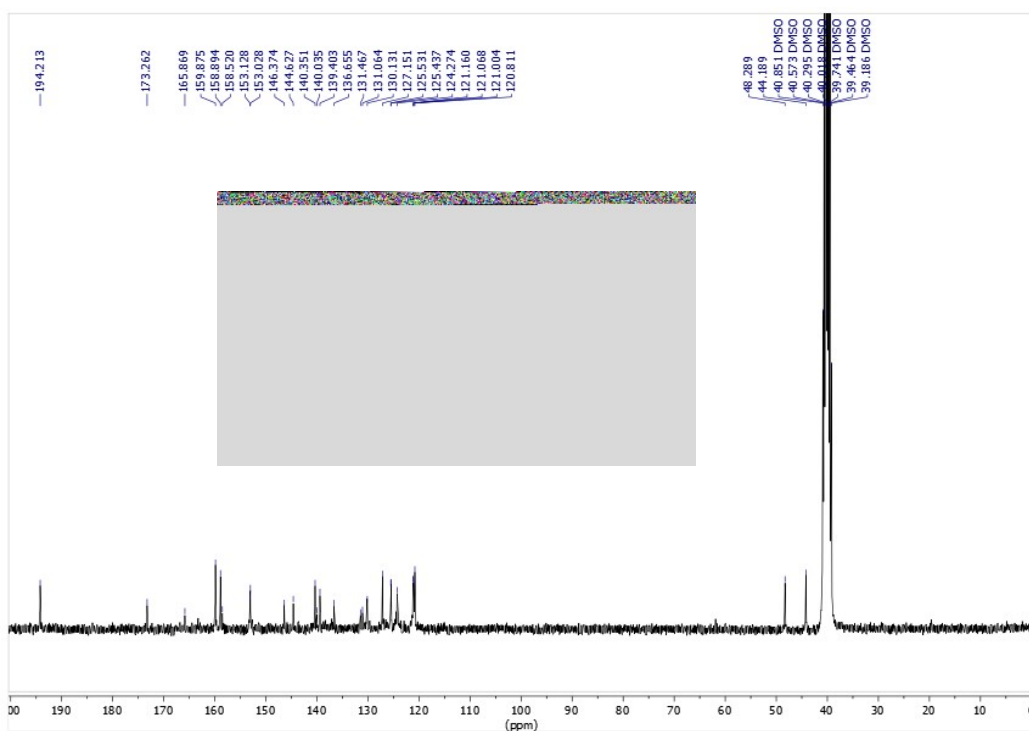

Figure S45 :  $^1\text{H}$  NMR spectrum for soft salt **S7** in DMSO- $d_6$

**S8**

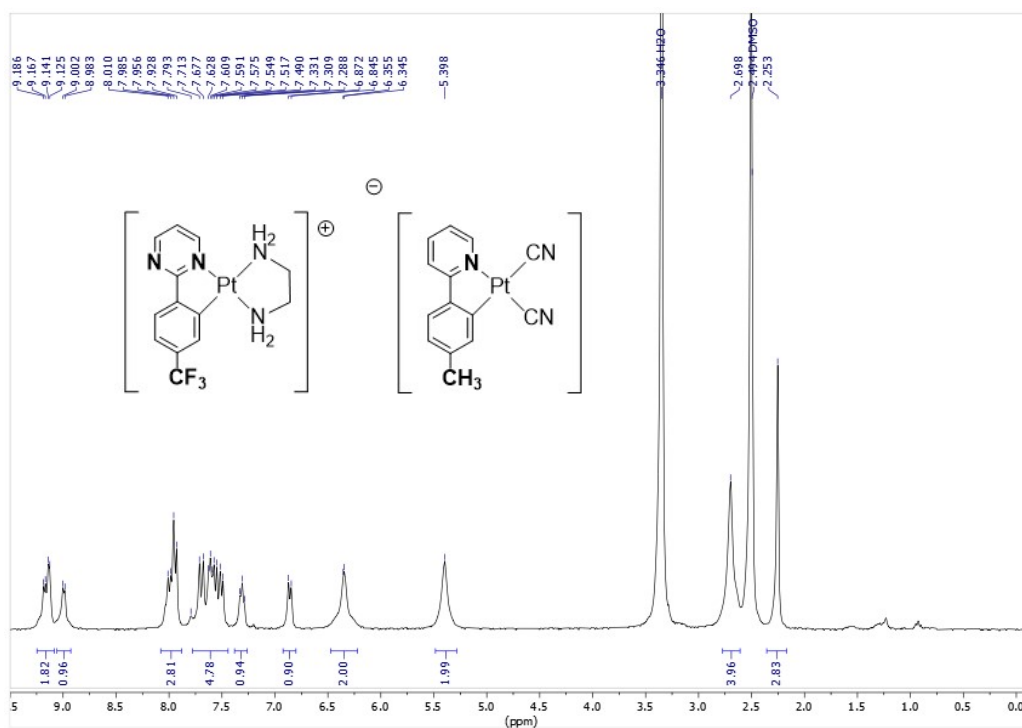

Figure S46 :  $^1\text{H}$  NMR spectrum soft salt **S8** in DMSO- $d_6$

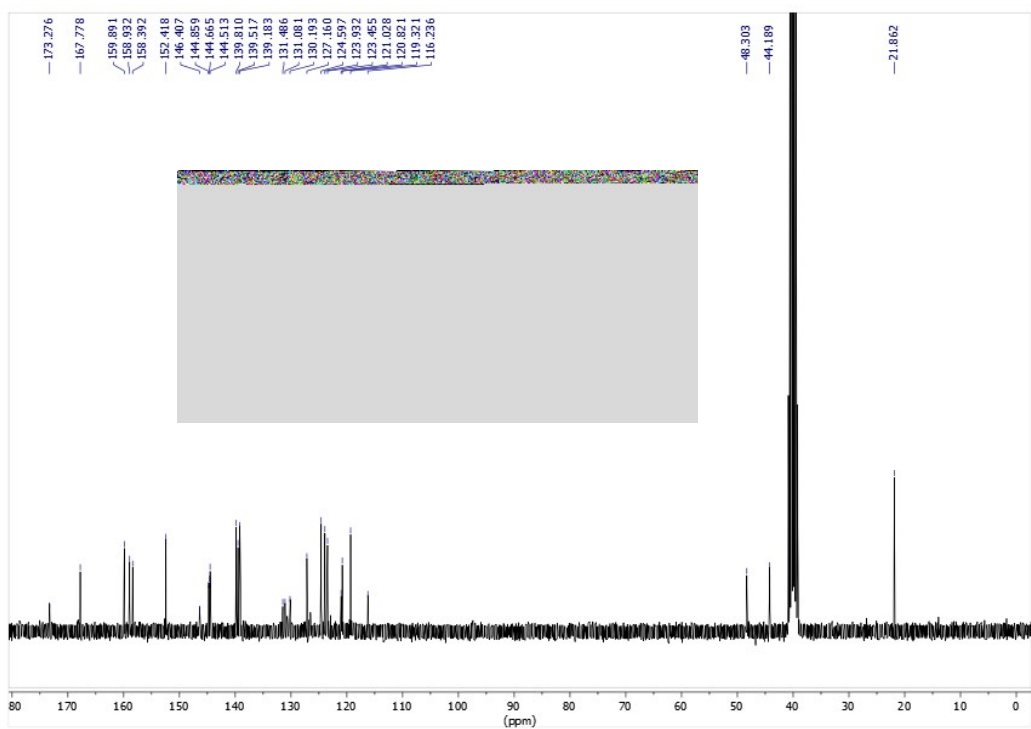

Figure S47 :  $^{13}\text{C}$  NMR spectrum for soft salt **S8** in DMSO- $d_6$

S9

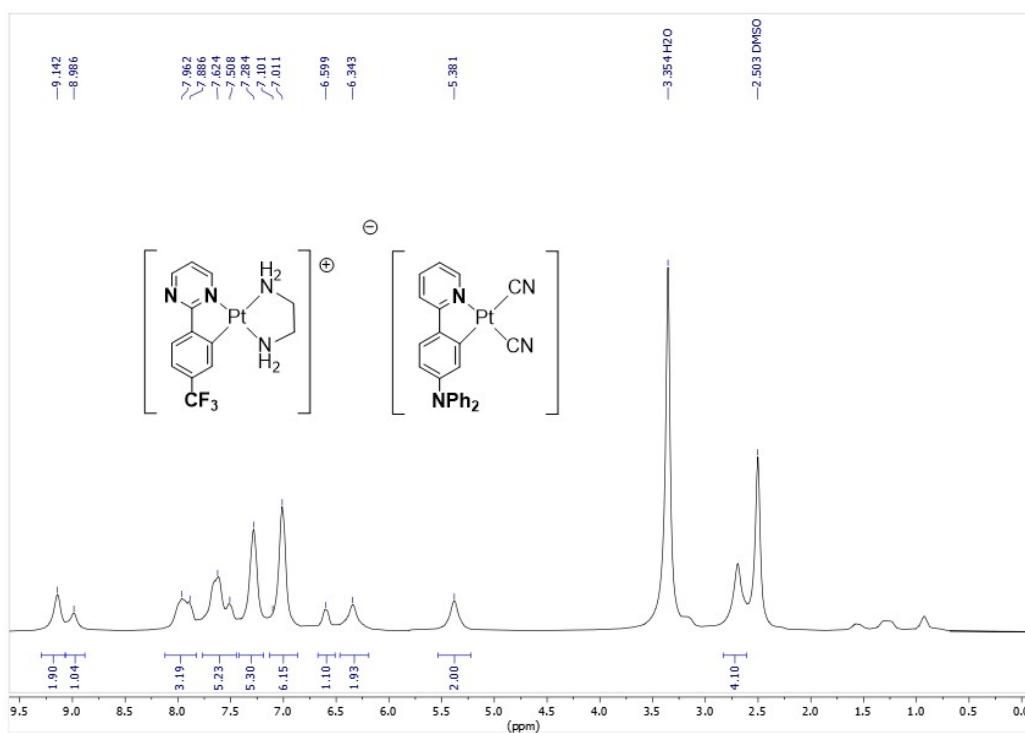

Figure S48 :  $^1\text{H}$  NMR spectrum soft salt **S9** in DMSO- $d_6$

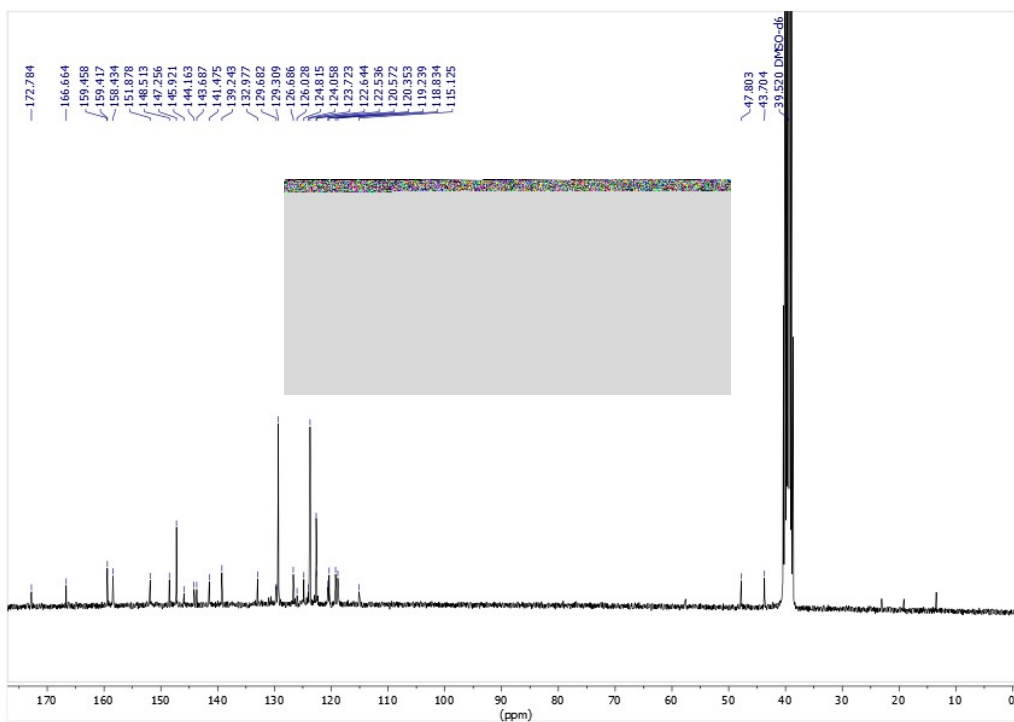

Figure S49 :  $^{13}\text{C}$  NMR spectrum for soft salt **S9** in DMSO-d6

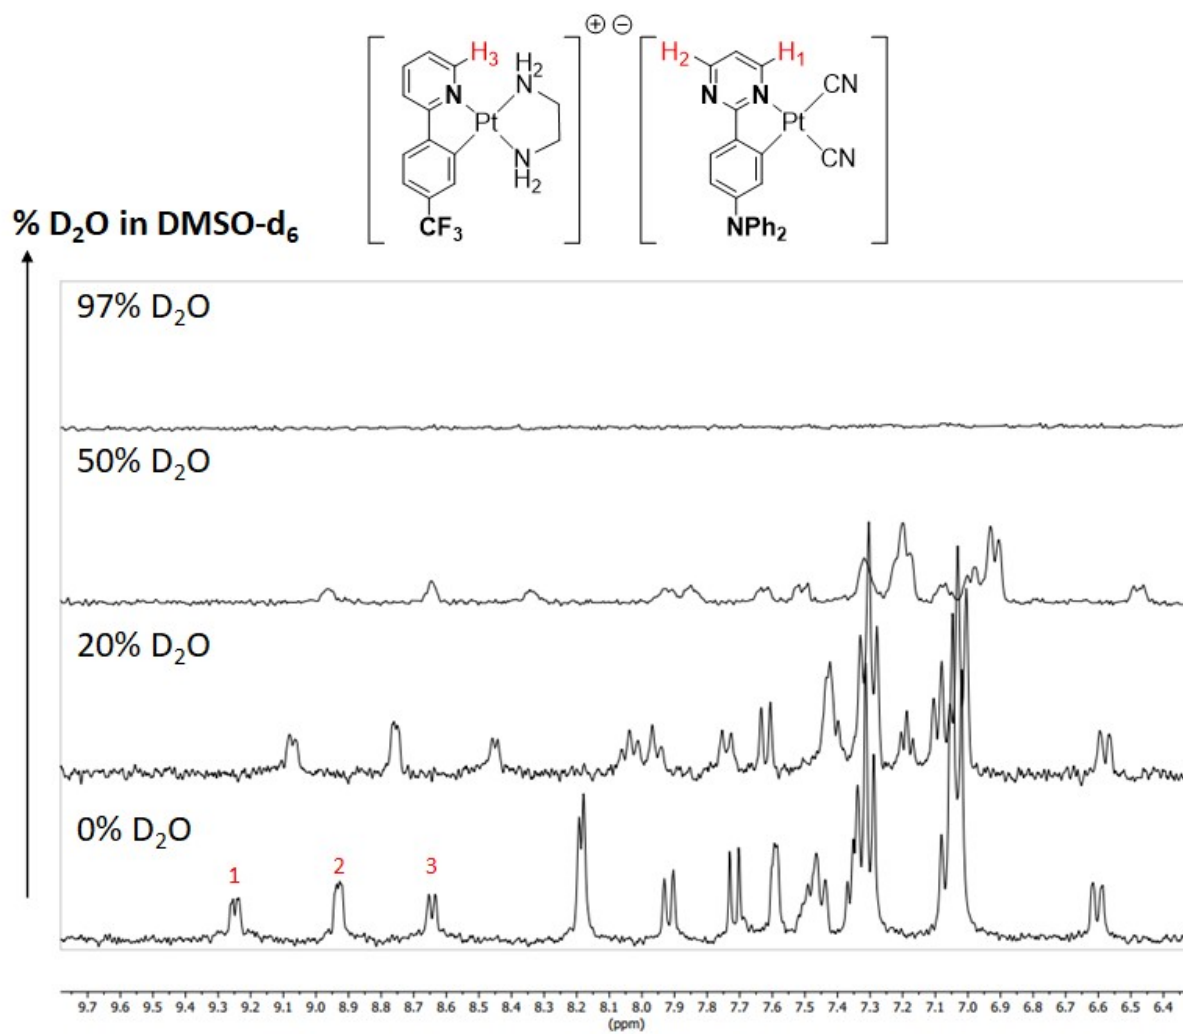

**Figure S50** : <sup>1</sup>H NMR of S5 in the DMSO-D<sub>2</sub>O mixture (10<sup>-3</sup> M) with different D<sub>2</sub>O fractions

## 6- Photophysical data in solution

| Complexes | Absorption $\lambda_{max}/nm$<br>( $\epsilon / mM^{-1} cm^{-1}$ ) | Emission $\lambda_{max}/nm^a$ | $\Phi_{PL}^{a,b}$ | Table S1 : Photophysical properties of C1-2 and A1-7 |
|-----------|-------------------------------------------------------------------|-------------------------------|-------------------|------------------------------------------------------|
| C1        | 334 (6.5), 341 (7.3), 371 (4.4), 390 (3.1)                        | 490, 524, 566sh               | < 0.01            |                                                      |
| C2        | 320 (14.6), 330 (14.6), 354 (11.3), 388 (4.2)                     | 490, 523                      | < 0.01            |                                                      |
| A1        | 292 (19.9), 321 (12.1), 334 (11850), 392 (2.8)                    | 480, 512, 566sh               | < 0.01            |                                                      |
| A2        | 316 (8.6), 329 (5.3), 351 (4.5), 388 (11.3)                       | 480, 512, 549sh               | < 0.01            |                                                      |
| A3        | 321 (15.5), 332 (16.8), 361 (5.4), 385 (4.2)                      | 486, 513, 560sh               | < 0.01            |                                                      |
| A4        | 306 (31.9), 340 (26.2), 411 (23)                                  | 511                           | 0.073             |                                                      |
| A5        | 372 (1.8), 411 (2.4)                                              | 620                           | 0.19              |                                                      |
| A6        | 343 (19.2), 369 (22.2), 412 (24)                                  | 573                           | 0.46              |                                                      |
| A7        | 309 (30.3), 339 (20.5), 410 (35)                                  | 495sh, 543                    | 0.27              |                                                      |

complexes in DMSO solution ( $10^{-5}$  M).

<sup>a</sup> All analysis was performed in degassed DMSO solution <sup>b</sup> PLQY ( $\pm 10\%$ ) measured relative to 9-10-bisphenylethynylantracene in cyclohexane ( $\Phi_{PL} = 1.00$ ).

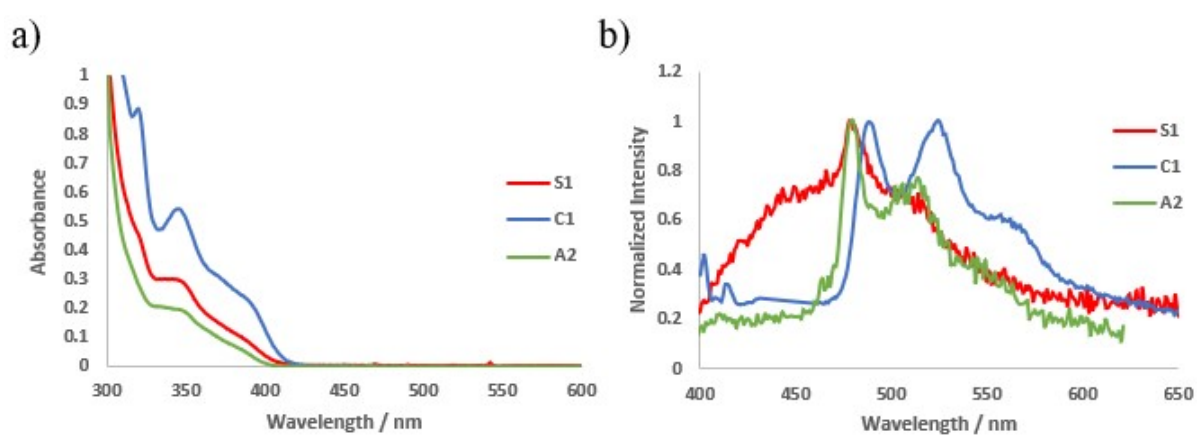

**Figure S51** : a) UV-Vis absorption spectra of **S1**, **C1**, and **A2** in DMSO solution ( $10^{-5}$  M); b) PL spectra of **S1**, **C1**, and **A2** in DMSO solution ( $10^{-5}$  M).

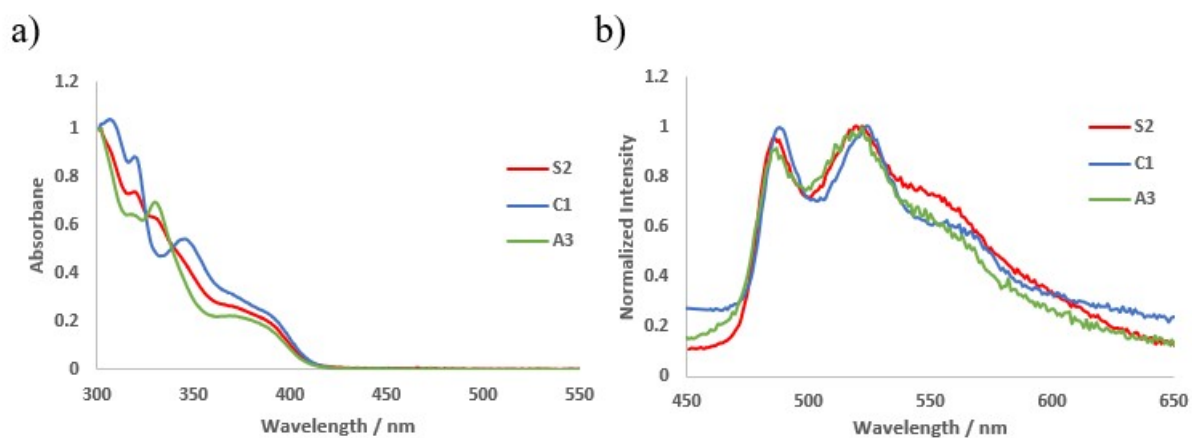

**Figure S52** : a) UV-Vis absorption spectra of **S2**, **C1**, and **A3** in DMSO solution ( $10^{-5}$  M); b) PL spectra of **S2**, **C1**, and **A3** in DMSO solution ( $10^{-5}$  M).

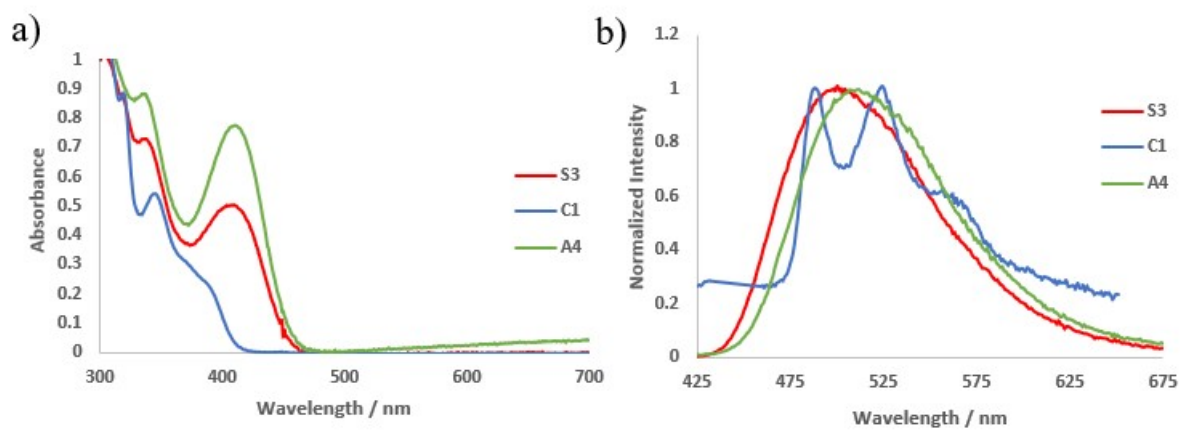

**Figure S53** : a) UV-Vis absorption spectra of **S3**, **C1**, and **A4** in DMSO solution ( $10^{-5}$  M); b) PL spectra of **S3**, **C1**, and **A4** in DMSO solution ( $10^{-5}$  M).

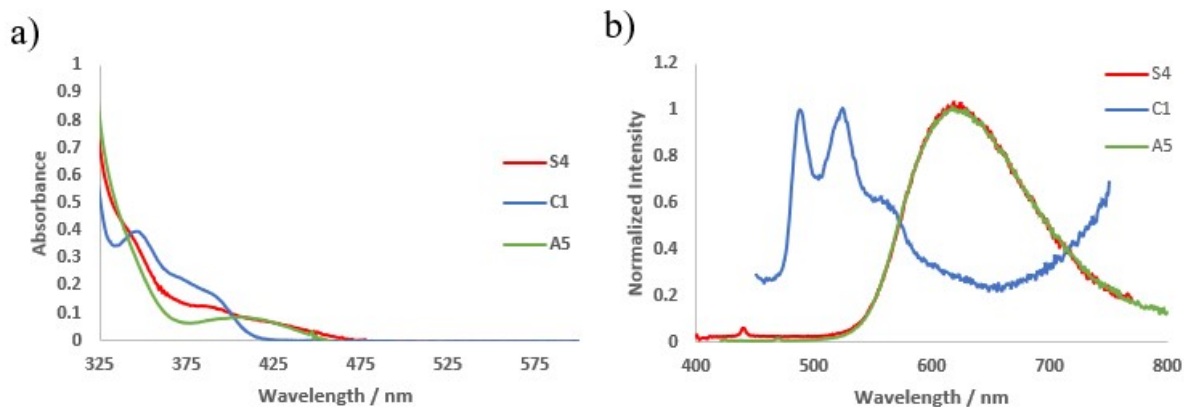

**Figure S54 :** a) UV-Vis absorption spectra of **S4**, **C1**, and **A5** in DMSO solution ( $10^{-5}$  M); b) PL spectra of **S4**, **C1**, and **A5** in DMSO solution ( $10^{-5}$  M).

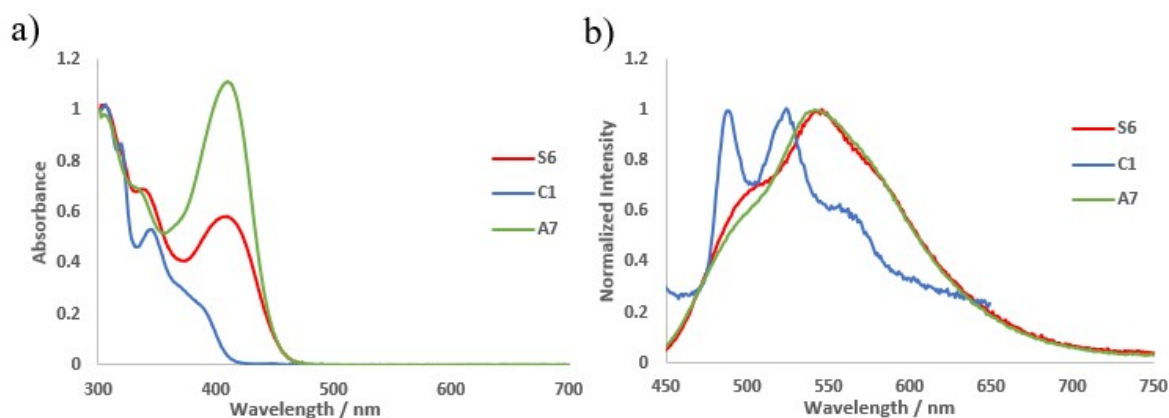

**Figure S55 :** a) UV-Vis absorption spectra of **S6**, **C1**, and **A7** in DMSO solution ( $10^{-5}$  M); b) PL spectra of **S6**, **C1**, and **A7** in DMSO solution ( $10^{-5}$  M).

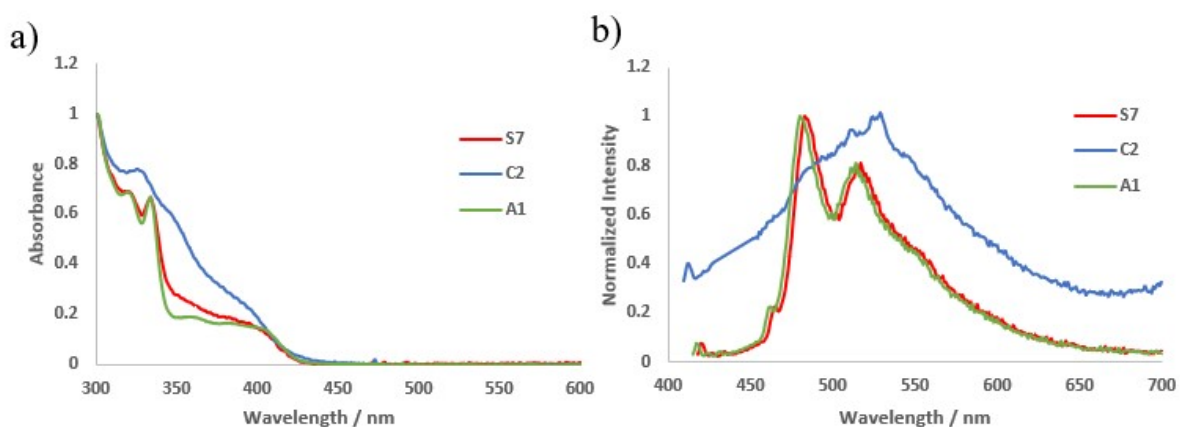

**Figure S56 :** a) UV-Vis absorption spectra of **S7**, **C2**, and **A1** in DMSO solution ( $10^{-5}$  M); b) PL spectra of **S7**, **C2**, and **A1** in DMSO solution ( $10^{-5}$  M).



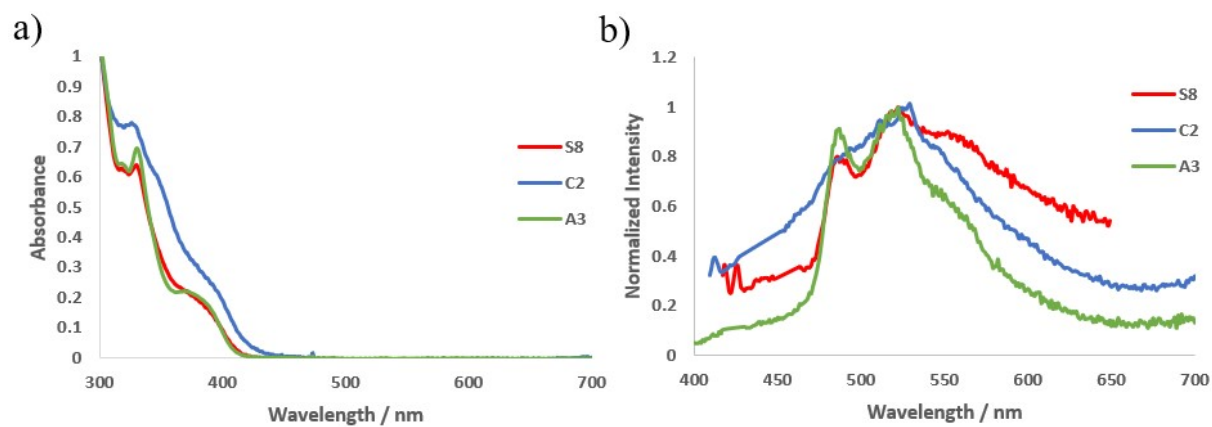

**Figure S57 :** a) UV-Vis absorption spectra of **S8**, **C2**, and **A3** in DMSO solution ( $10^{-5}$  M); b) PL spectra of **S8**, **C2**, and **A3** in DMSO solution ( $10^{-5}$  M).

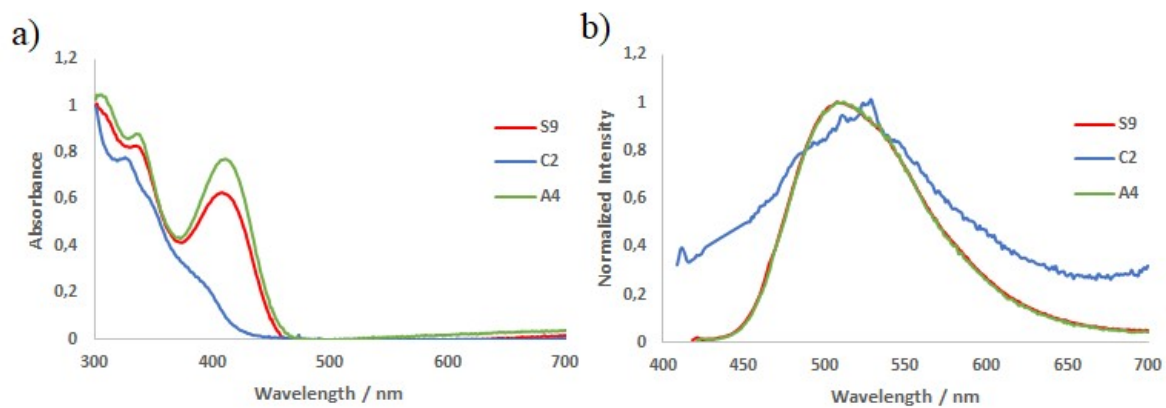

**Figure S58 :** a) UV-Vis absorption spectra of **S9**, **C2** and **A4** in DMSO solution ( $10^{-5}$  M); b) PL spectra of **S9**, **C2**, and **A4** in DMSO solution ( $10^{-5}$  M).

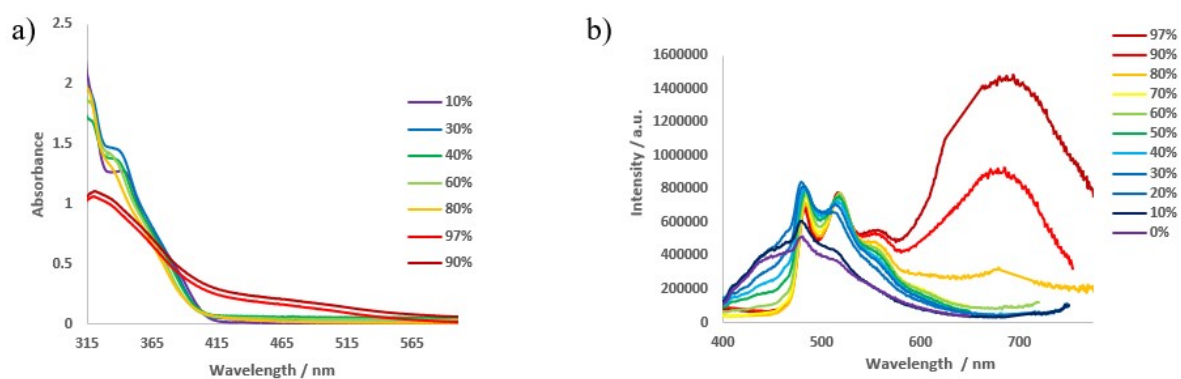

**Figure S59 :** a) UV-Vis absorption spectra of **S1** in the DMSO-H<sub>2</sub>O mixture ( $10^{-3}$  M) with different H<sub>2</sub>O fractions; b) PL spectra of **S1** in the DMSO-H<sub>2</sub>O mixture ( $10^{-3}$  M) with different H<sub>2</sub>O fractions.

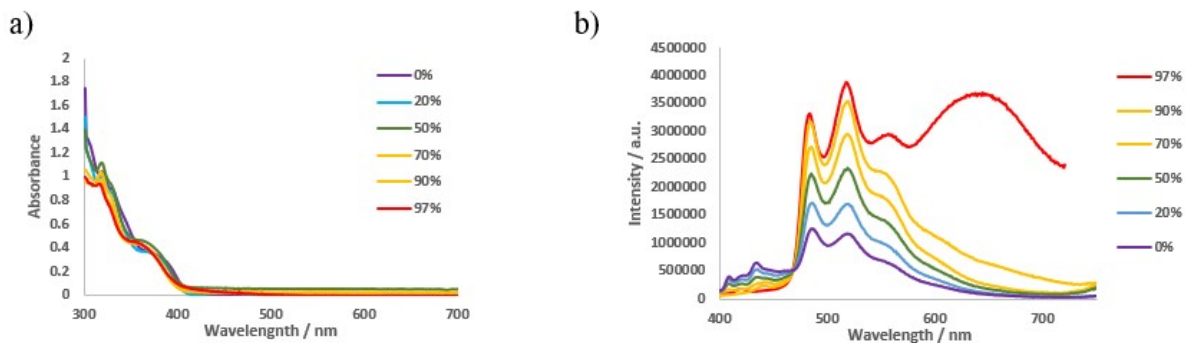

**Figure S60 :** a) UV-Vis absorption spectra of **S2** in the DMSO-H<sub>2</sub>O mixture (10<sup>-3</sup> M) with different H<sub>2</sub>O fractions; b) PL spectra of **S2** in the DMSO-H<sub>2</sub>O mixture (10<sup>-3</sup> M) with different H<sub>2</sub>O fractions.

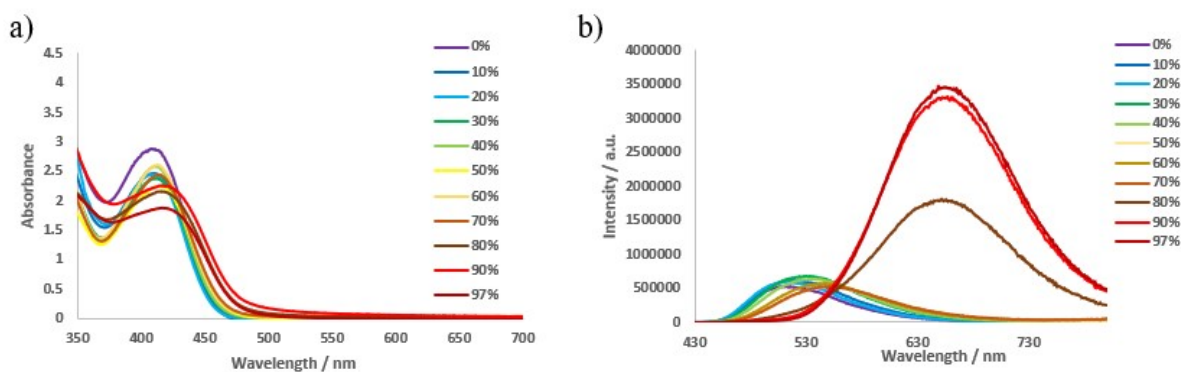

**Figure S61 :** a) UV-Vis absorption spectra of **S3** in the DMSO-H<sub>2</sub>O mixture (10<sup>-3</sup> M) with different H<sub>2</sub>O fractions; b) PL spectra of **S3** in the DMSO-H<sub>2</sub>O mixture (10<sup>-3</sup> M) with different H<sub>2</sub>O fractions.

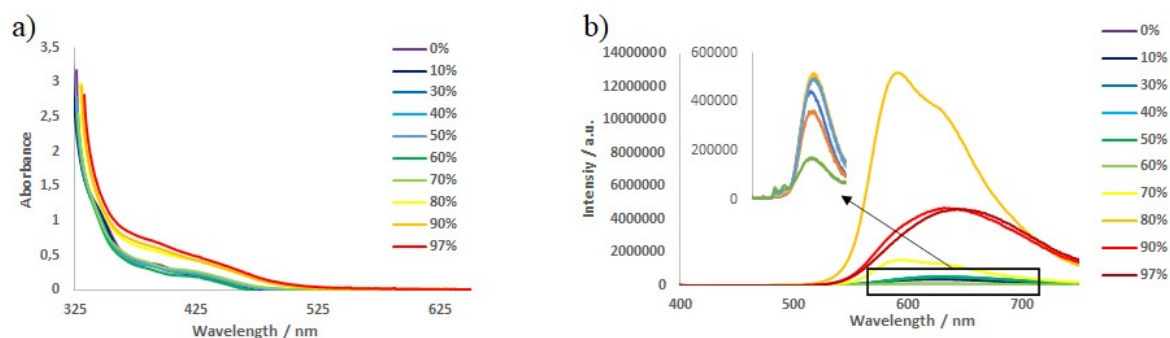

**Figure S62 :** a) UV-Vis absorption spectra of **S4** in the DMSO-H<sub>2</sub>O mixture (10<sup>-3</sup> M) with different H<sub>2</sub>O fractions; b) PL spectra of **S4** in the DMSO-H<sub>2</sub>O mixture (10<sup>-3</sup> M) with different H<sub>2</sub>O fractions.

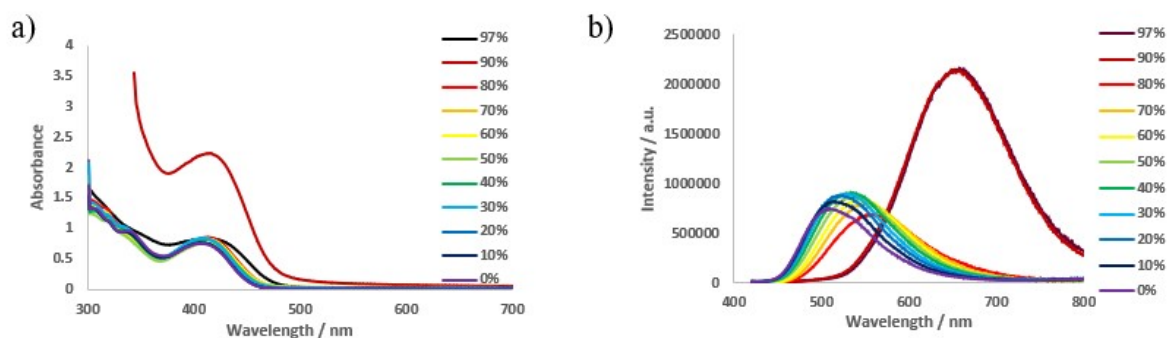

**Figure S63 :** a) UV-Vis absorption spectra of **S6** in the DMSO-H<sub>2</sub>O mixture (10<sup>-3</sup> M) with different H<sub>2</sub>O fractions; b) PL spectra of **S6** in the DMSO-H<sub>2</sub>O mixture (10<sup>-3</sup> M) with different H<sub>2</sub>O fractions.

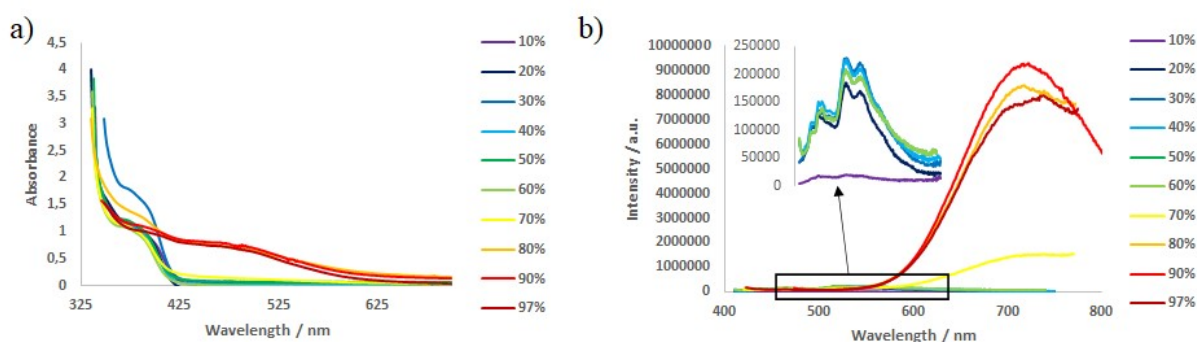

**Figure S64 :** a) UV-Vis absorption spectra of **S7** in the DMSO-H<sub>2</sub>O mixture (10<sup>-3</sup> M) with different H<sub>2</sub>O fractions; b) PL spectra of **S7** in the DMSO-H<sub>2</sub>O mixture (10<sup>-3</sup> M) with different H<sub>2</sub>O fractions.

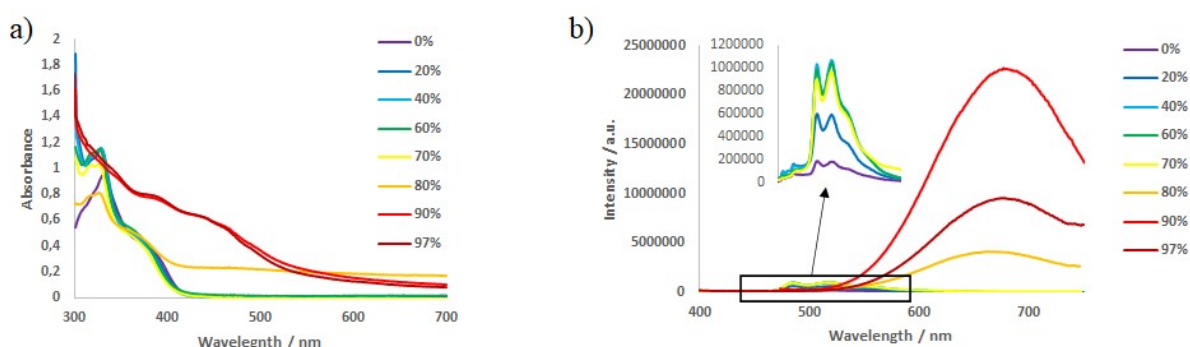

**Figure S65 :** a) UV-Vis absorption spectra of **S8** in the DMSO-H<sub>2</sub>O mixture (10<sup>-3</sup> M) with different H<sub>2</sub>O fractions; b) PL spectra of **S8** in the DMSO-H<sub>2</sub>O mixture (10<sup>-3</sup> M) with different H<sub>2</sub>O fractions.

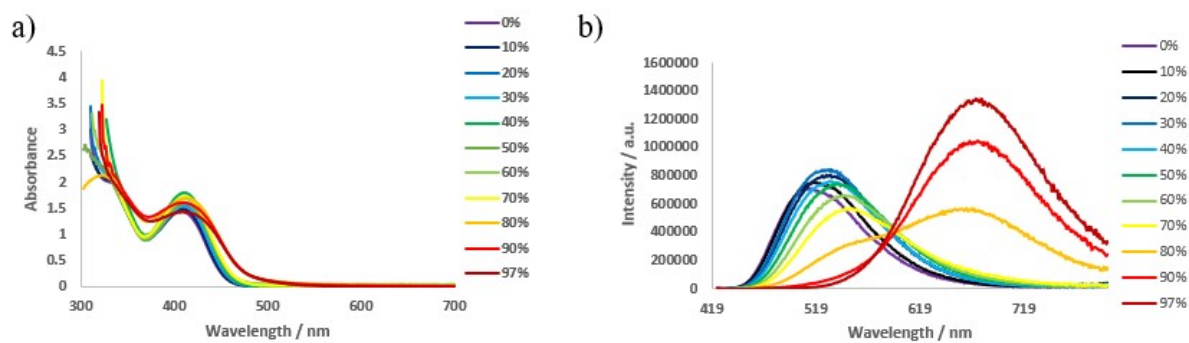

**Figure S66 :** a) UV-Vis absorption spectra of **S9** in the DMSO-H<sub>2</sub>O mixture (10<sup>-3</sup> M) with different H<sub>2</sub>O fractions; b) PL spectra of **S9** in the DMSO-H<sub>2</sub>O mixture (10<sup>-3</sup> M) with different H<sub>2</sub>O fractions.

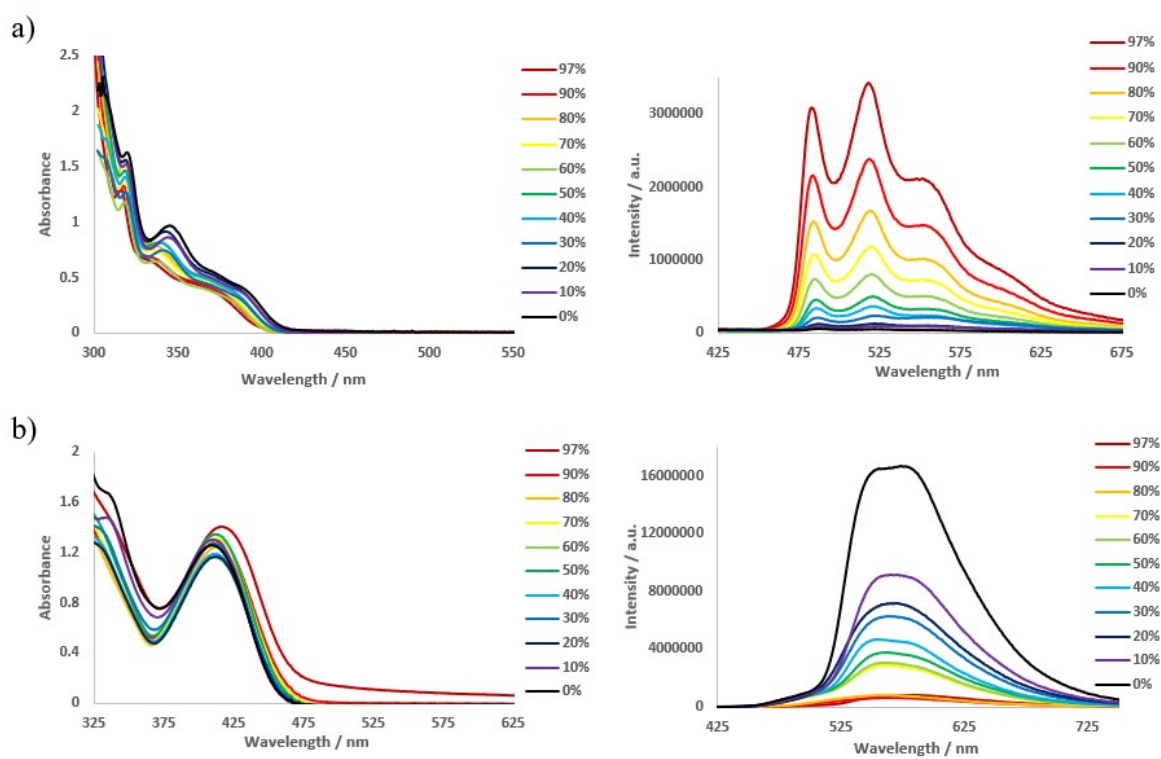

**Figure S67 :** a) Uv-Vis absorption and emission spectra of **C1** in DMSO-water mixtures (10<sup>-3</sup> M) with different water ratio; b) Uv-Vis absorption and emission spectra of **A4** in DMSO-water mixtures (10<sup>-3</sup> M) with different water ratio.

## 7- Photophysical data in the solid state

Table S2 : Photophysical properties of C1-2 and A0-7 complexes in solid state.

| <b>Complexes</b> | <b>Emission<br/><math>\lambda_{max}/nm</math></b> | <b><math>\Phi_{PL}^a</math><br/>(<math>\tau_0/\mu s</math>)</b> | <b><math>k_r</math> (<math>s^{-1}</math>)</b> | <b><math>k_{nr}</math> (<math>s^{-1}</math>)</b> | <b>Chromaticity<br/>coordinates (x ; y)</b> |
|------------------|---------------------------------------------------|-----------------------------------------------------------------|-----------------------------------------------|--------------------------------------------------|---------------------------------------------|
| C1               | 532                                               | 0.04 (12.9)                                                     | $3.1 \times 10^3$                             | $7.4 \times 10^4$                                | (0.35 ; 0.55)                               |
| C2               | 567                                               | 0.07 (18.4)                                                     | $3.8 \times 10^3$                             | $5.0 \times 10^4$                                | (0.44 ; 0.501)                              |
| A1               | 620                                               | 0.31 (10.1)                                                     | $3.1 \times 10^4$                             | $6.8 \times 10^4$                                | (0.43 ; 0.52)                               |
| A2               | 478                                               | 0.53 (31.8)                                                     | $1.7 \times 10^4$                             | $1.5 \times 10^4$                                | (0.24 ; 0.50)                               |
| A3               | 558                                               | 0.57 (17.9)                                                     | $3.2 \times 10^4$                             | $2.4 \times 10^4$                                | (0.29 ; 0.56)                               |
| A4               | 579                                               | 0.09 (27.5)                                                     | $3.3 \times 10^3$                             | $3.3 \times 10^4$                                | (0.42 ; 0.49)                               |
| A5               | 644                                               | 0.25 (18)                                                       | $1.4 \times 10^4$                             | $4.2 \times 10^4$                                | (0.54 ; 0.45)                               |
| A6               | 589                                               | 0.35 (37.3)                                                     | $9.4 \times 10^3$                             | $1.7 \times 10^4$                                | (0.48 ; 0.48)                               |
| A7               | 614                                               | 0.06 (24.4)                                                     | $2.5 \times 10^3$                             | $6.9 \times 10^4$                                | (0.49 ; 0.43)                               |

<sup>a</sup> Measured as powder with an integrating sphere

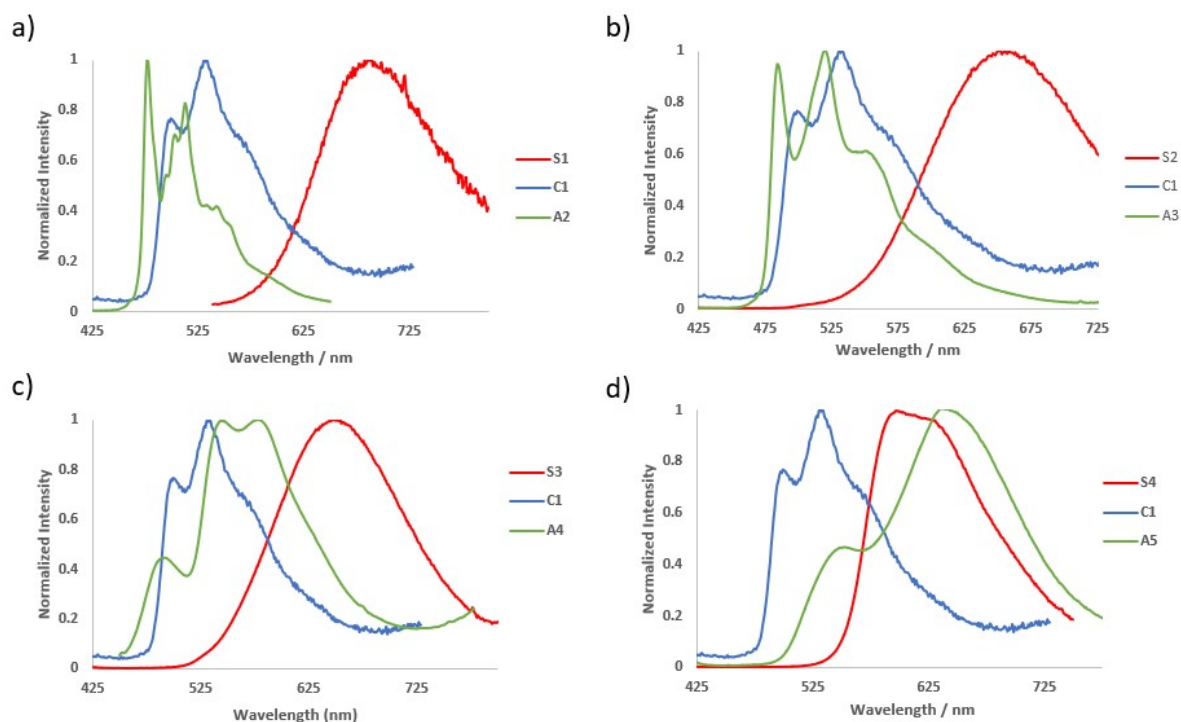

**Figure S68** : a) PL spectra in solid state of **S1**, **C1**, and **A2** at 298 K; b) PL spectra in solid state of **S2**, **C1**, and **A3** at 298 K; c) PL spectra in solid state of **S3**, **C1**, and **A4** at 298 K; d) PL spectra in solid state of **S4**, **C1**, and **A5** at 298 K; e) PL spectra in solid state of **S6**, **C1**, and **A7** at 298 K; f) PL spectra in solid state of **S7**, **C2**, and **A1** at 298 K; g) PL spectra in solid state of **S8**, **C2**, and **A3** at 298 K; a) PL spectra in solid state of **S9**, **C2**, and **A4** at 298 K.

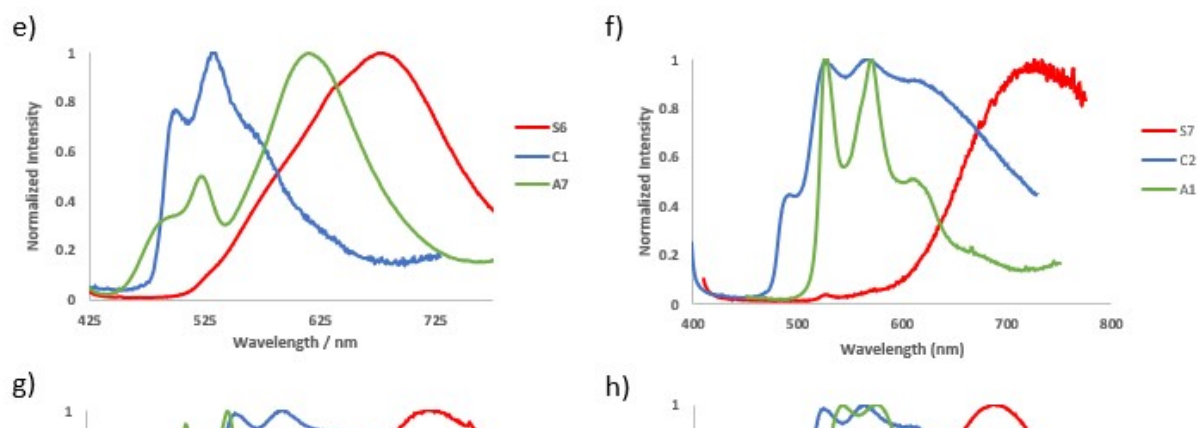

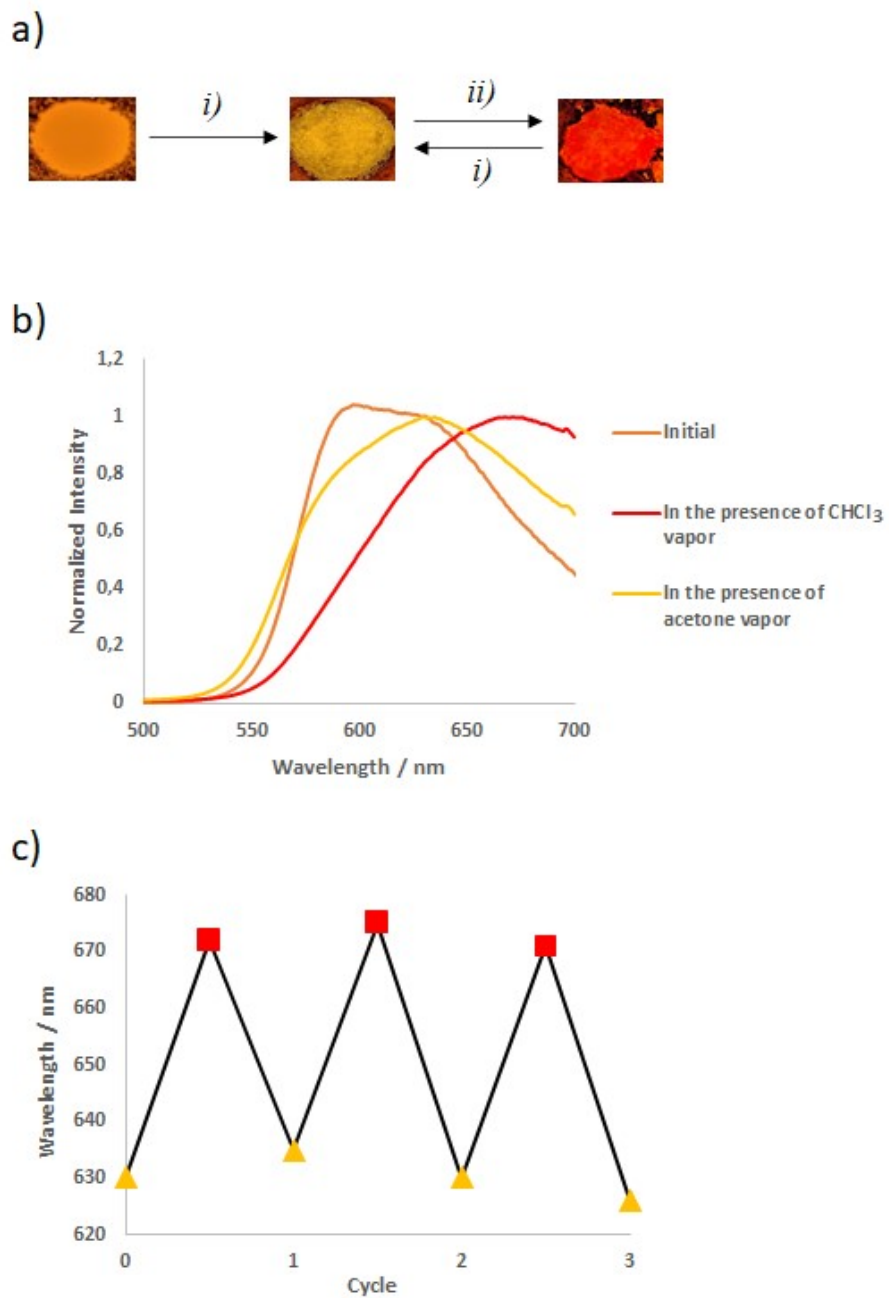

**Figure S69** : a) Vapo-chromic behavior of **S4** in solid state. Pictures were taken in the dark upon irradiation with a handheld UV lamp ( $\lambda_{\text{exc}} = 365 \text{ nm}$ ). Conditions: i) Acetone vapors, ii)  $\text{CHCl}_3$  vapors; b) Normalized PI spectra of **S3** in the initial and in presence of  $\text{CHCl}_3$ /Acetone vapors; c) 3 cycles of emission wavelength variations measured after repeated fuming with  $\text{CHCl}_3$ /Acetone.



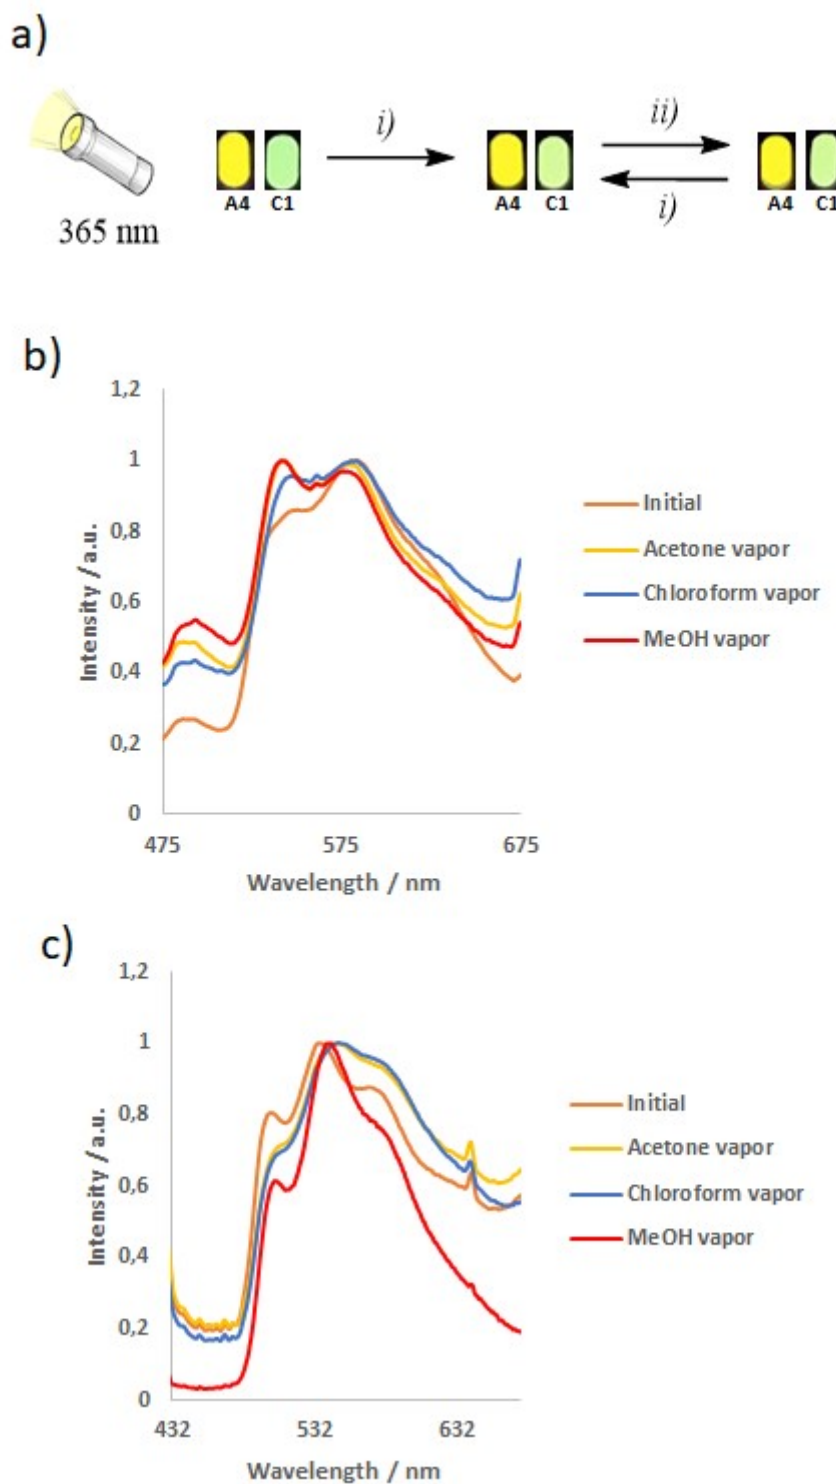

**Figure S70** : a) Vapo-chromic behavior of **C1** and **A4** in solid state. Pictures were taken in the dark upon irradiation with a handheld UV lamp ( $\lambda_{exc} = 365$  nm). Conditions: i) MeOH vapors, ii) Acetone vapors; Normalized PL spectra of **C1** b) and **A4** c) in the initial and in presence of MeOH/Acetone/  $CHCl_3$  vapor.

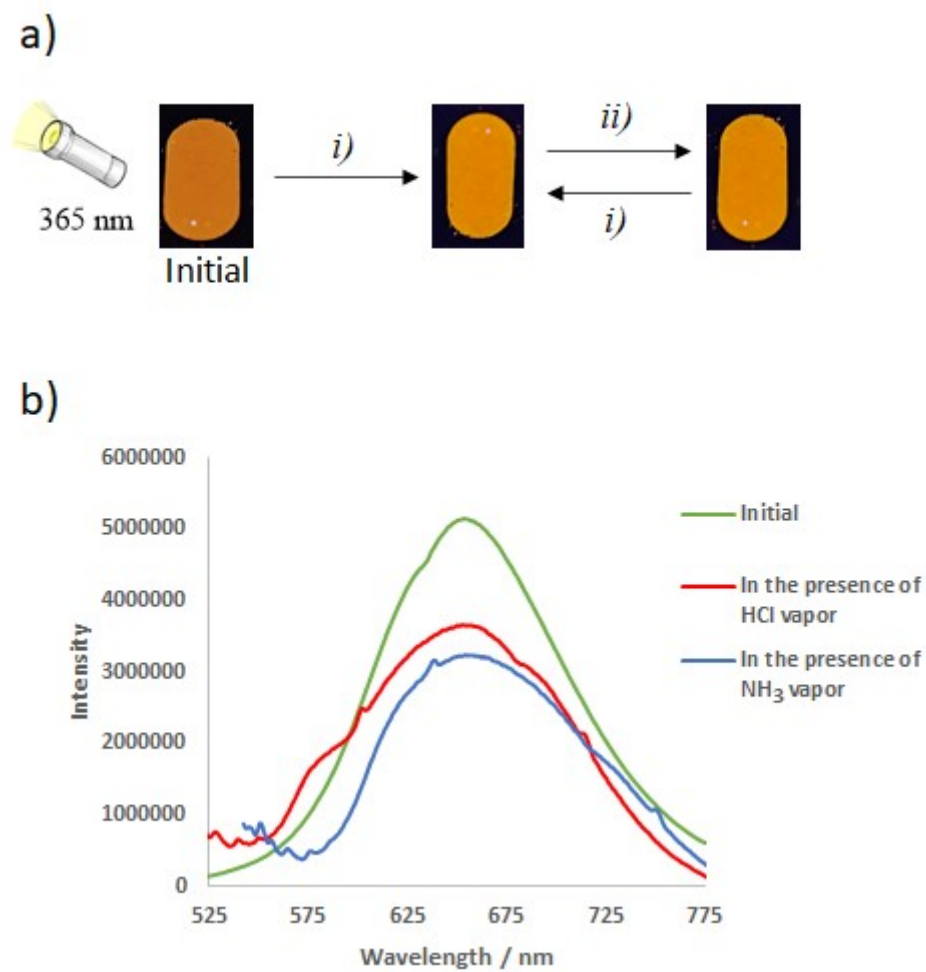

**Figure S71** : a) Pictures of **S3** taken in the dark upon irradiation with a handheld UV lamp ( $\lambda_{exc} = 365$  nm). Conditions : i) HCl vapors, ii) NH<sub>3</sub> vapors; b) PL spectra of **S3** in the initial and in presence of HCl/NH<sub>3</sub> vapors.

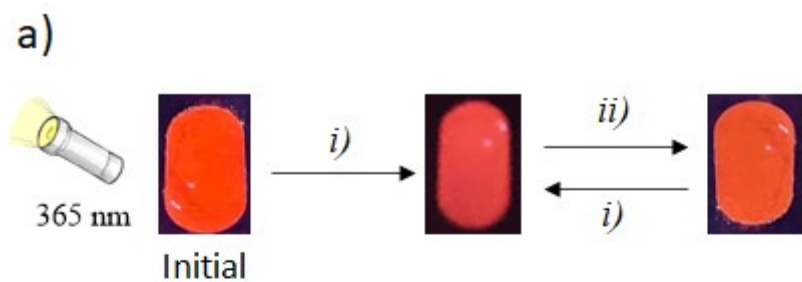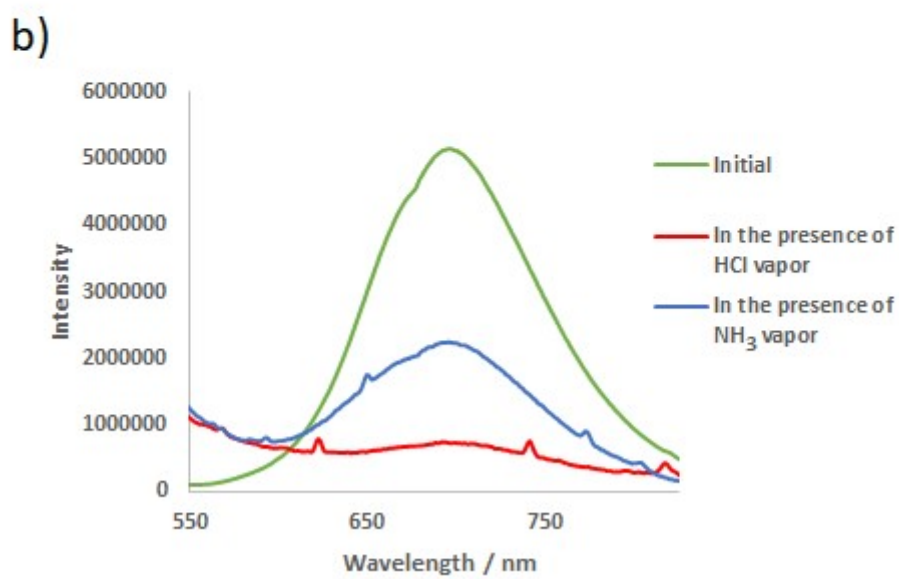

**Figure S72** : a) Pictures of **S9** taken in the dark upon irradiation with a handheld UV lamp ( $\lambda_{exc} = 365$  nm). Conditions : i) HCl vapors, ii) NH<sub>3</sub> vapors; b) PL spectra of **S9** in the initial and in presence of HCl/NH<sub>3</sub> vapors.

## References

- <sup>1</sup> HORIBA Scientific, A Guide to Recording Fluorescence Quantum Yields.
- <sup>2</sup> (a) J. Li, K. Chen, J. Wei, Y. Ma, R. Zhou, S. Liu, Q. Zhao, W.-Y. Wong, *J. Am. Chem. Soc.* 2021, **143**, 18317. (b) X. Hong, H. Wang, B. Liu, B. Xu, *Chem. Commun.* 2014, **50**, 14129.
- <sup>3</sup> J. Yang, S. Liu, J.-F. Zheng, J. (S.) Zhou, *Eur. J. Org. Chem.* 2012, 6248.
- <sup>4</sup> S. Lee, Y. Lee, K. Kim, S. Heo, D. Y. Jeong, S. Kim, J. Cho, C. Kim, Y. You, *Inorg. Chem.* 2021, **60**, 7738.
- <sup>5</sup> Z. He, W.-Y. Wong, X. Yu, H.S. Kwok, Z. Lin, *Inorg. Chem.* 2006, **45**, 10922.
- <sup>6</sup> J. Zhao, F. Dang, Z. Feng, B. Liu, X. Yang, Y. Wu, G. Zhou, Z. Wu, W.-Y. Wong, *Chem. Commun.* 2017, **53**, 7581.
- <sup>7</sup> J.-i. Nishida, H. Echizen, T. Iwata, Y. Yamashita, *Chem. Lett.* 2005, **34**, 1378.
- <sup>8</sup> Y. Ma, K. Chen, J. Lu, J. Shen, C. Ma, S. Liu, Q. Zhao, W.-Y Wong, *Inorg. Chem.* 2021, **60**, 7510.
